# Supplementary material
Source: PubMed Central journal article supplement (PMC3235557)
Supplement: supp_awr263_ROIlist.pdf [file supp_awr263_ROIlist.pdf]

| ROI | x   | y   | z   | ROI  | x   | y  | z   | ROI  | x   | y   | z  |
|-----|-----|-----|-----|------|-----|----|-----|------|-----|-----|----|
| 1   | 21  | -88 | -32 | 1001 | 0   | 11 | -20 | 2001 | 48  | -58 | -8 |
| 2   | 15  | -88 | -32 | 1002 | -30 | 11 | -20 | 2002 | 42  | -58 | -8 |
| 3   | -12 | -88 | -32 | 1003 | -48 | 11 | -20 | 2003 | 30  | -58 | -8 |
| 4   | -18 | -88 | -32 | 1004 | 48  | 14 | -20 | 2004 | 21  | -58 | -8 |
| 5   | 27  | -85 | -32 | 1005 | 42  | 14 | -20 | 2005 | 15  | -58 | -8 |
| 6   | 9   | -85 | -32 | 1006 | 36  | 14 | -20 | 2006 | 9   | -58 | -8 |
| 7   | 3   | -85 | -32 | 1007 | 30  | 14 | -20 | 2007 | 3   | -58 | -8 |
| 8   | -3  | -85 | -32 | 1008 | 24  | 14 | -20 | 2008 | -3  | -58 | -8 |
| 9   | -24 | -85 | -32 | 1009 | 12  | 14 | -20 | 2009 | -9  | -58 | -8 |
| 10  | 33  | -82 | -32 | 1010 | -9  | 14 | -20 | 2010 | -15 | -58 | -8 |
| 11  | 21  | -82 | -32 | 1011 | 6   | 17 | -20 | 2011 | -42 | -58 | -8 |
| 12  | 15  | -82 | -32 | 1012 | -18 | 17 | -20 | 2012 | 60  | -55 | -8 |
| 13  | -9  | -82 | -32 | 1013 | -24 | 17 | -20 | 2013 | -21 | -55 | -8 |
| 14  | -15 | -82 | -32 | 1014 | -30 | 17 | -20 | 2014 | -27 | -55 | -8 |
| 15  | -30 | -82 | -32 | 1015 | -36 | 17 | -20 | 2015 | -48 | -55 | -8 |
| 16  | 39  | -79 | -32 | 1016 | -42 | 17 | -20 | 2016 | -54 | -55 | -8 |
| 17  | 27  | -79 | -32 | 1017 | 42  | 20 | -20 | 2017 | 48  | -52 | -8 |
| 18  | 9   | -79 | -32 | 1018 | 36  | 20 | -20 | 2018 | 42  | -52 | -8 |
| 19  | 3   | -79 | -32 | 1019 | 30  | 20 | -20 | 2019 | 27  | -52 | -8 |
| 20  | -3  | -79 | -32 | 1020 | 24  | 20 | -20 | 2020 | 21  | -52 | -8 |
| 21  | -21 | -79 | -32 | 1021 | 0   | 20 | -20 | 2021 | 15  | -52 | -8 |
| 22  | -36 | -79 | -32 | 1022 | -6  | 20 | -20 | 2022 | 9   | -52 | -8 |
| 23  | 33  | -76 | -32 | 1023 | 18  | 23 | -20 | 2023 | 3   | -52 | -8 |
| 24  | 21  | -76 | -32 | 1024 | 9   | 23 | -20 | 2024 | -3  | -52 | -8 |
| 25  | 15  | -76 | -32 | 1025 | -15 | 23 | -20 | 2025 | -9  | -52 | -8 |
| 26  | -9  | -76 | -32 | 1026 | -21 | 23 | -20 | 2026 | 60  | -49 | -8 |
| 27  | -15 | -76 | -32 | 1027 | 3   | 26 | -20 | 2027 | -21 | -49 | -8 |
| 28  | -27 | -76 | -32 | 1028 | -3  | 26 | -20 | 2028 | -27 | -49 | -8 |
| 29  | 45  | -73 | -32 | 1029 | 18  | 29 | -20 | 2029 | 33  | -46 | -8 |
| 30  | 39  | -73 | -32 | 1030 | 9   | 29 | -20 | 2030 | 27  | -46 | -8 |
| 31  | 27  | -73 | -32 | 1031 | -15 | 29 | -20 | 2031 | 21  | -46 | -8 |
| 32  | 9   | -73 | -32 | 1032 | 0   | 32 | -20 | 2032 | 15  | -46 | -8 |
| 33  | 3   | -73 | -32 | 1033 | -6  | 32 | -20 | 2033 | 9   | -46 | -8 |
| 34  | -3  | -73 | -32 | 1034 | 15  | 35 | -20 | 2034 | 3   | -46 | -8 |
| 35  | -21 | -73 | -32 | 1035 | 9   | 35 | -20 | 2035 | -3  | -46 | -8 |
| 36  | -33 | -73 | -32 | 1036 | -15 | 35 | -20 | 2036 | -9  | -46 | -8 |
| 37  | -39 | -73 | -32 | 1037 | 0   | 38 | -20 | 2037 | -57 | -46 | -8 |
| 38  | 33  | -70 | -32 | 1038 | -6  | 38 | -20 | 2038 | -21 | -43 | -8 |
| 39  | 21  | -70 | -32 | 1039 | 15  | 41 | -20 | 2039 | -27 | -43 | -8 |
| 40  | 15  | -70 | -32 | 1040 | 9   | 41 | -20 | 2040 | 33  | -40 | -8 |
| 41  | -9  | -70 | -32 | 1041 | 3   | 44 | -20 | 2041 | 27  | -40 | -8 |
| 42  | -15 | -70 | -32 | 1042 | -6  | 44 | -20 | 2042 | 15  | -40 | -8 |
| 43  | -27 | -70 | -32 | 1043 | -12 | 44 | -20 | 2043 | 9   | -40 | -8 |
| 44  | -45 | -70 | -32 | 1044 | 12  | 47 | -20 | 2044 | -9  | -40 | -8 |
| 45  | 48  | -67 | -32 | 1045 | 0   | 50 | -20 | 2045 | -15 | -40 | -8 |
| 46  | 42  | -67 | -32 | 1046 | -6  | 50 | -20 | 2046 | -33 | -40 | -8 |

|    |     |     |     |      |     |     |     |      |     |     |    |
|----|-----|-----|-----|------|-----|-----|-----|------|-----|-----|----|
| 47 | 27  | -67 | -32 | 1047 | 12  | 53  | -20 | 2047 | -24 | -37 | -8 |
| 48 | 9   | -67 | -32 | 1048 | 6   | 56  | -20 | 2048 | 66  | -34 | -8 |
| 49 | 3   | -67 | -32 | 1049 | -6  | 56  | -20 | 2049 | 60  | -34 | -8 |
| 50 | -3  | -67 | -32 | 1050 | -9  | -94 | -17 | 2050 | 33  | -34 | -8 |
| 51 | -21 | -67 | -32 | 1051 | -21 | -94 | -17 | 2051 | 27  | -34 | -8 |
| 52 | -33 | -67 | -32 | 1052 | 12  | -91 | -17 | 2052 | 18  | -34 | -8 |
| 53 | -39 | -67 | -32 | 1053 | 0   | -91 | -17 | 2053 | 9   | -34 | -8 |
| 54 | 36  | -64 | -32 | 1054 | -9  | -88 | -17 | 2054 | 3   | -34 | -8 |
| 55 | 21  | -64 | -32 | 1055 | -21 | -88 | -17 | 2055 | -3  | -34 | -8 |
| 56 | 15  | -64 | -32 | 1056 | 33  | -85 | -17 | 2056 | -9  | -34 | -8 |
| 57 | -9  | -64 | -32 | 1057 | 24  | -85 | -17 | 2057 | -15 | -34 | -8 |
| 58 | -15 | -64 | -32 | 1058 | 12  | -85 | -17 | 2058 | -33 | -34 | -8 |
| 59 | -27 | -64 | -32 | 1059 | 6   | -85 | -17 | 2059 | -54 | -34 | -8 |
| 60 | -45 | -64 | -32 | 1060 | 0   | -85 | -17 | 2060 | -60 | -34 | -8 |
| 61 | 51  | -61 | -32 | 1061 | -33 | -85 | -17 | 2061 | 51  | -31 | -8 |
| 62 | 45  | -61 | -32 | 1062 | -9  | -82 | -17 | 2062 | -27 | -31 | -8 |
| 63 | 30  | -61 | -32 | 1063 | -21 | -82 | -17 | 2063 | 33  | -28 | -8 |
| 64 | 9   | -61 | -32 | 1064 | 30  | -79 | -17 | 2064 | 27  | -28 | -8 |
| 65 | 3   | -61 | -32 | 1065 | 24  | -79 | -17 | 2065 | 18  | -28 | -8 |
| 66 | -3  | -61 | -32 | 1066 | 12  | -79 | -17 | 2066 | 9   | -28 | -8 |
| 67 | -21 | -61 | -32 | 1067 | 6   | -79 | -17 | 2067 | 3   | -28 | -8 |
| 68 | -33 | -61 | -32 | 1068 | -3  | -79 | -17 | 2068 | -3  | -28 | -8 |
| 69 | -39 | -61 | -32 | 1069 | -33 | -79 | -17 | 2069 | -9  | -28 | -8 |
| 70 | 39  | -58 | -32 | 1070 | -18 | -76 | -17 | 2070 | -15 | -28 | -8 |
| 71 | 24  | -58 | -32 | 1071 | 36  | -73 | -17 | 2071 | -36 | -28 | -8 |
| 72 | -9  | -58 | -32 | 1072 | 24  | -73 | -17 | 2072 | -54 | -28 | -8 |
| 73 | -27 | -58 | -32 | 1073 | 18  | -73 | -17 | 2073 | -60 | -28 | -8 |
| 74 | -45 | -58 | -32 | 1074 | 3   | -73 | -17 | 2074 | 63  | -25 | -8 |
| 75 | -51 | -58 | -32 | 1075 | -3  | -73 | -17 | 2075 | 57  | -25 | -8 |
| 76 | 51  | -55 | -32 | 1076 | -9  | -73 | -17 | 2076 | 51  | -25 | -8 |
| 77 | 45  | -55 | -32 | 1077 | -33 | -73 | -17 | 2077 | -27 | -25 | -8 |
| 78 | 33  | -55 | -32 | 1078 | 45  | -70 | -17 | 2078 | 33  | -22 | -8 |
| 79 | 12  | -55 | -32 | 1079 | -18 | -70 | -17 | 2079 | 27  | -22 | -8 |
| 80 | 6   | -55 | -32 | 1080 | -27 | -70 | -17 | 2080 | 15  | -22 | -8 |
| 81 | 0   | -55 | -32 | 1081 | 33  | -67 | -17 | 2081 | 9   | -22 | -8 |
| 82 | -33 | -55 | -32 | 1082 | 27  | -67 | -17 | 2082 | 3   | -22 | -8 |
| 83 | -39 | -55 | -32 | 1083 | 18  | -67 | -17 | 2083 | -9  | -22 | -8 |
| 84 | 39  | -52 | -32 | 1084 | 3   | -67 | -17 | 2084 | -15 | -22 | -8 |
| 85 | 27  | -52 | -32 | 1085 | -3  | -67 | -17 | 2085 | -54 | -22 | -8 |
| 86 | -6  | -52 | -32 | 1086 | -9  | -67 | -17 | 2086 | -60 | -22 | -8 |
| 87 | -24 | -52 | -32 | 1087 | -39 | -67 | -17 | 2087 | 63  | -19 | -8 |
| 88 | -45 | -52 | -32 | 1088 | -45 | -67 | -17 | 2088 | 57  | -19 | -8 |
| 89 | 45  | -49 | -32 | 1089 | 51  | -64 | -17 | 2089 | 51  | -19 | -8 |
| 90 | 33  | -49 | -32 | 1090 | -21 | -64 | -17 | 2090 | 45  | -19 | -8 |
| 91 | 12  | -49 | -32 | 1091 | -30 | -64 | -17 | 2091 | -30 | -19 | -8 |
| 92 | 6   | -49 | -32 | 1092 | 24  | -61 | -17 | 2092 | 33  | -16 | -8 |
| 93 | 0   | -49 | -32 | 1093 | 18  | -61 | -17 | 2093 | 27  | -16 | -8 |

|     |     |     |     |      |     |     |     |      |     |     |    |
|-----|-----|-----|-----|------|-----|-----|-----|------|-----|-----|----|
| 94  | -30 | -49 | -32 | 1094 | -12 | -61 | -17 | 2094 | 9   | -16 | -8 |
| 95  | -36 | -49 | -32 | 1095 | -39 | -61 | -17 | 2095 | 3   | -16 | -8 |
| 96  | 39  | -46 | -32 | 1096 | -45 | -61 | -17 | 2096 | -6  | -16 | -8 |
| 97  | 27  | -46 | -32 | 1097 | 48  | -58 | -17 | 2097 | -39 | -16 | -8 |
| 98  | -9  | -46 | -32 | 1098 | -24 | -58 | -17 | 2098 | -45 | -16 | -8 |
| 99  | -24 | -46 | -32 | 1099 | -30 | -58 | -17 | 2099 | -51 | -16 | -8 |
| 100 | -42 | -46 | -32 | 1100 | 57  | -55 | -17 | 2100 | -60 | -16 | -8 |
| 101 | 33  | -43 | -32 | 1101 | 30  | -55 | -17 | 2101 | 63  | -13 | -8 |
| 102 | 21  | -43 | -32 | 1102 | 24  | -55 | -17 | 2102 | 57  | -13 | -8 |
| 103 | 15  | -43 | -32 | 1103 | 18  | -55 | -17 | 2103 | 51  | -13 | -8 |
| 104 | 9   | -43 | -32 | 1104 | 12  | -55 | -17 | 2104 | -30 | -13 | -8 |
| 105 | -30 | -43 | -32 | 1105 | 6   | -55 | -17 | 2105 | 45  | -10 | -8 |
| 106 | -36 | -43 | -32 | 1106 | 0   | -55 | -17 | 2106 | 39  | -10 | -8 |
| 107 | 27  | -40 | -32 | 1107 | -6  | -55 | -17 | 2107 | 33  | -10 | -8 |
| 108 | 3   | -40 | -32 | 1108 | -12 | -55 | -17 | 2108 | 27  | -10 | -8 |
| 109 | -3  | -40 | -32 | 1109 | -48 | -55 | -17 | 2109 | 21  | -10 | -8 |
| 110 | -9  | -40 | -32 | 1110 | -54 | -55 | -17 | 2110 | 3   | -10 | -8 |
| 111 | -21 | -40 | -32 | 1111 | 48  | -52 | -17 | 2111 | -3  | -10 | -8 |
| 112 | 33  | -37 | -32 | 1112 | 42  | -52 | -17 | 2112 | -21 | -10 | -8 |
| 113 | 21  | -37 | -32 | 1113 | -18 | -52 | -17 | 2113 | -42 | -10 | -8 |
| 114 | 15  | -37 | -32 | 1114 | -24 | -52 | -17 | 2114 | -57 | -10 | -8 |
| 115 | 9   | -37 | -32 | 1115 | -30 | -52 | -17 | 2115 | 57  | -7  | -8 |
| 116 | -27 | -37 | -32 | 1116 | 30  | -49 | -17 | 2116 | -30 | -7  | -8 |
| 117 | -33 | -37 | -32 | 1117 | 24  | -49 | -17 | 2117 | -48 | -7  | -8 |
| 118 | 27  | -34 | -32 | 1118 | 18  | -49 | -17 | 2118 | 51  | -4  | -8 |
| 119 | 3   | -34 | -32 | 1119 | 12  | -49 | -17 | 2119 | 45  | -4  | -8 |
| 120 | -3  | -34 | -32 | 1120 | 6   | -49 | -17 | 2120 | 39  | -4  | -8 |
| 121 | -9  | -34 | -32 | 1121 | 0   | -49 | -17 | 2121 | 33  | -4  | -8 |
| 122 | -21 | -34 | -32 | 1122 | -6  | -49 | -17 | 2122 | 27  | -4  | -8 |
| 123 | 21  | -31 | -32 | 1123 | -12 | -49 | -17 | 2123 | 21  | -4  | -8 |
| 124 | 15  | -31 | -32 | 1124 | -36 | -49 | -17 | 2124 | 15  | -4  | -8 |
| 125 | 9   | -31 | -32 | 1125 | -42 | -49 | -17 | 2125 | 9   | -4  | -8 |
| 126 | -27 | -31 | -32 | 1126 | -48 | -49 | -17 | 2126 | 3   | -4  | -8 |
| 127 | 27  | -28 | -32 | 1127 | -54 | -49 | -17 | 2127 | -3  | -4  | -8 |
| 128 | 3   | -28 | -32 | 1128 | 54  | -46 | -17 | 2128 | -9  | -4  | -8 |
| 129 | -3  | -28 | -32 | 1129 | 48  | -46 | -17 | 2129 | -15 | -4  | -8 |
| 130 | 12  | -25 | -32 | 1130 | 42  | -46 | -17 | 2130 | -21 | -4  | -8 |
| 131 | 51  | -22 | -32 | 1131 | -18 | -46 | -17 | 2131 | -42 | -4  | -8 |
| 132 | 45  | -22 | -32 | 1132 | -24 | -46 | -17 | 2132 | -57 | -4  | -8 |
| 133 | 39  | -22 | -32 | 1133 | -30 | -46 | -17 | 2133 | -30 | -1  | -8 |
| 134 | 33  | -22 | -32 | 1134 | 36  | -43 | -17 | 2134 | -36 | -1  | -8 |
| 135 | 27  | -22 | -32 | 1135 | 18  | -43 | -17 | 2135 | -48 | -1  | -8 |
| 136 | 6   | -22 | -32 | 1136 | 12  | -43 | -17 | 2136 | 57  | 2   | -8 |
| 137 | 0   | -22 | -32 | 1137 | 6   | -43 | -17 | 2137 | 51  | 2   | -8 |
| 138 | -27 | -22 | -32 | 1138 | 0   | -43 | -17 | 2138 | 45  | 2   | -8 |
| 139 | 57  | -19 | -32 | 1139 | -6  | -43 | -17 | 2139 | 39  | 2   | -8 |
| 140 | -33 | -19 | -32 | 1140 | -12 | -43 | -17 | 2140 | 33  | 2   | -8 |

|     |     |     |     |      |     |     |     |      |     |    |    |
|-----|-----|-----|-----|------|-----|-----|-----|------|-----|----|----|
| 141 | -39 | -19 | -32 | 1141 | -36 | -43 | -17 | 2141 | 24  | 2  | -8 |
| 142 | -45 | -19 | -32 | 1142 | -42 | -43 | -17 | 2142 | 15  | 2  | -8 |
| 143 | -51 | -19 | -32 | 1143 | -48 | -43 | -17 | 2143 | 6   | 2  | -8 |
| 144 | 51  | -16 | -32 | 1144 | -54 | -43 | -17 | 2144 | 0   | 2  | -8 |
| 145 | 45  | -16 | -32 | 1145 | -60 | -43 | -17 | 2145 | -9  | 2  | -8 |
| 146 | 39  | -16 | -32 | 1146 | 63  | -40 | -17 | 2146 | -15 | 2  | -8 |
| 147 | 33  | -16 | -32 | 1147 | 57  | -40 | -17 | 2147 | -24 | 5  | -8 |
| 148 | 27  | -16 | -32 | 1148 | 48  | -40 | -17 | 2148 | -30 | 5  | -8 |
| 149 | 21  | -16 | -32 | 1149 | 36  | -37 | -17 | 2149 | -36 | 5  | -8 |
| 150 | -21 | -16 | -32 | 1150 | 27  | -37 | -17 | 2150 | -42 | 5  | -8 |
| 151 | -27 | -16 | -32 | 1151 | 21  | -37 | -17 | 2151 | -48 | 5  | -8 |
| 152 | 57  | -13 | -32 | 1152 | 0   | -37 | -17 | 2152 | -54 | 5  | -8 |
| 153 | -33 | -13 | -32 | 1153 | -6  | -37 | -17 | 2153 | 51  | 8  | -8 |
| 154 | -39 | -13 | -32 | 1154 | -12 | -37 | -17 | 2154 | 45  | 8  | -8 |
| 155 | -45 | -13 | -32 | 1155 | -18 | -37 | -17 | 2155 | 39  | 8  | -8 |
| 156 | -51 | -13 | -32 | 1156 | -30 | -37 | -17 | 2156 | 30  | 8  | -8 |
| 157 | 51  | -10 | -32 | 1157 | -36 | -37 | -17 | 2157 | 24  | 8  | -8 |
| 158 | 45  | -10 | -32 | 1158 | -57 | -37 | -17 | 2158 | 18  | 8  | -8 |
| 159 | 39  | -10 | -32 | 1159 | 60  | -34 | -17 | 2159 | 12  | 8  | -8 |
| 160 | 33  | -10 | -32 | 1160 | 54  | -34 | -17 | 2160 | 6   | 8  | -8 |
| 161 | 27  | -10 | -32 | 1161 | 48  | -34 | -17 | 2161 | 0   | 8  | -8 |
| 162 | 21  | -10 | -32 | 1162 | 12  | -34 | -17 | 2162 | -6  | 8  | -8 |
| 163 | 15  | -10 | -32 | 1163 | 42  | -31 | -17 | 2163 | -15 | 8  | -8 |
| 164 | -15 | -10 | -32 | 1164 | 36  | -31 | -17 | 2164 | -24 | 11 | -8 |
| 165 | -21 | -10 | -32 | 1165 | 0   | -31 | -17 | 2165 | -30 | 11 | -8 |
| 166 | -27 | -10 | -32 | 1166 | -6  | -31 | -17 | 2166 | -36 | 11 | -8 |
| 167 | 57  | -7  | -32 | 1167 | -12 | -31 | -17 | 2167 | -42 | 11 | -8 |
| 168 | -33 | -7  | -32 | 1168 | -18 | -31 | -17 | 2168 | -48 | 11 | -8 |
| 169 | -39 | -7  | -32 | 1169 | -39 | -31 | -17 | 2169 | 51  | 14 | -8 |
| 170 | -45 | -7  | -32 | 1170 | -45 | -31 | -17 | 2170 | 42  | 14 | -8 |
| 171 | -51 | -7  | -32 | 1171 | -51 | -31 | -17 | 2171 | 36  | 14 | -8 |
| 172 | 51  | -4  | -32 | 1172 | -57 | -31 | -17 | 2172 | 30  | 14 | -8 |
| 173 | 45  | -4  | -32 | 1173 | 60  | -28 | -17 | 2173 | 24  | 14 | -8 |
| 174 | 39  | -4  | -32 | 1174 | 54  | -28 | -17 | 2174 | 18  | 14 | -8 |
| 175 | 33  | -4  | -32 | 1175 | 27  | -28 | -17 | 2175 | 12  | 14 | -8 |
| 176 | 27  | -4  | -32 | 1176 | 21  | -28 | -17 | 2176 | 6   | 14 | -8 |
| 177 | 21  | -4  | -32 | 1177 | 15  | -28 | -17 | 2177 | 0   | 14 | -8 |
| 178 | 15  | -4  | -32 | 1178 | -24 | -28 | -17 | 2178 | -6  | 14 | -8 |
| 179 | -15 | -4  | -32 | 1179 | -30 | -28 | -17 | 2179 | -15 | 14 | -8 |
| 180 | -21 | -4  | -32 | 1180 | 36  | -25 | -17 | 2180 | -24 | 17 | -8 |
| 181 | -27 | -4  | -32 | 1181 | -6  | -25 | -17 | 2181 | -30 | 17 | -8 |
| 182 | -33 | -1  | -32 | 1182 | -12 | -25 | -17 | 2182 | -36 | 17 | -8 |
| 183 | -42 | -1  | -32 | 1183 | -18 | -25 | -17 | 2183 | -42 | 17 | -8 |
| 184 | -48 | -1  | -32 | 1184 | -39 | -25 | -17 | 2184 | -48 | 17 | -8 |
| 185 | 51  | 2   | -32 | 1185 | -57 | -25 | -17 | 2185 | 48  | 20 | -8 |
| 186 | 45  | 2   | -32 | 1186 | -63 | -25 | -17 | 2186 | 42  | 20 | -8 |
| 187 | 36  | 2   | -32 | 1187 | 60  | -22 | -17 | 2187 | 36  | 20 | -8 |

|     |     |     |     |      |     |     |     |      |     |    |    |
|-----|-----|-----|-----|------|-----|-----|-----|------|-----|----|----|
| 188 | 30  | 2   | -32 | 1188 | 54  | -22 | -17 | 2188 | 30  | 20 | -8 |
| 189 | 24  | 2   | -32 | 1189 | 27  | -22 | -17 | 2189 | 24  | 20 | -8 |
| 190 | -24 | 2   | -32 | 1190 | 21  | -22 | -17 | 2190 | 18  | 20 | -8 |
| 191 | -30 | 5   | -32 | 1191 | 15  | -22 | -17 | 2191 | 12  | 20 | -8 |
| 192 | -36 | 5   | -32 | 1192 | 6   | -22 | -17 | 2192 | 6   | 20 | -8 |
| 193 | -42 | 5   | -32 | 1193 | -33 | -22 | -17 | 2193 | 0   | 20 | -8 |
| 194 | -48 | 5   | -32 | 1194 | 36  | -19 | -17 | 2194 | -6  | 20 | -8 |
| 195 | 48  | 8   | -32 | 1195 | -3  | -19 | -17 | 2195 | -15 | 20 | -8 |
| 196 | 42  | 8   | -32 | 1196 | -12 | -19 | -17 | 2196 | -36 | 23 | -8 |
| 197 | 36  | 8   | -32 | 1197 | -18 | -19 | -17 | 2197 | -42 | 23 | -8 |
| 198 | 30  | 8   | -32 | 1198 | -24 | -19 | -17 | 2198 | 48  | 26 | -8 |
| 199 | -30 | 11  | -32 | 1199 | 60  | -16 | -17 | 2199 | 42  | 26 | -8 |
| 200 | -36 | 11  | -32 | 1200 | 54  | -16 | -17 | 2200 | 36  | 26 | -8 |
| 201 | -42 | 11  | -32 | 1201 | 6   | -16 | -17 | 2201 | 30  | 26 | -8 |
| 202 | 45  | 14  | -32 | 1202 | -33 | -16 | -17 | 2202 | 6   | 26 | -8 |
| 203 | 39  | 14  | -32 | 1203 | -54 | -16 | -17 | 2203 | 0   | 26 | -8 |
| 204 | 33  | 14  | -32 | 1204 | -60 | -16 | -17 | 2204 | -6  | 26 | -8 |
| 205 | 18  | -85 | -29 | 1205 | 36  | -13 | -17 | 2205 | -33 | 29 | -8 |
| 206 | 6   | -82 | -29 | 1206 | 30  | -13 | -17 | 2206 | -39 | 29 | -8 |
| 207 | 0   | -82 | -29 | 1207 | 24  | -13 | -17 | 2207 | 48  | 32 | -8 |
| 208 | 18  | -79 | -29 | 1208 | 18  | -13 | -17 | 2208 | 42  | 32 | -8 |
| 209 | -12 | -79 | -29 | 1209 | 12  | -13 | -17 | 2209 | 36  | 32 | -8 |
| 210 | 42  | -76 | -29 | 1210 | 60  | -10 | -17 | 2210 | 30  | 32 | -8 |
| 211 | 6   | -76 | -29 | 1211 | -15 | -10 | -17 | 2211 | 6   | 32 | -8 |
| 212 | 0   | -76 | -29 | 1212 | -27 | -10 | -17 | 2212 | 0   | 32 | -8 |
| 213 | 18  | -73 | -29 | 1213 | -33 | -10 | -17 | 2213 | -6  | 32 | -8 |
| 214 | -12 | -73 | -29 | 1214 | -54 | -10 | -17 | 2214 | -48 | 32 | -8 |
| 215 | 6   | -70 | -29 | 1215 | -60 | -10 | -17 | 2215 | -33 | 35 | -8 |
| 216 | 0   | -70 | -29 | 1216 | 48  | -7  | -17 | 2216 | -39 | 35 | -8 |
| 217 | -36 | -70 | -29 | 1217 | 36  | -7  | -17 | 2217 | 48  | 38 | -8 |
| 218 | 18  | -67 | -29 | 1218 | 30  | -7  | -17 | 2218 | 42  | 38 | -8 |
| 219 | -12 | -67 | -29 | 1219 | 24  | -7  | -17 | 2219 | 36  | 38 | -8 |
| 220 | 6   | -64 | -29 | 1220 | 18  | -7  | -17 | 2220 | 30  | 38 | -8 |
| 221 | 0   | -64 | -29 | 1221 | 12  | -7  | -17 | 2221 | 9   | 38 | -8 |
| 222 | -36 | -64 | -29 | 1222 | -39 | -7  | -17 | 2222 | 0   | 38 | -8 |
| 223 | 18  | -61 | -29 | 1223 | 60  | -4  | -17 | 2223 | -6  | 38 | -8 |
| 224 | -12 | -61 | -29 | 1224 | -15 | -4  | -17 | 2224 | -39 | 41 | -8 |
| 225 | -48 | -61 | -29 | 1225 | -21 | -4  | -17 | 2225 | -45 | 41 | -8 |
| 226 | 48  | -58 | -29 | 1226 | -27 | -4  | -17 | 2226 | 9   | 44 | -8 |
| 227 | -18 | -58 | -29 | 1227 | -33 | -4  | -17 | 2227 | 3   | 44 | -8 |
| 228 | -36 | -58 | -29 | 1228 | -51 | -4  | -17 | 2228 | -6  | 44 | -8 |
| 229 | 21  | -55 | -29 | 1229 | 54  | -1  | -17 | 2229 | -12 | 44 | -8 |
| 230 | -12 | -55 | -29 | 1230 | 48  | -1  | -17 | 2230 | -39 | 47 | -8 |
| 231 | -48 | -55 | -29 | 1231 | 18  | -1  | -17 | 2231 | 9   | 50 | -8 |
| 232 | 48  | -52 | -29 | 1232 | 12  | -1  | -17 | 2232 | 0   | 50 | -8 |
| 233 | 15  | -52 | -29 | 1233 | -21 | 2   | -17 | 2233 | -6  | 50 | -8 |
| 234 | 9   | -52 | -29 | 1234 | -27 | 2   | -17 | 2234 | -12 | 50 | -8 |

|     |     |     |     |      |     |    |     |      |     |     |    |
|-----|-----|-----|-----|------|-----|----|-----|------|-----|-----|----|
| 235 | 3   | -52 | -29 | 1235 | -33 | 2  | -17 | 2235 | 39  | 53  | -8 |
| 236 | -18 | -52 | -29 | 1236 | -45 | 2  | -17 | 2236 | -33 | 53  | -8 |
| 237 | 24  | -49 | -29 | 1237 | -51 | 2  | -17 | 2237 | -39 | 53  | -8 |
| 238 | -12 | -49 | -29 | 1238 | 54  | 5  | -17 | 2238 | 6   | 56  | -8 |
| 239 | -48 | -49 | -29 | 1239 | 48  | 5  | -17 | 2239 | 0   | 56  | -8 |
| 240 | 18  | -46 | -29 | 1240 | 42  | 5  | -17 | 2240 | -6  | 56  | -8 |
| 241 | 3   | -46 | -29 | 1241 | 33  | 5  | -17 | 2241 | -12 | 56  | -8 |
| 242 | -3  | -46 | -29 | 1242 | 27  | 5  | -17 | 2242 | 30  | 59  | -8 |
| 243 | -18 | -46 | -29 | 1243 | 21  | 5  | -17 | 2243 | -24 | 59  | -8 |
| 244 | -33 | -46 | -29 | 1244 | 9   | 5  | -17 | 2244 | -30 | 59  | -8 |
| 245 | 42  | -43 | -29 | 1245 | -6  | 5  | -17 | 2245 | 24  | 62  | -8 |
| 246 | -12 | -43 | -29 | 1246 | -12 | 5  | -17 | 2246 | 18  | 62  | -8 |
| 247 | 36  | -40 | -29 | 1247 | -24 | 8  | -17 | 2247 | 12  | 62  | -8 |
| 248 | 18  | -40 | -29 | 1248 | -33 | 8  | -17 | 2248 | 6   | 62  | -8 |
| 249 | 12  | -40 | -29 | 1249 | -45 | 8  | -17 | 2249 | 0   | 62  | -8 |
| 250 | -39 | -40 | -29 | 1250 | -51 | 8  | -17 | 2250 | -6  | 62  | -8 |
| 251 | 0   | -37 | -29 | 1251 | 33  | 11 | -17 | 2251 | -12 | 62  | -8 |
| 252 | -6  | -37 | -29 | 1252 | 27  | 11 | -17 | 2252 | -18 | 62  | -8 |
| 253 | -12 | -37 | -29 | 1253 | 21  | 11 | -17 | 2253 | -6  | -97 | -5 |
| 254 | -18 | -37 | -29 | 1254 | 15  | 11 | -17 | 2254 | -15 | -97 | -5 |
| 255 | 36  | -34 | -29 | 1255 | 9   | 11 | -17 | 2255 | 18  | -94 | -5 |
| 256 | 18  | -34 | -29 | 1256 | -6  | 11 | -17 | 2256 | 12  | -94 | -5 |
| 257 | 12  | -34 | -29 | 1257 | -12 | 11 | -17 | 2257 | 3   | -94 | -5 |
| 258 | -30 | -34 | -29 | 1258 | 3   | 14 | -17 | 2258 | -21 | -94 | -5 |
| 259 | -36 | -34 | -29 | 1259 | -21 | 14 | -17 | 2259 | -27 | -94 | -5 |
| 260 | 30  | -31 | -29 | 1260 | -27 | 14 | -17 | 2260 | -6  | -91 | -5 |
| 261 | 0   | -31 | -29 | 1261 | -33 | 14 | -17 | 2261 | -12 | -91 | -5 |
| 262 | -6  | -31 | -29 | 1262 | -39 | 14 | -17 | 2262 | -33 | -91 | -5 |
| 263 | -12 | -31 | -29 | 1263 | -45 | 14 | -17 | 2263 | 36  | -88 | -5 |
| 264 | -18 | -31 | -29 | 1264 | 45  | 17 | -17 | 2264 | 27  | -88 | -5 |
| 265 | 45  | -28 | -29 | 1265 | 39  | 17 | -17 | 2265 | 18  | -88 | -5 |
| 266 | 39  | -28 | -29 | 1266 | 33  | 17 | -17 | 2266 | 9   | -88 | -5 |
| 267 | 18  | -28 | -29 | 1267 | 27  | 17 | -17 | 2267 | 3   | -88 | -5 |
| 268 | -24 | -28 | -29 | 1268 | 21  | 17 | -17 | 2268 | -6  | -85 | -5 |
| 269 | -30 | -28 | -29 | 1269 | 15  | 17 | -17 | 2269 | -12 | -85 | -5 |
| 270 | -36 | -28 | -29 | 1270 | -3  | 17 | -17 | 2270 | -33 | -85 | -5 |
| 271 | -42 | -28 | -29 | 1271 | -12 | 17 | -17 | 2271 | 18  | -82 | -5 |
| 272 | -48 | -28 | -29 | 1272 | -27 | 20 | -17 | 2272 | 9   | -82 | -5 |
| 273 | -54 | -28 | -29 | 1273 | -33 | 20 | -17 | 2273 | 3   | -82 | -5 |
| 274 | 57  | -25 | -29 | 1274 | -39 | 20 | -17 | 2274 | -42 | -82 | -5 |
| 275 | 30  | -25 | -29 | 1275 | 39  | 23 | -17 | 2275 | 24  | -79 | -5 |
| 276 | 24  | -25 | -29 | 1276 | 33  | 23 | -17 | 2276 | -3  | -79 | -5 |
| 277 | -21 | -22 | -29 | 1277 | 27  | 23 | -17 | 2277 | -15 | -79 | -5 |
| 278 | -36 | -22 | -29 | 1278 | -9  | 23 | -17 | 2278 | 45  | -76 | -5 |
| 279 | -42 | -22 | -29 | 1279 | 21  | 26 | -17 | 2279 | 39  | -76 | -5 |
| 280 | -48 | -22 | -29 | 1280 | 15  | 26 | -17 | 2280 | -42 | -76 | -5 |
| 281 | -54 | -22 | -29 | 1281 | -18 | 26 | -17 | 2281 | 24  | -73 | -5 |

|     |     |     |     |      |     |     |     |      |     |     |    |
|-----|-----|-----|-----|------|-----|-----|-----|------|-----|-----|----|
| 282 | 48  | -19 | -29 | 1282 | -24 | 26  | -17 | 2282 | 18  | -73 | -5 |
| 283 | 42  | -19 | -29 | 1283 | -30 | 26  | -17 | 2283 | 12  | -73 | -5 |
| 284 | 36  | -19 | -29 | 1284 | 30  | 29  | -17 | 2284 | 6   | -73 | -5 |
| 285 | 30  | -19 | -29 | 1285 | -9  | 29  | -17 | 2285 | 0   | -73 | -5 |
| 286 | 24  | -19 | -29 | 1286 | 24  | 32  | -17 | 2286 | -9  | -73 | -5 |
| 287 | 18  | -19 | -29 | 1287 | 12  | 32  | -17 | 2287 | -15 | -73 | -5 |
| 288 | 12  | -19 | -29 | 1288 | 6   | 32  | -17 | 2288 | -27 | -73 | -5 |
| 289 | 3   | -19 | -29 | 1289 | -18 | 32  | -17 | 2289 | -42 | -70 | -5 |
| 290 | -3  | -19 | -29 | 1290 | -24 | 32  | -17 | 2290 | -51 | -70 | -5 |
| 291 | 60  | -16 | -29 | 1291 | -3  | 35  | -17 | 2291 | 51  | -67 | -5 |
| 292 | -36 | -16 | -29 | 1292 | -9  | 35  | -17 | 2292 | 45  | -67 | -5 |
| 293 | -42 | -16 | -29 | 1293 | 21  | 38  | -17 | 2293 | 27  | -67 | -5 |
| 294 | -48 | -16 | -29 | 1294 | 12  | 38  | -17 | 2294 | 18  | -67 | -5 |
| 295 | -54 | -16 | -29 | 1295 | 6   | 38  | -17 | 2295 | 12  | -67 | -5 |
| 296 | 48  | -13 | -29 | 1296 | -18 | 38  | -17 | 2296 | 6   | -67 | -5 |
| 297 | 42  | -13 | -29 | 1297 | -3  | 41  | -17 | 2297 | 0   | -67 | -5 |
| 298 | 36  | -13 | -29 | 1298 | -9  | 41  | -17 | 2298 | -9  | -67 | -5 |
| 299 | 30  | -13 | -29 | 1299 | 18  | 44  | -17 | 2299 | -18 | -67 | -5 |
| 300 | 24  | -13 | -29 | 1300 | -18 | 44  | -17 | 2300 | -30 | -67 | -5 |
| 301 | 18  | -13 | -29 | 1301 | 6   | 47  | -17 | 2301 | 45  | -61 | -5 |
| 302 | -18 | -13 | -29 | 1302 | -3  | 47  | -17 | 2302 | 27  | -61 | -5 |
| 303 | -24 | -13 | -29 | 1303 | -9  | 47  | -17 | 2303 | 18  | -61 | -5 |
| 304 | 60  | -10 | -29 | 1304 | 15  | 50  | -17 | 2304 | 12  | -61 | -5 |
| 305 | -36 | -10 | -29 | 1305 | 3   | 53  | -17 | 2305 | 6   | -61 | -5 |
| 306 | -42 | -10 | -29 | 1306 | -3  | 53  | -17 | 2306 | 0   | -61 | -5 |
| 307 | -48 | -10 | -29 | 1307 | -9  | 53  | -17 | 2307 | -12 | -61 | -5 |
| 308 | -54 | -10 | -29 | 1308 | 9   | 59  | -17 | 2308 | -18 | -61 | -5 |
| 309 | 48  | -7  | -29 | 1309 | -12 | -97 | -14 | 2309 | -45 | -61 | -5 |
| 310 | 42  | -7  | -29 | 1310 | -18 | -97 | -14 | 2310 | -51 | -61 | -5 |
| 311 | 36  | -7  | -29 | 1311 | 24  | -94 | -14 | 2311 | 57  | -58 | -5 |
| 312 | 30  | -7  | -29 | 1312 | 18  | -94 | -14 | 2312 | -24 | -58 | -5 |
| 313 | 24  | -7  | -29 | 1313 | -3  | -94 | -14 | 2313 | -30 | -58 | -5 |
| 314 | 18  | -7  | -29 | 1314 | -27 | -94 | -14 | 2314 | -57 | -58 | -5 |
| 315 | -18 | -7  | -29 | 1315 | 30  | -91 | -14 | 2315 | 51  | -55 | -5 |
| 316 | -24 | -7  | -29 | 1316 | 6   | -91 | -14 | 2316 | 45  | -55 | -5 |
| 317 | -36 | -4  | -29 | 1317 | -12 | -91 | -14 | 2317 | 24  | -55 | -5 |
| 318 | -54 | -4  | -29 | 1318 | -18 | -91 | -14 | 2318 | 18  | -55 | -5 |
| 319 | 54  | -1  | -29 | 1319 | 21  | -88 | -14 | 2319 | 12  | -55 | -5 |
| 320 | 48  | -1  | -29 | 1320 | 15  | -88 | -14 | 2320 | 6   | -55 | -5 |
| 321 | 18  | -1  | -29 | 1321 | -3  | -88 | -14 | 2321 | 0   | -55 | -5 |
| 322 | 12  | -1  | -29 | 1322 | -27 | -88 | -14 | 2322 | -6  | -55 | -5 |
| 323 | -18 | -1  | -29 | 1323 | -12 | -85 | -14 | 2323 | -12 | -55 | -5 |
| 324 | -45 | 2   | -29 | 1324 | -18 | -85 | -14 | 2324 | 57  | -52 | -5 |
| 325 | -51 | 2   | -29 | 1325 | 39  | -82 | -14 | 2325 | -18 | -52 | -5 |
| 326 | 33  | 5   | -29 | 1326 | 27  | -82 | -14 | 2326 | -24 | -52 | -5 |
| 327 | 27  | 5   | -29 | 1327 | 21  | -82 | -14 | 2327 | -30 | -52 | -5 |
| 328 | 21  | 5   | -29 | 1328 | 15  | -82 | -14 | 2328 | -51 | -52 | -5 |

|     |     |     |     |      |     |     |     |      |     |     |    |
|-----|-----|-----|-----|------|-----|-----|-----|------|-----|-----|----|
| 329 | -27 | 8   | -29 | 1329 | 9   | -82 | -14 | 2329 | -57 | -52 | -5 |
| 330 | -33 | 8   | -29 | 1330 | 3   | -82 | -14 | 2330 | 51  | -49 | -5 |
| 331 | -39 | 8   | -29 | 1331 | -27 | -82 | -14 | 2331 | 30  | -49 | -5 |
| 332 | -45 | 8   | -29 | 1332 | -36 | -82 | -14 | 2332 | 24  | -49 | -5 |
| 333 | -33 | 14  | -29 | 1333 | -12 | -79 | -14 | 2333 | 18  | -49 | -5 |
| 334 | -39 | 14  | -29 | 1334 | -42 | -79 | -14 | 2334 | 12  | -49 | -5 |
| 335 | -45 | 14  | -29 | 1335 | 42  | -76 | -14 | 2335 | 6   | -49 | -5 |
| 336 | 3   | 35  | -29 | 1336 | 33  | -76 | -14 | 2336 | 0   | -49 | -5 |
| 337 | 3   | 41  | -29 | 1337 | 27  | -76 | -14 | 2337 | -6  | -49 | -5 |
| 338 | 24  | -88 | -26 | 1338 | 21  | -76 | -14 | 2338 | -12 | -49 | -5 |
| 339 | 15  | -88 | -26 | 1339 | 15  | -76 | -14 | 2339 | 63  | -46 | -5 |
| 340 | 9   | -88 | -26 | 1340 | 9   | -76 | -14 | 2340 | 57  | -46 | -5 |
| 341 | 3   | -88 | -26 | 1341 | 0   | -76 | -14 | 2341 | -18 | -46 | -5 |
| 342 | -3  | -88 | -26 | 1342 | -6  | -76 | -14 | 2342 | -24 | -46 | -5 |
| 343 | -9  | -88 | -26 | 1343 | -24 | -76 | -14 | 2343 | -30 | -46 | -5 |
| 344 | -15 | -88 | -26 | 1344 | -30 | -76 | -14 | 2344 | 30  | -43 | -5 |
| 345 | -21 | -88 | -26 | 1345 | -36 | -76 | -14 | 2345 | 24  | -43 | -5 |
| 346 | 30  | -85 | -26 | 1346 | -15 | -73 | -14 | 2346 | 18  | -43 | -5 |
| 347 | -27 | -85 | -26 | 1347 | -42 | -73 | -14 | 2347 | 12  | -43 | -5 |
| 348 | 24  | -82 | -26 | 1348 | 39  | -70 | -14 | 2348 | -12 | -43 | -5 |
| 349 | 15  | -82 | -26 | 1349 | 30  | -70 | -14 | 2349 | -54 | -43 | -5 |
| 350 | -6  | -82 | -26 | 1350 | 21  | -70 | -14 | 2350 | -60 | -43 | -5 |
| 351 | -15 | -82 | -26 | 1351 | 15  | -70 | -14 | 2351 | 66  | -40 | -5 |
| 352 | -21 | -82 | -26 | 1352 | 9   | -70 | -14 | 2352 | 60  | -40 | -5 |
| 353 | -33 | -82 | -26 | 1353 | 0   | -70 | -14 | 2353 | 54  | -40 | -5 |
| 354 | 36  | -79 | -26 | 1354 | -6  | -70 | -14 | 2354 | 30  | -37 | -5 |
| 355 | 30  | -79 | -26 | 1355 | -36 | -70 | -14 | 2355 | 24  | -37 | -5 |
| 356 | 9   | -79 | -26 | 1356 | 48  | -67 | -14 | 2356 | 12  | -37 | -5 |
| 357 | 3   | -79 | -26 | 1357 | -15 | -67 | -14 | 2357 | -12 | -37 | -5 |
| 358 | -27 | -79 | -26 | 1358 | -24 | -67 | -14 | 2358 | -18 | -37 | -5 |
| 359 | 24  | -76 | -26 | 1359 | 42  | -64 | -14 | 2359 | -30 | -37 | -5 |
| 360 | 15  | -76 | -26 | 1360 | 36  | -64 | -14 | 2360 | -51 | -37 | -5 |
| 361 | -6  | -76 | -26 | 1361 | 30  | -64 | -14 | 2361 | -57 | -37 | -5 |
| 362 | -15 | -76 | -26 | 1362 | 21  | -64 | -14 | 2362 | -63 | -37 | -5 |
| 363 | -21 | -76 | -26 | 1363 | 15  | -64 | -14 | 2363 | 54  | -34 | -5 |
| 364 | -33 | -76 | -26 | 1364 | 9   | -64 | -14 | 2364 | 63  | -31 | -5 |
| 365 | -39 | -76 | -26 | 1365 | 0   | -64 | -14 | 2365 | 30  | -31 | -5 |
| 366 | 39  | -73 | -26 | 1366 | -6  | -64 | -14 | 2366 | 24  | -31 | -5 |
| 367 | 33  | -73 | -26 | 1367 | -36 | -64 | -14 | 2367 | 15  | -31 | -5 |
| 368 | 9   | -73 | -26 | 1368 | -42 | -64 | -14 | 2368 | 6   | -31 | -5 |
| 369 | 3   | -73 | -26 | 1369 | -48 | -64 | -14 | 2369 | 0   | -31 | -5 |
| 370 | -27 | -73 | -26 | 1370 | 54  | -61 | -14 | 2370 | -6  | -31 | -5 |
| 371 | 45  | -70 | -26 | 1371 | -18 | -61 | -14 | 2371 | -12 | -31 | -5 |
| 372 | 27  | -70 | -26 | 1372 | -27 | -61 | -14 | 2372 | -18 | -31 | -5 |
| 373 | 21  | -70 | -26 | 1373 | -54 | -61 | -14 | 2373 | -48 | -31 | -5 |
| 374 | 15  | -70 | -26 | 1374 | 42  | -58 | -14 | 2374 | -57 | -31 | -5 |
| 375 | -6  | -70 | -26 | 1375 | 36  | -58 | -14 | 2375 | -63 | -31 | -5 |



|     |     |     |     |      |     |     |     |      |     |     |    |
|-----|-----|-----|-----|------|-----|-----|-----|------|-----|-----|----|
| 376 | -15 | -70 | -26 | 1376 | 27  | -58 | -14 | 2376 | 54  | -28 | -5 |
| 377 | -21 | -70 | -26 | 1377 | 21  | -58 | -14 | 2377 | 48  | -28 | -5 |
| 378 | -42 | -70 | -26 | 1378 | 15  | -58 | -14 | 2378 | -24 | -28 | -5 |
| 379 | 39  | -67 | -26 | 1379 | 9   | -58 | -14 | 2379 | 21  | -25 | -5 |
| 380 | 33  | -67 | -26 | 1380 | 3   | -58 | -14 | 2380 | 12  | -25 | -5 |
| 381 | 9   | -67 | -26 | 1381 | -3  | -58 | -14 | 2381 | 6   | -25 | -5 |
| 382 | 3   | -67 | -26 | 1382 | -9  | -58 | -14 | 2382 | 0   | -25 | -5 |
| 383 | -27 | -67 | -26 | 1383 | -36 | -58 | -14 | 2383 | -6  | -25 | -5 |
| 384 | -33 | -67 | -26 | 1384 | -42 | -58 | -14 | 2384 | -12 | -25 | -5 |
| 385 | 48  | -64 | -26 | 1385 | 51  | -55 | -14 | 2385 | -18 | -25 | -5 |
| 386 | 27  | -64 | -26 | 1386 | -21 | -55 | -14 | 2386 | -48 | -25 | -5 |
| 387 | 21  | -64 | -26 | 1387 | -27 | -55 | -14 | 2387 | -57 | -25 | -5 |
| 388 | 15  | -64 | -26 | 1388 | 60  | -52 | -14 | 2388 | -63 | -25 | -5 |
| 389 | -6  | -64 | -26 | 1389 | 36  | -52 | -14 | 2389 | 66  | -22 | -5 |
| 390 | -15 | -64 | -26 | 1390 | 27  | -52 | -14 | 2390 | 60  | -22 | -5 |
| 391 | -21 | -64 | -26 | 1391 | 21  | -52 | -14 | 2391 | 54  | -22 | -5 |
| 392 | -42 | -64 | -26 | 1392 | 15  | -52 | -14 | 2392 | 48  | -22 | -5 |
| 393 | 42  | -61 | -26 | 1393 | 9   | -52 | -14 | 2393 | 12  | -19 | -5 |
| 394 | 36  | -61 | -26 | 1394 | 3   | -52 | -14 | 2394 | 6   | -19 | -5 |
| 395 | 9   | -61 | -26 | 1395 | -3  | -52 | -14 | 2395 | 0   | -19 | -5 |
| 396 | 3   | -61 | -26 | 1396 | -9  | -52 | -14 | 2396 | -12 | -19 | -5 |
| 397 | -27 | -61 | -26 | 1397 | -39 | -52 | -14 | 2397 | -36 | -19 | -5 |
| 398 | -33 | -61 | -26 | 1398 | -45 | -52 | -14 | 2398 | -42 | -19 | -5 |
| 399 | 30  | -58 | -26 | 1399 | -51 | -52 | -14 | 2399 | -48 | -19 | -5 |
| 400 | 24  | -58 | -26 | 1400 | -57 | -52 | -14 | 2400 | -57 | -19 | -5 |
| 401 | 15  | -58 | -26 | 1401 | 51  | -49 | -14 | 2401 | 60  | -16 | -5 |
| 402 | -3  | -58 | -26 | 1402 | 45  | -49 | -14 | 2402 | 54  | -16 | -5 |
| 403 | -9  | -58 | -26 | 1403 | -21 | -49 | -14 | 2403 | 48  | -16 | -5 |
| 404 | -42 | -58 | -26 | 1404 | -27 | -49 | -14 | 2404 | 42  | -16 | -5 |
| 405 | -51 | -58 | -26 | 1405 | 60  | -46 | -14 | 2405 | 36  | -13 | -5 |
| 406 | 51  | -55 | -26 | 1406 | 33  | -46 | -14 | 2406 | 30  | -13 | -5 |
| 407 | 45  | -55 | -26 | 1407 | 27  | -46 | -14 | 2407 | 6   | -13 | -5 |
| 408 | 39  | -55 | -26 | 1408 | 21  | -46 | -14 | 2408 | 0   | -13 | -5 |
| 409 | 6   | -55 | -26 | 1409 | 15  | -46 | -14 | 2409 | -36 | -13 | -5 |
| 410 | -21 | -55 | -26 | 1410 | 9   | -46 | -14 | 2410 | -48 | -13 | -5 |
| 411 | -27 | -55 | -26 | 1411 | 3   | -46 | -14 | 2411 | -54 | -13 | -5 |
| 412 | -33 | -55 | -26 | 1412 | -3  | -46 | -14 | 2412 | 60  | -10 | -5 |
| 413 | 33  | -52 | -26 | 1413 | -9  | -46 | -14 | 2413 | 54  | -10 | -5 |
| 414 | 27  | -52 | -26 | 1414 | -39 | -46 | -14 | 2414 | -27 | -10 | -5 |
| 415 | -3  | -52 | -26 | 1415 | -45 | -46 | -14 | 2415 | 48  | -7  | -5 |
| 416 | -9  | -52 | -26 | 1416 | -51 | -46 | -14 | 2416 | 42  | -7  | -5 |
| 417 | -39 | -52 | -26 | 1417 | -57 | -46 | -14 | 2417 | 36  | -7  | -5 |
| 418 | -45 | -52 | -26 | 1418 | 51  | -43 | -14 | 2418 | 30  | -7  | -5 |
| 419 | -51 | -52 | -26 | 1419 | 45  | -43 | -14 | 2419 | 24  | -7  | -5 |
| 420 | 51  | -49 | -26 | 1420 | -21 | -43 | -14 | 2420 | 6   | -7  | -5 |
| 421 | 45  | -49 | -26 | 1421 | -27 | -43 | -14 | 2421 | 0   | -7  | -5 |
| 422 | 39  | -49 | -26 | 1422 | 39  | -40 | -14 | 2422 | -6  | -7  | -5 |

|     |     |     |     |      |     |     |     |      |     |    |    |
|-----|-----|-----|-----|------|-----|-----|-----|------|-----|----|----|
| 423 | 12  | -49 | -26 | 1423 | 33  | -40 | -14 | 2423 | -36 | -7 | -5 |
| 424 | 6   | -49 | -26 | 1424 | 24  | -40 | -14 | 2424 | -54 | -7 | -5 |
| 425 | -21 | -49 | -26 | 1425 | 15  | -40 | -14 | 2425 | 60  | -4 | -5 |
| 426 | -27 | -49 | -26 | 1426 | 9   | -40 | -14 | 2426 | -27 | -4 | -5 |
| 427 | 33  | -46 | -26 | 1427 | 3   | -40 | -14 | 2427 | 54  | -1 | -5 |
| 428 | 27  | -46 | -26 | 1428 | -3  | -40 | -14 | 2428 | 48  | -1 | -5 |
| 429 | -9  | -46 | -26 | 1429 | -9  | -40 | -14 | 2429 | 42  | -1 | -5 |
| 430 | -39 | -46 | -26 | 1430 | -15 | -40 | -14 | 2430 | 36  | -1 | -5 |
| 431 | -45 | -46 | -26 | 1431 | -33 | -40 | -14 | 2431 | 30  | -1 | -5 |
| 432 | -51 | -46 | -26 | 1432 | -39 | -40 | -14 | 2432 | 18  | -1 | -5 |
| 433 | 51  | -43 | -26 | 1433 | -45 | -40 | -14 | 2433 | 12  | -1 | -5 |
| 434 | 21  | -43 | -26 | 1434 | -51 | -40 | -14 | 2434 | -6  | -1 | -5 |
| 435 | 15  | -43 | -26 | 1435 | 51  | -37 | -14 | 2435 | -12 | -1 | -5 |
| 436 | 9   | -43 | -26 | 1436 | -24 | -37 | -14 | 2436 | -18 | -1 | -5 |
| 437 | 0   | -43 | -26 | 1437 | 39  | -34 | -14 | 2437 | -54 | -1 | -5 |
| 438 | -21 | -43 | -26 | 1438 | 33  | -34 | -14 | 2438 | -27 | 2  | -5 |
| 439 | -27 | -43 | -26 | 1439 | 24  | -34 | -14 | 2439 | -33 | 2  | -5 |
| 440 | 45  | -40 | -26 | 1440 | 18  | -34 | -14 | 2440 | -39 | 2  | -5 |
| 441 | 30  | -40 | -26 | 1441 | 6   | -34 | -14 | 2441 | -45 | 2  | -5 |
| 442 | -9  | -40 | -26 | 1442 | -3  | -34 | -14 | 2442 | 54  | 5  | -5 |
| 443 | -15 | -40 | -26 | 1443 | -9  | -34 | -14 | 2443 | 48  | 5  | -5 |
| 444 | -33 | -40 | -26 | 1444 | -15 | -34 | -14 | 2444 | 42  | 5  | -5 |
| 445 | -45 | -40 | -26 | 1445 | -33 | -34 | -14 | 2445 | 36  | 5  | -5 |
| 446 | -51 | -40 | -26 | 1446 | -54 | -34 | -14 | 2446 | 27  | 5  | -5 |
| 447 | 51  | -37 | -26 | 1447 | -60 | -34 | -14 | 2447 | 21  | 5  | -5 |
| 448 | 39  | -37 | -26 | 1448 | 63  | -31 | -14 | 2448 | 9   | 5  | -5 |
| 449 | 24  | -37 | -26 | 1449 | 57  | -31 | -14 | 2449 | 3   | 5  | -5 |
| 450 | 15  | -37 | -26 | 1450 | -27 | -31 | -14 | 2450 | -3  | 5  | -5 |
| 451 | 9   | -37 | -26 | 1451 | 39  | -28 | -14 | 2451 | -12 | 5  | -5 |
| 452 | -24 | -37 | -26 | 1452 | 33  | -28 | -14 | 2452 | -18 | 5  | -5 |
| 453 | 45  | -34 | -26 | 1453 | 9   | -28 | -14 | 2453 | -27 | 8  | -5 |
| 454 | 3   | -34 | -26 | 1454 | 3   | -28 | -14 | 2454 | -33 | 8  | -5 |
| 455 | -3  | -34 | -26 | 1455 | -3  | -28 | -14 | 2455 | -39 | 8  | -5 |
| 456 | -9  | -34 | -26 | 1456 | -9  | -28 | -14 | 2456 | -45 | 8  | -5 |
| 457 | -15 | -34 | -26 | 1457 | -15 | -28 | -14 | 2457 | -51 | 8  | -5 |
| 458 | -42 | -34 | -26 | 1458 | -36 | -28 | -14 | 2458 | 54  | 11 | -5 |
| 459 | -48 | -34 | -26 | 1459 | -54 | -28 | -14 | 2459 | 48  | 11 | -5 |
| 460 | -54 | -34 | -26 | 1460 | -60 | -28 | -14 | 2460 | 33  | 11 | -5 |
| 461 | 57  | -31 | -26 | 1461 | 63  | -25 | -14 | 2461 | 27  | 11 | -5 |
| 462 | 51  | -31 | -26 | 1462 | 57  | -25 | -14 | 2462 | 21  | 11 | -5 |
| 463 | 24  | -31 | -26 | 1463 | 24  | -25 | -14 | 2463 | 15  | 11 | -5 |
| 464 | 15  | -31 | -26 | 1464 | 18  | -25 | -14 | 2464 | 9   | 11 | -5 |
| 465 | 9   | -31 | -26 | 1465 | -27 | -25 | -14 | 2465 | 3   | 11 | -5 |
| 466 | -27 | -31 | -26 | 1466 | 39  | -22 | -14 | 2466 | -3  | 11 | -5 |
| 467 | -33 | -31 | -26 | 1467 | 33  | -22 | -14 | 2467 | -9  | 11 | -5 |
| 468 | 33  | -28 | -26 | 1468 | 0   | -22 | -14 | 2468 | -18 | 11 | -5 |
| 469 | 3   | -28 | -26 | 1469 | -9  | -22 | -14 | 2469 | -27 | 14 | -5 |

|     |     |     |     |      |     |     |     |      |     |    |    |
|-----|-----|-----|-----|------|-----|-----|-----|------|-----|----|----|
| 470 | -3  | -28 | -26 | 1470 | -15 | -22 | -14 | 2470 | -33 | 14 | -5 |
| 471 | -9  | -28 | -26 | 1471 | -21 | -22 | -14 | 2471 | -39 | 14 | -5 |
| 472 | -15 | -28 | -26 | 1472 | -54 | -22 | -14 | 2472 | -45 | 14 | -5 |
| 473 | 51  | -25 | -26 | 1473 | -60 | -22 | -14 | 2473 | 45  | 17 | -5 |
| 474 | 42  | -25 | -26 | 1474 | 63  | -19 | -14 | 2474 | 39  | 17 | -5 |
| 475 | 15  | -25 | -26 | 1475 | 57  | -19 | -14 | 2475 | 33  | 17 | -5 |
| 476 | 9   | -25 | -26 | 1476 | 51  | -19 | -14 | 2476 | 27  | 17 | -5 |
| 477 | -27 | -25 | -26 | 1477 | 24  | -19 | -14 | 2477 | 21  | 17 | -5 |
| 478 | -33 | -25 | -26 | 1478 | 18  | -19 | -14 | 2478 | 15  | 17 | -5 |
| 479 | -39 | -25 | -26 | 1479 | 12  | -19 | -14 | 2479 | 9   | 17 | -5 |
| 480 | -45 | -25 | -26 | 1480 | -30 | -19 | -14 | 2480 | 3   | 17 | -5 |
| 481 | -51 | -25 | -26 | 1481 | -36 | -19 | -14 | 2481 | -3  | 17 | -5 |
| 482 | -57 | -25 | -26 | 1482 | 33  | -16 | -14 | 2482 | -9  | 17 | -5 |
| 483 | 60  | -22 | -26 | 1483 | 0   | -16 | -14 | 2483 | -18 | 17 | -5 |
| 484 | 33  | -22 | -26 | 1484 | -6  | -16 | -14 | 2484 | -27 | 20 | -5 |
| 485 | 27  | -22 | -26 | 1485 | -15 | -16 | -14 | 2485 | -33 | 20 | -5 |
| 486 | 21  | -22 | -26 | 1486 | -21 | -16 | -14 | 2486 | -39 | 20 | -5 |
| 487 | 0   | -22 | -26 | 1487 | 63  | -13 | -14 | 2487 | -45 | 20 | -5 |
| 488 | 54  | -19 | -26 | 1488 | 57  | -13 | -14 | 2488 | 45  | 23 | -5 |
| 489 | -15 | -19 | -26 | 1489 | 51  | -13 | -14 | 2489 | 39  | 23 | -5 |
| 490 | -24 | -19 | -26 | 1490 | -30 | -13 | -14 | 2490 | 33  | 23 | -5 |
| 491 | -30 | -19 | -26 | 1491 | -36 | -13 | -14 | 2491 | 27  | 23 | -5 |
| 492 | -39 | -19 | -26 | 1492 | -48 | -13 | -14 | 2492 | 15  | 23 | -5 |
| 493 | -45 | -19 | -26 | 1493 | -57 | -13 | -14 | 2493 | 9   | 23 | -5 |
| 494 | -51 | -19 | -26 | 1494 | 45  | -10 | -14 | 2494 | 3   | 23 | -5 |
| 495 | -57 | -19 | -26 | 1495 | 33  | -10 | -14 | 2495 | -3  | 23 | -5 |
| 496 | 45  | -16 | -26 | 1496 | 27  | -10 | -14 | 2496 | -9  | 23 | -5 |
| 497 | 39  | -16 | -26 | 1497 | 21  | -10 | -14 | 2497 | -27 | 26 | -5 |
| 498 | 33  | -16 | -26 | 1498 | 15  | -10 | -14 | 2498 | -45 | 26 | -5 |
| 499 | 27  | -16 | -26 | 1499 | 9   | -10 | -14 | 2499 | 45  | 29 | -5 |
| 500 | 21  | -16 | -26 | 1500 | 3   | -10 | -14 | 2500 | 39  | 29 | -5 |
| 501 | 15  | -16 | -26 | 1501 | -3  | -10 | -14 | 2501 | 33  | 29 | -5 |
| 502 | 57  | -13 | -26 | 1502 | -9  | -10 | -14 | 2502 | 3   | 29 | -5 |
| 503 | -30 | -13 | -26 | 1503 | -21 | -10 | -14 | 2503 | -3  | 29 | -5 |
| 504 | -39 | -13 | -26 | 1504 | -42 | -10 | -14 | 2504 | -36 | 32 | -5 |
| 505 | -45 | -13 | -26 | 1505 | 57  | -7  | -14 | 2505 | -42 | 32 | -5 |
| 506 | -51 | -13 | -26 | 1506 | -30 | -7  | -14 | 2506 | 45  | 35 | -5 |
| 507 | -57 | -13 | -26 | 1507 | -48 | -7  | -14 | 2507 | 39  | 35 | -5 |
| 508 | 51  | -10 | -26 | 1508 | -57 | -7  | -14 | 2508 | 3   | 35 | -5 |
| 509 | 45  | -10 | -26 | 1509 | 51  | -4  | -14 | 2509 | -3  | 35 | -5 |
| 510 | 39  | -10 | -26 | 1510 | 45  | -4  | -14 | 2510 | -9  | 35 | -5 |
| 511 | 33  | -10 | -26 | 1511 | 39  | -4  | -14 | 2511 | -48 | 38 | -5 |
| 512 | 27  | -10 | -26 | 1512 | 33  | -4  | -14 | 2512 | 45  | 41 | -5 |
| 513 | 21  | -10 | -26 | 1513 | 27  | -4  | -14 | 2513 | 6   | 41 | -5 |
| 514 | 15  | -10 | -26 | 1514 | 21  | -4  | -14 | 2514 | -3  | 41 | -5 |
| 515 | -15 | -10 | -26 | 1515 | 15  | -4  | -14 | 2515 | -9  | 41 | -5 |
| 516 | -21 | -10 | -26 | 1516 | 9   | -4  | -14 | 2516 | -42 | 44 | -5 |

|     |     |    |     |      |     |    |     |      |     |      |    |
|-----|-----|----|-----|------|-----|----|-----|------|-----|------|----|
| 517 | 57  | -7 | -26 | 1517 | 3   | -4 | -14 | 2517 | 45  | 47   | -5 |
| 518 | -30 | -7 | -26 | 1518 | -3  | -4 | -14 | 2518 | 39  | 47   | -5 |
| 519 | -51 | -7 | -26 | 1519 | -9  | -4 | -14 | 2519 | 12  | 47   | -5 |
| 520 | -57 | -7 | -26 | 1520 | -42 | -4 | -14 | 2520 | 6   | 47   | -5 |
| 521 | 51  | -4 | -26 | 1521 | -18 | -1 | -14 | 2521 | -3  | 47   | -5 |
| 522 | 33  | -4 | -26 | 1522 | -24 | -1 | -14 | 2522 | -9  | 47   | -5 |
| 523 | 27  | -4 | -26 | 1523 | -30 | -1 | -14 | 2523 | -36 | 50   | -5 |
| 524 | 21  | -4 | -26 | 1524 | -36 | -1 | -14 | 2524 | -42 | 50   | -5 |
| 525 | 15  | -4 | -26 | 1525 | -48 | -1 | -14 | 2525 | 33  | 53   | -5 |
| 526 | -12 | -4 | -26 | 1526 | -54 | -1 | -14 | 2526 | 3   | 53   | -5 |
| 527 | -21 | -4 | -26 | 1527 | 57  | 2  | -14 | 2527 | -3  | 53   | -5 |
| 528 | -27 | -1 | -26 | 1528 | 51  | 2  | -14 | 2528 | -9  | 53   | -5 |
| 529 | -33 | -1 | -26 | 1529 | 45  | 2  | -14 | 2529 | 27  | 56   | -5 |
| 530 | -48 | -1 | -26 | 1530 | 39  | 2  | -14 | 2530 | -27 | 56   | -5 |
| 531 | 51  | 2  | -26 | 1531 | 30  | 2  | -14 | 2531 | -36 | 56   | -5 |
| 532 | 45  | 2  | -26 | 1532 | 24  | 2  | -14 | 2532 | 21  | 59   | -5 |
| 533 | 36  | 2  | -26 | 1533 | 15  | 2  | -14 | 2533 | 9   | 59   | -5 |
| 534 | 30  | 2  | -26 | 1534 | 6   | 2  | -14 | 2534 | 3   | 59   | -5 |
| 535 | 24  | 2  | -26 | 1535 | 0   | 2  | -14 | 2535 | -3  | 59   | -5 |
| 536 | 15  | 2  | -26 | 1536 | -9  | 2  | -14 | 2536 | -9  | 59   | -5 |
| 537 | -15 | 2  | -26 | 1537 | -18 | 5  | -14 | 2537 | -27 | 62   | -5 |
| 538 | -21 | 2  | -26 | 1538 | -30 | 5  | -14 | 2538 | 15  | 65   | -5 |
| 539 | -39 | 2  | -26 | 1539 | -36 | 5  | -14 | 2539 | 9   | 65   | -5 |
| 540 | -30 | 5  | -26 | 1540 | -42 | 5  | -14 | 2540 | -9  | 65   | -5 |
| 541 | -48 | 5  | -26 | 1541 | -48 | 5  | -14 | 2541 | -15 | 65   | -5 |
| 542 | 51  | 8  | -26 | 1542 | 51  | 8  | -14 | 2542 | 18  | -100 | -2 |
| 543 | 45  | 8  | -26 | 1543 | 45  | 8  | -14 | 2543 | -9  | -100 | -2 |
| 544 | 39  | 8  | -26 | 1544 | 39  | 8  | -14 | 2544 | -18 | -100 | -2 |
| 545 | 30  | 8  | -26 | 1545 | 30  | 8  | -14 | 2545 | 24  | -97  | -2 |
| 546 | 24  | 8  | -26 | 1546 | 24  | 8  | -14 | 2546 | -24 | -97  | -2 |
| 547 | 18  | 8  | -26 | 1547 | 18  | 8  | -14 | 2547 | 30  | -94  | -2 |
| 548 | -18 | 8  | -26 | 1548 | 12  | 8  | -14 | 2548 | -3  | -94  | -2 |
| 549 | -30 | 11 | -26 | 1549 | 6   | 8  | -14 | 2549 | -9  | -94  | -2 |
| 550 | -36 | 11 | -26 | 1550 | 0   | 8  | -14 | 2550 | 21  | -91  | -2 |
| 551 | -42 | 11 | -26 | 1551 | -9  | 8  | -14 | 2551 | 15  | -91  | -2 |
| 552 | -48 | 11 | -26 | 1552 | -18 | 11 | -14 | 2552 | 6   | -91  | -2 |
| 553 | 48  | 14 | -26 | 1553 | -30 | 11 | -14 | 2553 | -3  | -88  | -2 |
| 554 | 42  | 14 | -26 | 1554 | -36 | 11 | -14 | 2554 | -9  | -88  | -2 |
| 555 | 36  | 14 | -26 | 1555 | -42 | 11 | -14 | 2555 | -15 | -88  | -2 |
| 556 | 30  | 14 | -26 | 1556 | -48 | 11 | -14 | 2556 | -30 | -88  | -2 |
| 557 | 12  | 14 | -26 | 1557 | 48  | 14 | -14 | 2557 | -36 | -88  | -2 |
| 558 | -9  | 14 | -26 | 1558 | 42  | 14 | -14 | 2558 | 39  | -85  | -2 |
| 559 | 6   | 17 | -26 | 1559 | 36  | 14 | -14 | 2559 | 33  | -85  | -2 |
| 560 | -42 | 17 | -26 | 1560 | 30  | 14 | -14 | 2560 | 15  | -85  | -2 |
| 561 | 0   | 20 | -26 | 1561 | 24  | 14 | -14 | 2561 | 6   | -85  | -2 |
| 562 | -6  | 20 | -26 | 1562 | 18  | 14 | -14 | 2562 | -9  | -82  | -2 |
| 563 | 9   | 23 | -26 | 1563 | 12  | 14 | -14 | 2563 | 42  | -79  | -2 |

|     |     |     |     |      |     |    |     |      |     |     |    |
|-----|-----|-----|-----|------|-----|----|-----|------|-----|-----|----|
| 564 | 3   | 26  | -26 | 1564 | -9  | 14 | -14 | 2564 | 15  | -79 | -2 |
| 565 | -3  | 26  | -26 | 1565 | 6   | 17 | -14 | 2565 | 6   | -79 | -2 |
| 566 | 9   | 29  | -26 | 1566 | -18 | 17 | -14 | 2566 | -39 | -79 | -2 |
| 567 | 0   | 32  | -26 | 1567 | -24 | 17 | -14 | 2567 | -45 | -79 | -2 |
| 568 | -6  | 32  | -26 | 1568 | -30 | 17 | -14 | 2568 | -6  | -76 | -2 |
| 569 | 9   | 35  | -26 | 1569 | -36 | 17 | -14 | 2569 | -12 | -76 | -2 |
| 570 | 0   | 38  | -26 | 1570 | -42 | 17 | -14 | 2570 | -18 | -76 | -2 |
| 571 | -6  | 38  | -26 | 1571 | 42  | 20 | -14 | 2571 | 48  | -73 | -2 |
| 572 | 9   | 41  | -26 | 1572 | 36  | 20 | -14 | 2572 | 42  | -73 | -2 |
| 573 | 0   | 44  | -26 | 1573 | 30  | 20 | -14 | 2573 | -45 | -73 | -2 |
| 574 | -6  | 44  | -26 | 1574 | 24  | 20 | -14 | 2574 | 21  | -70 | -2 |
| 575 | 6   | 47  | -26 | 1575 | 18  | 20 | -14 | 2575 | 15  | -70 | -2 |
| 576 | 0   | 50  | -26 | 1576 | 12  | 20 | -14 | 2576 | 9   | -70 | -2 |
| 577 | -12 | -91 | -23 | 1577 | 0   | 20 | -14 | 2577 | 3   | -70 | -2 |
| 578 | -18 | -91 | -23 | 1578 | -6  | 20 | -14 | 2578 | -3  | -70 | -2 |
| 579 | 21  | -85 | -23 | 1579 | 6   | 23 | -14 | 2579 | -12 | -70 | -2 |
| 580 | 12  | -85 | -23 | 1580 | -15 | 23 | -14 | 2580 | -21 | -70 | -2 |
| 581 | 6   | -85 | -23 | 1581 | -36 | 23 | -14 | 2581 | -45 | -67 | -2 |
| 582 | 0   | -85 | -23 | 1582 | -42 | 23 | -14 | 2582 | 54  | -64 | -2 |
| 583 | -12 | -85 | -23 | 1583 | 42  | 26 | -14 | 2583 | 48  | -64 | -2 |
| 584 | -18 | -85 | -23 | 1584 | 36  | 26 | -14 | 2584 | 42  | -64 | -2 |
| 585 | 33  | -82 | -23 | 1585 | 0   | 26 | -14 | 2585 | 24  | -64 | -2 |
| 586 | 21  | -79 | -23 | 1586 | -6  | 26 | -14 | 2586 | 15  | -64 | -2 |
| 587 | -3  | -79 | -23 | 1587 | 9   | 29 | -14 | 2587 | 9   | -64 | -2 |
| 588 | -9  | -79 | -23 | 1588 | -21 | 29 | -14 | 2588 | 3   | -64 | -2 |
| 589 | -18 | -79 | -23 | 1589 | -27 | 29 | -14 | 2589 | -3  | -64 | -2 |
| 590 | -36 | -79 | -23 | 1590 | -33 | 29 | -14 | 2590 | -15 | -64 | -2 |
| 591 | 6   | -76 | -23 | 1591 | -39 | 29 | -14 | 2591 | -21 | -64 | -2 |
| 592 | 18  | -73 | -23 | 1592 | 42  | 32 | -14 | 2592 | -54 | -64 | -2 |
| 593 | -3  | -73 | -23 | 1593 | 36  | 32 | -14 | 2593 | -27 | -61 | -2 |
| 594 | -9  | -73 | -23 | 1594 | 0   | 32 | -14 | 2594 | 48  | -58 | -2 |
| 595 | -18 | -73 | -23 | 1595 | -6  | 32 | -14 | 2595 | 21  | -58 | -2 |
| 596 | -36 | -73 | -23 | 1596 | 30  | 35 | -14 | 2596 | 15  | -58 | -2 |
| 597 | 36  | -70 | -23 | 1597 | 9   | 35 | -14 | 2597 | 9   | -58 | -2 |
| 598 | 6   | -70 | -23 | 1598 | -21 | 35 | -14 | 2598 | 3   | -58 | -2 |
| 599 | -30 | -70 | -23 | 1599 | -27 | 35 | -14 | 2599 | -3  | -58 | -2 |
| 600 | 24  | -67 | -23 | 1600 | -33 | 35 | -14 | 2600 | -9  | -58 | -2 |
| 601 | 18  | -67 | -23 | 1601 | 36  | 38 | -14 | 2601 | -15 | -58 | -2 |
| 602 | -3  | -67 | -23 | 1602 | 0   | 38 | -14 | 2602 | -48 | -58 | -2 |
| 603 | -9  | -67 | -23 | 1603 | -6  | 38 | -14 | 2603 | 60  | -55 | -2 |
| 604 | -18 | -67 | -23 | 1604 | 30  | 41 | -14 | 2604 | -21 | -55 | -2 |
| 605 | -39 | -67 | -23 | 1605 | 24  | 41 | -14 | 2605 | -27 | -55 | -2 |
| 606 | -45 | -67 | -23 | 1606 | 9   | 41 | -14 | 2606 | -54 | -55 | -2 |
| 607 | 6   | -64 | -23 | 1607 | -21 | 41 | -14 | 2607 | 48  | -52 | -2 |
| 608 | -30 | -64 | -23 | 1608 | -27 | 41 | -14 | 2608 | 27  | -52 | -2 |
| 609 | 51  | -61 | -23 | 1609 | 3   | 44 | -14 | 2609 | 21  | -52 | -2 |
| 610 | 18  | -61 | -23 | 1610 | -6  | 44 | -14 | 2610 | 15  | -52 | -2 |

|     |     |     |     |      |     |     |     |      |     |     |    |
|-----|-----|-----|-----|------|-----|-----|-----|------|-----|-----|----|
| 611 | -12 | -61 | -23 | 1611 | 27  | 47  | -14 | 2611 | 9   | -52 | -2 |
| 612 | -18 | -61 | -23 | 1612 | 21  | 47  | -14 | 2612 | 3   | -52 | -2 |
| 613 | -39 | -61 | -23 | 1613 | -21 | 47  | -14 | 2613 | -3  | -52 | -2 |
| 614 | -45 | -61 | -23 | 1614 | 9   | 50  | -14 | 2614 | -9  | -52 | -2 |
| 615 | -24 | -58 | -23 | 1615 | 0   | 50  | -14 | 2615 | 60  | -49 | -2 |
| 616 | -30 | -58 | -23 | 1616 | -6  | 50  | -14 | 2616 | -21 | -49 | -2 |
| 617 | 21  | -55 | -23 | 1617 | 21  | 53  | -14 | 2617 | -27 | -49 | -2 |
| 618 | 12  | -55 | -23 | 1618 | -18 | 53  | -14 | 2618 | -54 | -49 | -2 |
| 619 | 0   | -55 | -23 | 1619 | 15  | 56  | -14 | 2619 | -60 | -49 | -2 |
| 620 | -6  | -55 | -23 | 1620 | 6   | 56  | -14 | 2620 | 27  | -46 | -2 |
| 621 | -12 | -55 | -23 | 1621 | 0   | 56  | -14 | 2621 | 21  | -46 | -2 |
| 622 | -48 | -55 | -23 | 1622 | -6  | 56  | -14 | 2622 | 15  | -46 | -2 |
| 623 | 54  | -52 | -23 | 1623 | -12 | 56  | -14 | 2623 | 9   | -46 | -2 |
| 624 | 48  | -52 | -23 | 1624 | 12  | 62  | -14 | 2624 | -9  | -46 | -2 |
| 625 | 42  | -52 | -23 | 1625 | -6  | -97 | -11 | 2625 | -21 | -43 | -2 |
| 626 | -18 | -52 | -23 | 1626 | 12  | -94 | -11 | 2626 | -27 | -43 | -2 |
| 627 | -24 | -52 | -23 | 1627 | -15 | -94 | -11 | 2627 | 27  | -40 | -2 |
| 628 | -30 | -52 | -23 | 1628 | -21 | -94 | -11 | 2628 | 21  | -40 | -2 |
| 629 | 30  | -49 | -23 | 1629 | 0   | -91 | -11 | 2629 | 15  | -40 | -2 |
| 630 | 24  | -49 | -23 | 1630 | -6  | -91 | -11 | 2630 | 9   | -40 | -2 |
| 631 | 18  | -49 | -23 | 1631 | -30 | -91 | -11 | 2631 | -9  | -40 | -2 |
| 632 | 0   | -49 | -23 | 1632 | 36  | -88 | -11 | 2632 | -15 | -40 | -2 |
| 633 | -6  | -49 | -23 | 1633 | 27  | -88 | -11 | 2633 | -33 | -40 | -2 |
| 634 | -12 | -49 | -23 | 1634 | 9   | -88 | -11 | 2634 | 63  | -37 | -2 |
| 635 | -36 | -49 | -23 | 1635 | -15 | -88 | -11 | 2635 | 57  | -37 | -2 |
| 636 | -42 | -49 | -23 | 1636 | -21 | -88 | -11 | 2636 | 51  | -37 | -2 |
| 637 | -48 | -49 | -23 | 1637 | -36 | -88 | -11 | 2637 | -24 | -37 | -2 |
| 638 | -54 | -49 | -23 | 1638 | 18  | -85 | -11 | 2638 | 33  | -34 | -2 |
| 639 | 54  | -46 | -23 | 1639 | 0   | -85 | -11 | 2639 | 27  | -34 | -2 |
| 640 | 48  | -46 | -23 | 1640 | -6  | -85 | -11 | 2640 | 21  | -34 | -2 |
| 641 | 42  | -46 | -23 | 1641 | -30 | -85 | -11 | 2641 | 9   | -34 | -2 |
| 642 | -18 | -46 | -23 | 1642 | 33  | -82 | -11 | 2642 | -9  | -34 | -2 |
| 643 | -24 | -46 | -23 | 1643 | -15 | -82 | -11 | 2643 | -15 | -34 | -2 |
| 644 | -30 | -46 | -23 | 1644 | -21 | -82 | -11 | 2644 | -54 | -34 | -2 |
| 645 | 36  | -43 | -23 | 1645 | 24  | -79 | -11 | 2645 | -60 | -34 | -2 |
| 646 | -6  | -43 | -23 | 1646 | 18  | -79 | -11 | 2646 | 57  | -31 | -2 |
| 647 | -12 | -43 | -23 | 1647 | 12  | -79 | -11 | 2647 | 51  | -31 | -2 |
| 648 | -36 | -43 | -23 | 1648 | 6   | -79 | -11 | 2648 | 45  | -31 | -2 |
| 649 | -42 | -43 | -23 | 1649 | -3  | -79 | -11 | 2649 | -27 | -31 | -2 |
| 650 | -48 | -43 | -23 | 1650 | -33 | -79 | -11 | 2650 | 66  | -28 | -2 |
| 651 | -54 | -43 | -23 | 1651 | -18 | -76 | -11 | 2651 | 18  | -28 | -2 |
| 652 | 57  | -40 | -23 | 1652 | -45 | -76 | -11 | 2652 | 9   | -28 | -2 |
| 653 | 18  | -40 | -23 | 1653 | 45  | -73 | -11 | 2653 | 3   | -28 | -2 |
| 654 | 12  | -40 | -23 | 1654 | 36  | -73 | -11 | 2654 | -3  | -28 | -2 |
| 655 | 6   | -40 | -23 | 1655 | 24  | -73 | -11 | 2655 | -9  | -28 | -2 |
| 656 | 33  | -37 | -23 | 1656 | 18  | -73 | -11 | 2656 | -15 | -28 | -2 |
| 657 | 0   | -37 | -23 | 1657 | 12  | -73 | -11 | 2657 | -51 | -28 | -2 |

|     |     |     |     |      |     |     |     |      |     |     |    |
|-----|-----|-----|-----|------|-----|-----|-----|------|-----|-----|----|
| 658 | -6  | -37 | -23 | 1658 | 6   | -73 | -11 | 2658 | -60 | -28 | -2 |
| 659 | -12 | -37 | -23 | 1659 | -3  | -73 | -11 | 2659 | 57  | -25 | -2 |
| 660 | -18 | -37 | -23 | 1660 | -9  | -73 | -11 | 2660 | 51  | -25 | -2 |
| 661 | -30 | -37 | -23 | 1661 | -27 | -73 | -11 | 2661 | 45  | -25 | -2 |
| 662 | -36 | -37 | -23 | 1662 | -33 | -73 | -11 | 2662 | 18  | -22 | -2 |
| 663 | -57 | -37 | -23 | 1663 | -18 | -70 | -11 | 2663 | 9   | -22 | -2 |
| 664 | 60  | -34 | -23 | 1664 | -45 | -70 | -11 | 2664 | 3   | -22 | -2 |
| 665 | 54  | -34 | -23 | 1665 | 33  | -67 | -11 | 2665 | -3  | -22 | -2 |
| 666 | 27  | -34 | -23 | 1666 | 27  | -67 | -11 | 2666 | -9  | -22 | -2 |
| 667 | 21  | -34 | -23 | 1667 | 18  | -67 | -11 | 2667 | -15 | -22 | -2 |
| 668 | 12  | -34 | -23 | 1668 | 12  | -67 | -11 | 2668 | -39 | -22 | -2 |
| 669 | 42  | -31 | -23 | 1669 | 6   | -67 | -11 | 2669 | -45 | -22 | -2 |
| 670 | 36  | -31 | -23 | 1670 | -3  | -67 | -11 | 2670 | -51 | -22 | -2 |
| 671 | 0   | -31 | -23 | 1671 | -9  | -67 | -11 | 2671 | -60 | -22 | -2 |
| 672 | -6  | -31 | -23 | 1672 | -30 | -67 | -11 | 2672 | 63  | -19 | -2 |
| 673 | -12 | -31 | -23 | 1673 | -39 | -67 | -11 | 2673 | 57  | -19 | -2 |
| 674 | -18 | -31 | -23 | 1674 | -51 | -67 | -11 | 2674 | 51  | -19 | -2 |
| 675 | -39 | -31 | -23 | 1675 | 51  | -64 | -11 | 2675 | 45  | -19 | -2 |
| 676 | -45 | -31 | -23 | 1676 | -21 | -64 | -11 | 2676 | 39  | -19 | -2 |
| 677 | -51 | -31 | -23 | 1677 | 45  | -61 | -11 | 2677 | 33  | -16 | -2 |
| 678 | -57 | -31 | -23 | 1678 | 39  | -61 | -11 | 2678 | 9   | -16 | -2 |
| 679 | 60  | -28 | -23 | 1679 | 33  | -61 | -11 | 2679 | 3   | -16 | -2 |
| 680 | 54  | -28 | -23 | 1680 | 24  | -61 | -11 | 2680 | -3  | -16 | -2 |
| 681 | 48  | -28 | -23 | 1681 | 18  | -61 | -11 | 2681 | -9  | -16 | -2 |
| 682 | 27  | -28 | -23 | 1682 | 12  | -61 | -11 | 2682 | -30 | -16 | -2 |
| 683 | 21  | -28 | -23 | 1683 | 6   | -61 | -11 | 2683 | -39 | -16 | -2 |
| 684 | 12  | -28 | -23 | 1684 | -12 | -61 | -11 | 2684 | -45 | -16 | -2 |
| 685 | -24 | -28 | -23 | 1685 | -33 | -61 | -11 | 2685 | -51 | -16 | -2 |
| 686 | -30 | -28 | -23 | 1686 | -39 | -61 | -11 | 2686 | -60 | -16 | -2 |
| 687 | 36  | -25 | -23 | 1687 | -45 | -61 | -11 | 2687 | 63  | -13 | -2 |
| 688 | -6  | -25 | -23 | 1688 | 57  | -58 | -11 | 2688 | 57  | -13 | -2 |
| 689 | -18 | -25 | -23 | 1689 | -24 | -58 | -11 | 2689 | 51  | -13 | -2 |
| 690 | 48  | -22 | -23 | 1690 | -51 | -58 | -11 | 2690 | 45  | -13 | -2 |
| 691 | 12  | -22 | -23 | 1691 | 45  | -55 | -11 | 2691 | 39  | -10 | -2 |
| 692 | 6   | -22 | -23 | 1692 | 39  | -55 | -11 | 2692 | 33  | -10 | -2 |
| 693 | -36 | -22 | -23 | 1693 | 33  | -55 | -11 | 2693 | 27  | -10 | -2 |
| 694 | -42 | -22 | -23 | 1694 | 24  | -55 | -11 | 2694 | 9   | -10 | -2 |
| 695 | -48 | -22 | -23 | 1695 | 18  | -55 | -11 | 2695 | 3   | -10 | -2 |
| 696 | -54 | -22 | -23 | 1696 | 12  | -55 | -11 | 2696 | -3  | -10 | -2 |
| 697 | -60 | -22 | -23 | 1697 | 6   | -55 | -11 | 2697 | -33 | -10 | -2 |
| 698 | 63  | -19 | -23 | 1698 | 0   | -55 | -11 | 2698 | -39 | -10 | -2 |
| 699 | 42  | -19 | -23 | 1699 | -6  | -55 | -11 | 2699 | -45 | -10 | -2 |
| 700 | 36  | -19 | -23 | 1700 | -12 | -55 | -11 | 2700 | -51 | -10 | -2 |
| 701 | 30  | -19 | -23 | 1701 | -33 | -55 | -11 | 2701 | -57 | -10 | -2 |
| 702 | 24  | -19 | -23 | 1702 | 54  | -52 | -11 | 2702 | 57  | -7  | -2 |
| 703 | 18  | -19 | -23 | 1703 | -18 | -52 | -11 | 2703 | 51  | -4  | -2 |
| 704 | -3  | -19 | -23 | 1704 | -24 | -52 | -11 | 2704 | 45  | -4  | -2 |

|     |     |     |     |      |     |     |     |      |     |    |    |
|-----|-----|-----|-----|------|-----|-----|-----|------|-----|----|----|
| 705 | 51  | -16 | -23 | 1705 | 39  | -49 | -11 | 2705 | 39  | -4 | -2 |
| 706 | -18 | -16 | -23 | 1706 | 30  | -49 | -11 | 2706 | 33  | -4 | -2 |
| 707 | -27 | -16 | -23 | 1707 | 24  | -49 | -11 | 2707 | 27  | -4 | -2 |
| 708 | -33 | -16 | -23 | 1708 | 18  | -49 | -11 | 2708 | 9   | -4 | -2 |
| 709 | -42 | -16 | -23 | 1709 | 12  | -49 | -11 | 2709 | 3   | -4 | -2 |
| 710 | -54 | -16 | -23 | 1710 | 6   | -49 | -11 | 2710 | -3  | -4 | -2 |
| 711 | -60 | -16 | -23 | 1711 | 0   | -49 | -11 | 2711 | -9  | -4 | -2 |
| 712 | 42  | -13 | -23 | 1712 | -6  | -49 | -11 | 2712 | -33 | -4 | -2 |
| 713 | 36  | -13 | -23 | 1713 | -12 | -49 | -11 | 2713 | -39 | -4 | -2 |
| 714 | 30  | -13 | -23 | 1714 | -33 | -49 | -11 | 2714 | -45 | -4 | -2 |
| 715 | 24  | -13 | -23 | 1715 | -42 | -49 | -11 | 2715 | -51 | -4 | -2 |
| 716 | 18  | -13 | -23 | 1716 | -48 | -49 | -11 | 2716 | -57 | -4 | -2 |
| 717 | 12  | -13 | -23 | 1717 | -54 | -49 | -11 | 2717 | -24 | -1 | -2 |
| 718 | 60  | -10 | -23 | 1718 | -60 | -49 | -11 | 2718 | 57  | 2  | -2 |
| 719 | -27 | -10 | -23 | 1719 | 54  | -46 | -11 | 2719 | 51  | 2  | -2 |
| 720 | -33 | -10 | -23 | 1720 | 48  | -46 | -11 | 2720 | 45  | 2  | -2 |
| 721 | -54 | -10 | -23 | 1721 | -18 | -46 | -11 | 2721 | 39  | 2  | -2 |
| 722 | 36  | -7  | -23 | 1722 | -24 | -46 | -11 | 2722 | 33  | 2  | -2 |
| 723 | 30  | -7  | -23 | 1723 | 63  | -43 | -11 | 2723 | 24  | 2  | -2 |
| 724 | 24  | -7  | -23 | 1724 | 36  | -43 | -11 | 2724 | 15  | 2  | -2 |
| 725 | 18  | -7  | -23 | 1725 | 30  | -43 | -11 | 2725 | 6   | 2  | -2 |
| 726 | 12  | -7  | -23 | 1726 | 18  | -43 | -11 | 2726 | 0   | 2  | -2 |
| 727 | -18 | -7  | -23 | 1727 | 12  | -43 | -11 | 2727 | -9  | 2  | -2 |
| 728 | -36 | -4  | -23 | 1728 | 6   | -43 | -11 | 2728 | -15 | 2  | -2 |
| 729 | -54 | -4  | -23 | 1729 | 0   | -43 | -11 | 2729 | -51 | 2  | -2 |
| 730 | 57  | -1  | -23 | 1730 | -6  | -43 | -11 | 2730 | -24 | 5  | -2 |
| 731 | 48  | -1  | -23 | 1731 | -12 | -43 | -11 | 2731 | -30 | 5  | -2 |
| 732 | 18  | -1  | -23 | 1732 | -36 | -43 | -11 | 2732 | -36 | 5  | -2 |
| 733 | 12  | -1  | -23 | 1733 | -54 | -43 | -11 | 2733 | -42 | 5  | -2 |
| 734 | -18 | -1  | -23 | 1734 | -60 | -43 | -11 | 2734 | 57  | 8  | -2 |
| 735 | -45 | 2   | -23 | 1735 | 57  | -40 | -11 | 2735 | 51  | 8  | -2 |
| 736 | -51 | 2   | -23 | 1736 | 63  | -37 | -11 | 2736 | 45  | 8  | -2 |
| 737 | 54  | 5   | -23 | 1737 | 36  | -37 | -11 | 2737 | 39  | 8  | -2 |
| 738 | 48  | 5   | -23 | 1738 | 30  | -37 | -11 | 2738 | 30  | 8  | -2 |
| 739 | 42  | 5   | -23 | 1739 | 21  | -37 | -11 | 2739 | 24  | 8  | -2 |
| 740 | 33  | 5   | -23 | 1740 | 12  | -37 | -11 | 2740 | 18  | 8  | -2 |
| 741 | 27  | 5   | -23 | 1741 | 0   | -37 | -11 | 2741 | 12  | 8  | -2 |
| 742 | 21  | 5   | -23 | 1742 | -6  | -37 | -11 | 2742 | 6   | 8  | -2 |
| 743 | -24 | 5   | -23 | 1743 | -12 | -37 | -11 | 2743 | 0   | 8  | -2 |
| 744 | -36 | 5   | -23 | 1744 | -18 | -37 | -11 | 2744 | -6  | 8  | -2 |
| 745 | -12 | 8   | -23 | 1745 | -30 | -37 | -11 | 2745 | -15 | 8  | -2 |
| 746 | -45 | 8   | -23 | 1746 | -36 | -37 | -11 | 2746 | -24 | 11 | -2 |
| 747 | -51 | 8   | -23 | 1747 | -57 | -37 | -11 | 2747 | -30 | 11 | -2 |
| 748 | 33  | 11  | -23 | 1748 | -63 | -37 | -11 | 2748 | -36 | 11 | -2 |
| 749 | 27  | 11  | -23 | 1749 | 54  | -34 | -11 | 2749 | -42 | 11 | -2 |
| 750 | 21  | 11  | -23 | 1750 | 36  | -31 | -11 | 2750 | -48 | 11 | -2 |
| 751 | 15  | 11  | -23 | 1751 | 30  | -31 | -11 | 2751 | 51  | 14 | -2 |



|     |     |     |     |      |     |     |     |      |     |    |    |
|-----|-----|-----|-----|------|-----|-----|-----|------|-----|----|----|
| 752 | 9   | 11  | -23 | 1752 | 21  | -31 | -11 | 2752 | 42  | 14 | -2 |
| 753 | -6  | 11  | -23 | 1753 | 15  | -31 | -11 | 2753 | 36  | 14 | -2 |
| 754 | -21 | 11  | -23 | 1754 | 0   | -31 | -11 | 2754 | 30  | 14 | -2 |
| 755 | 3   | 14  | -23 | 1755 | -6  | -31 | -11 | 2755 | 24  | 14 | -2 |
| 756 | -15 | 14  | -23 | 1756 | -12 | -31 | -11 | 2756 | 18  | 14 | -2 |
| 757 | -27 | 14  | -23 | 1757 | -18 | -31 | -11 | 2757 | 12  | 14 | -2 |
| 758 | -33 | 14  | -23 | 1758 | -57 | -31 | -11 | 2758 | 6   | 14 | -2 |
| 759 | -39 | 14  | -23 | 1759 | -63 | -31 | -11 | 2759 | 0   | 14 | -2 |
| 760 | -45 | 14  | -23 | 1760 | 66  | -28 | -11 | 2760 | -6  | 14 | -2 |
| 761 | 45  | 17  | -23 | 1761 | 60  | -28 | -11 | 2761 | -12 | 14 | -2 |
| 762 | 39  | 17  | -23 | 1762 | 54  | -28 | -11 | 2762 | -24 | 17 | -2 |
| 763 | 33  | 17  | -23 | 1763 | -24 | -28 | -11 | 2763 | -30 | 17 | -2 |
| 764 | 18  | 17  | -23 | 1764 | -30 | -28 | -11 | 2764 | -36 | 17 | -2 |
| 765 | -3  | 17  | -23 | 1765 | 36  | -25 | -11 | 2765 | -42 | 17 | -2 |
| 766 | 12  | 20  | -23 | 1766 | 30  | -25 | -11 | 2766 | -48 | 17 | -2 |
| 767 | -12 | 20  | -23 | 1767 | 12  | -25 | -11 | 2767 | 51  | 20 | -2 |
| 768 | 12  | 26  | -23 | 1768 | 6   | -25 | -11 | 2768 | 42  | 20 | -2 |
| 769 | -9  | 26  | -23 | 1769 | -6  | -25 | -11 | 2769 | 36  | 20 | -2 |
| 770 | 12  | 32  | -23 | 1770 | -12 | -25 | -11 | 2770 | 30  | 20 | -2 |
| 771 | 6   | 32  | -23 | 1771 | -18 | -25 | -11 | 2771 | 24  | 20 | -2 |
| 772 | -12 | 32  | -23 | 1772 | -51 | -25 | -11 | 2772 | 18  | 20 | -2 |
| 773 | -3  | 35  | -23 | 1773 | -57 | -25 | -11 | 2773 | 12  | 20 | -2 |
| 774 | 12  | 38  | -23 | 1774 | -63 | -25 | -11 | 2774 | 6   | 20 | -2 |
| 775 | 6   | 38  | -23 | 1775 | 60  | -22 | -11 | 2775 | 0   | 20 | -2 |
| 776 | -3  | 41  | -23 | 1776 | 54  | -22 | -11 | 2776 | -6  | 20 | -2 |
| 777 | -9  | 41  | -23 | 1777 | 48  | -22 | -11 | 2777 | -12 | 20 | -2 |
| 778 | -3  | 47  | -23 | 1778 | 21  | -22 | -11 | 2778 | -18 | 23 | -2 |
| 779 | -9  | 47  | -23 | 1779 | -33 | -22 | -11 | 2779 | -30 | 23 | -2 |
| 780 | 9   | 50  | -23 | 1780 | 36  | -19 | -11 | 2780 | -36 | 23 | -2 |
| 781 | 3   | 53  | -23 | 1781 | 30  | -19 | -11 | 2781 | -42 | 23 | -2 |
| 782 | -3  | 53  | -23 | 1782 | 6   | -19 | -11 | 2782 | -48 | 23 | -2 |
| 783 | -15 | -94 | -20 | 1783 | -3  | -19 | -11 | 2783 | 51  | 26 | -2 |
| 784 | 21  | -91 | -20 | 1784 | -12 | -19 | -11 | 2784 | 42  | 26 | -2 |
| 785 | -6  | -91 | -20 | 1785 | -24 | -19 | -11 | 2785 | 36  | 26 | -2 |
| 786 | -24 | -91 | -20 | 1786 | -48 | -19 | -11 | 2786 | 30  | 26 | -2 |
| 787 | 27  | -88 | -20 | 1787 | -57 | -19 | -11 | 2787 | 12  | 26 | -2 |
| 788 | 15  | -88 | -20 | 1788 | 60  | -16 | -11 | 2788 | -30 | 29 | -2 |
| 789 | 9   | -88 | -20 | 1789 | 54  | -16 | -11 | 2789 | -39 | 29 | -2 |
| 790 | 3   | -88 | -20 | 1790 | 48  | -16 | -11 | 2790 | -48 | 29 | -2 |
| 791 | -15 | -88 | -20 | 1791 | 21  | -16 | -11 | 2791 | 51  | 32 | -2 |
| 792 | -30 | -88 | -20 | 1792 | 15  | -16 | -11 | 2792 | 42  | 32 | -2 |
| 793 | -6  | -85 | -20 | 1793 | -33 | -16 | -11 | 2793 | 36  | 32 | -2 |
| 794 | -24 | -85 | -20 | 1794 | 42  | -13 | -11 | 2794 | 0   | 32 | -2 |
| 795 | 27  | -82 | -20 | 1795 | 36  | -13 | -11 | 2795 | -6  | 32 | -2 |
| 796 | 18  | -82 | -20 | 1796 | 30  | -13 | -11 | 2796 | -45 | 35 | -2 |
| 797 | 9   | -82 | -20 | 1797 | 6   | -13 | -11 | 2797 | 48  | 38 | -2 |
| 798 | 3   | -82 | -20 | 1798 | -18 | -13 | -11 | 2798 | 9   | 38 | -2 |

|     |     |     |     |      |     |     |     |      |     |     |    |
|-----|-----|-----|-----|------|-----|-----|-----|------|-----|-----|----|
| 799 | -15 | -82 | -20 | 1799 | -24 | -13 | -11 | 2799 | 0   | 38  | -2 |
| 800 | -30 | -82 | -20 | 1800 | 60  | -10 | -11 | 2800 | -6  | 38  | -2 |
| 801 | 39  | -79 | -20 | 1801 | 54  | -10 | -11 | 2801 | -45 | 41  | -2 |
| 802 | -24 | -79 | -20 | 1802 | -33 | -10 | -11 | 2802 | 48  | 44  | -2 |
| 803 | 33  | -76 | -20 | 1803 | -51 | -10 | -11 | 2803 | 42  | 44  | -2 |
| 804 | 27  | -76 | -20 | 1804 | 48  | -7  | -11 | 2804 | 9   | 44  | -2 |
| 805 | 15  | -76 | -20 | 1805 | 42  | -7  | -11 | 2805 | 3   | 44  | -2 |
| 806 | 0   | -76 | -20 | 1806 | 36  | -7  | -11 | 2806 | -6  | 44  | -2 |
| 807 | -6  | -76 | -20 | 1807 | 30  | -7  | -11 | 2807 | -12 | 44  | -2 |
| 808 | -12 | -76 | -20 | 1808 | 24  | -7  | -11 | 2808 | -39 | 47  | -2 |
| 809 | -30 | -76 | -20 | 1809 | 18  | -7  | -11 | 2809 | 42  | 50  | -2 |
| 810 | -39 | -76 | -20 | 1810 | 12  | -7  | -11 | 2810 | 36  | 50  | -2 |
| 811 | 42  | -73 | -20 | 1811 | 6   | -7  | -11 | 2811 | 9   | 50  | -2 |
| 812 | 9   | -73 | -20 | 1812 | 0   | -7  | -11 | 2812 | 0   | 50  | -2 |
| 813 | -24 | -73 | -20 | 1813 | -6  | -7  | -11 | 2813 | -6  | 50  | -2 |
| 814 | 30  | -70 | -20 | 1814 | -12 | -7  | -11 | 2814 | -12 | 50  | -2 |
| 815 | 21  | -70 | -20 | 1815 | -18 | -7  | -11 | 2815 | -30 | 53  | -2 |
| 816 | 15  | -70 | -20 | 1816 | -24 | -7  | -11 | 2816 | -39 | 53  | -2 |
| 817 | 0   | -70 | -20 | 1817 | -39 | -7  | -11 | 2817 | 36  | 56  | -2 |
| 818 | -6  | -70 | -20 | 1818 | 60  | -4  | -11 | 2818 | 6   | 56  | -2 |
| 819 | -12 | -70 | -20 | 1819 | -33 | -4  | -11 | 2819 | 0   | 56  | -2 |
| 820 | -42 | -70 | -20 | 1820 | -51 | -4  | -11 | 2820 | -6  | 56  | -2 |
| 821 | 48  | -67 | -20 | 1821 | 54  | -1  | -11 | 2821 | -12 | 56  | -2 |
| 822 | 42  | -67 | -20 | 1822 | 48  | -1  | -11 | 2822 | 30  | 59  | -2 |
| 823 | 9   | -67 | -20 | 1823 | 42  | -1  | -11 | 2823 | -21 | 59  | -2 |
| 824 | -24 | -67 | -20 | 1824 | 36  | -1  | -11 | 2824 | -30 | 59  | -2 |
| 825 | -33 | -67 | -20 | 1825 | 18  | -1  | -11 | 2825 | 24  | 62  | -2 |
| 826 | 36  | -64 | -20 | 1826 | 12  | -1  | -11 | 2826 | 18  | 62  | -2 |
| 827 | 30  | -64 | -20 | 1827 | -6  | -1  | -11 | 2827 | 12  | 62  | -2 |
| 828 | 21  | -64 | -20 | 1828 | -12 | -1  | -11 | 2828 | 6   | 62  | -2 |
| 829 | 15  | -64 | -20 | 1829 | -21 | 2   | -11 | 2829 | 0   | 62  | -2 |
| 830 | 0   | -64 | -20 | 1830 | -27 | 2   | -11 | 2830 | -6  | 62  | -2 |
| 831 | -6  | -64 | -20 | 1831 | -33 | 2   | -11 | 2831 | -12 | 62  | -2 |
| 832 | -15 | -64 | -20 | 1832 | -39 | 2   | -11 | 2832 | -21 | 65  | -2 |
| 833 | -42 | -64 | -20 | 1833 | -45 | 2   | -11 | 2833 | 15  | -97 | 1  |
| 834 | -48 | -64 | -20 | 1834 | -51 | 2   | -11 | 2834 | -6  | -97 | 1  |
| 835 | 45  | -61 | -20 | 1835 | 54  | 5   | -11 | 2835 | -12 | -97 | 1  |
| 836 | 9   | -61 | -20 | 1836 | 48  | 5   | -11 | 2836 | 9   | -94 | 1  |
| 837 | -27 | -61 | -20 | 1837 | 42  | 5   | -11 | 2837 | 3   | -94 | 1  |
| 838 | -33 | -61 | -20 | 1838 | 36  | 5   | -11 | 2838 | -18 | -94 | 1  |
| 839 | 54  | -58 | -20 | 1839 | 27  | 5   | -11 | 2839 | -27 | -94 | 1  |
| 840 | 39  | -58 | -20 | 1840 | 21  | 5   | -11 | 2840 | 33  | -91 | 1  |
| 841 | 33  | -58 | -20 | 1841 | 9   | 5   | -11 | 2841 | 27  | -91 | 1  |
| 842 | 27  | -58 | -20 | 1842 | 3   | 5   | -11 | 2842 | -6  | -91 | 1  |
| 843 | 15  | -58 | -20 | 1843 | -3  | 5   | -11 | 2843 | -12 | -91 | 1  |
| 844 | 3   | -58 | -20 | 1844 | -12 | 5   | -11 | 2844 | -33 | -91 | 1  |
| 845 | -3  | -58 | -20 | 1845 | -21 | 8   | -11 | 2845 | 12  | -88 | 1  |

|     |     |     |     |      |     |    |     |      |     |     |   |
|-----|-----|-----|-----|------|-----|----|-----|------|-----|-----|---|
| 846 | -9  | -58 | -20 | 1846 | -27 | 8  | -11 | 2846 | 3   | -88 | 1 |
| 847 | -15 | -58 | -20 | 1847 | -33 | 8  | -11 | 2847 | -6  | -85 | 1 |
| 848 | -42 | -58 | -20 | 1848 | -39 | 8  | -11 | 2848 | -12 | -85 | 1 |
| 849 | -51 | -58 | -20 | 1849 | -45 | 8  | -11 | 2849 | -33 | -85 | 1 |
| 850 | 45  | -55 | -20 | 1850 | -51 | 8  | -11 | 2850 | -39 | -85 | 1 |
| 851 | -21 | -55 | -20 | 1851 | 33  | 11 | -11 | 2851 | 36  | -82 | 1 |
| 852 | -27 | -55 | -20 | 1852 | 27  | 11 | -11 | 2852 | 12  | -82 | 1 |
| 853 | -33 | -55 | -20 | 1853 | 21  | 11 | -11 | 2853 | 3   | -82 | 1 |
| 854 | 36  | -52 | -20 | 1854 | 15  | 11 | -11 | 2854 | -3  | -79 | 1 |
| 855 | 27  | -52 | -20 | 1855 | 9   | 11 | -11 | 2855 | -15 | -79 | 1 |
| 856 | 15  | -52 | -20 | 1856 | 3   | 11 | -11 | 2856 | 45  | -76 | 1 |
| 857 | 9   | -52 | -20 | 1857 | -3  | 11 | -11 | 2857 | 12  | -76 | 1 |
| 858 | 3   | -52 | -20 | 1858 | -12 | 11 | -11 | 2858 | 3   | -76 | 1 |
| 859 | -3  | -52 | -20 | 1859 | -21 | 14 | -11 | 2859 | -42 | -76 | 1 |
| 860 | -9  | -52 | -20 | 1860 | -27 | 14 | -11 | 2860 | -48 | -76 | 1 |
| 861 | -39 | -52 | -20 | 1861 | -33 | 14 | -11 | 2861 | -9  | -73 | 1 |
| 862 | -45 | -52 | -20 | 1862 | -39 | 14 | -11 | 2862 | -15 | -73 | 1 |
| 863 | -51 | -52 | -20 | 1863 | -45 | 14 | -11 | 2863 | 51  | -70 | 1 |
| 864 | 57  | -49 | -20 | 1864 | 45  | 17 | -11 | 2864 | 45  | -70 | 1 |
| 865 | 51  | -49 | -20 | 1865 | 39  | 17 | -11 | 2865 | -42 | -70 | 1 |
| 866 | 45  | -49 | -20 | 1866 | 33  | 17 | -11 | 2866 | -48 | -70 | 1 |
| 867 | -21 | -49 | -20 | 1867 | 27  | 17 | -11 | 2867 | 18  | -67 | 1 |
| 868 | -27 | -49 | -20 | 1868 | 21  | 17 | -11 | 2868 | 12  | -67 | 1 |
| 869 | 33  | -46 | -20 | 1869 | 15  | 17 | -11 | 2869 | 6   | -67 | 1 |
| 870 | 27  | -46 | -20 | 1870 | -3  | 17 | -11 | 2870 | 0   | -67 | 1 |
| 871 | 21  | -46 | -20 | 1871 | -12 | 17 | -11 | 2871 | -6  | -67 | 1 |
| 872 | 15  | -46 | -20 | 1872 | -27 | 20 | -11 | 2872 | -18 | -67 | 1 |
| 873 | 9   | -46 | -20 | 1873 | -33 | 20 | -11 | 2873 | -24 | -67 | 1 |
| 874 | 3   | -46 | -20 | 1874 | -39 | 20 | -11 | 2874 | -42 | -64 | 1 |
| 875 | -3  | -46 | -20 | 1875 | -45 | 20 | -11 | 2875 | -48 | -64 | 1 |
| 876 | -9  | -46 | -20 | 1876 | 45  | 23 | -11 | 2876 | 51  | -61 | 1 |
| 877 | -39 | -46 | -20 | 1877 | 39  | 23 | -11 | 2877 | 45  | -61 | 1 |
| 878 | -45 | -46 | -20 | 1878 | 33  | 23 | -11 | 2878 | 18  | -61 | 1 |
| 879 | -51 | -46 | -20 | 1879 | 27  | 23 | -11 | 2879 | 12  | -61 | 1 |
| 880 | -57 | -46 | -20 | 1880 | -3  | 23 | -11 | 2880 | 6   | -61 | 1 |
| 881 | 60  | -43 | -20 | 1881 | -9  | 23 | -11 | 2881 | 0   | -61 | 1 |
| 882 | 51  | -43 | -20 | 1882 | -30 | 26 | -11 | 2882 | -6  | -61 | 1 |
| 883 | 45  | -43 | -20 | 1883 | -45 | 26 | -11 | 2883 | -12 | -61 | 1 |
| 884 | -21 | -43 | -20 | 1884 | 45  | 29 | -11 | 2884 | -18 | -61 | 1 |
| 885 | -27 | -43 | -20 | 1885 | 39  | 29 | -11 | 2885 | -57 | -61 | 1 |
| 886 | 39  | -40 | -20 | 1886 | 33  | 29 | -11 | 2886 | 57  | -58 | 1 |
| 887 | 30  | -40 | -20 | 1887 | 27  | 29 | -11 | 2887 | 27  | -58 | 1 |
| 888 | 24  | -40 | -20 | 1888 | 3   | 29 | -11 | 2888 | -24 | -58 | 1 |
| 889 | -3  | -40 | -20 | 1889 | -3  | 29 | -11 | 2889 | 51  | -55 | 1 |
| 890 | -9  | -40 | -20 | 1890 | -9  | 29 | -11 | 2890 | 45  | -55 | 1 |
| 891 | -15 | -40 | -20 | 1891 | -24 | 32 | -11 | 2891 | 18  | -55 | 1 |
| 892 | -33 | -40 | -20 | 1892 | -30 | 32 | -11 | 2892 | 12  | -55 | 1 |

|     |     |     |     |      |     |      |     |      |     |     |   |
|-----|-----|-----|-----|------|-----|------|-----|------|-----|-----|---|
| 893 | -39 | -40 | -20 | 1893 | -36 | 32   | -11 | 2893 | 6   | -55 | 1 |
| 894 | -45 | -40 | -20 | 1894 | -42 | 32   | -11 | 2894 | 0   | -55 | 1 |
| 895 | -51 | -40 | -20 | 1895 | 45  | 35   | -11 | 2895 | -6  | -55 | 1 |
| 896 | 51  | -37 | -20 | 1896 | 39  | 35   | -11 | 2896 | -12 | -55 | 1 |
| 897 | 45  | -37 | -20 | 1897 | 24  | 35   | -11 | 2897 | 57  | -52 | 1 |
| 898 | 15  | -37 | -20 | 1898 | 3   | 35   | -11 | 2898 | -18 | -52 | 1 |
| 899 | 9   | -37 | -20 | 1899 | -3  | 35   | -11 | 2899 | -24 | -52 | 1 |
| 900 | -24 | -37 | -20 | 1900 | -9  | 35   | -11 | 2900 | -51 | -52 | 1 |
| 901 | 39  | -34 | -20 | 1901 | -24 | 38   | -11 | 2901 | -57 | -52 | 1 |
| 902 | 3   | -34 | -20 | 1902 | -30 | 38   | -11 | 2902 | 51  | -49 | 1 |
| 903 | -3  | -34 | -20 | 1903 | -36 | 38   | -11 | 2903 | 24  | -49 | 1 |
| 904 | -9  | -34 | -20 | 1904 | -42 | 38   | -11 | 2904 | 18  | -49 | 1 |
| 905 | -15 | -34 | -20 | 1905 | 45  | 41   | -11 | 2905 | 12  | -49 | 1 |
| 906 | -33 | -34 | -20 | 1906 | 39  | 41   | -11 | 2906 | 6   | -49 | 1 |
| 907 | -42 | -34 | -20 | 1907 | -3  | 41   | -11 | 2907 | -6  | -49 | 1 |
| 908 | -48 | -34 | -20 | 1908 | -9  | 41   | -11 | 2908 | -12 | -49 | 1 |
| 909 | -54 | -34 | -20 | 1909 | 33  | 44   | -11 | 2909 | 63  | -46 | 1 |
| 910 | -60 | -34 | -20 | 1910 | -24 | 44   | -11 | 2910 | 57  | -46 | 1 |
| 911 | 63  | -31 | -20 | 1911 | -30 | 44   | -11 | 2911 | -18 | -46 | 1 |
| 912 | 57  | -31 | -20 | 1912 | -36 | 44   | -11 | 2912 | -24 | -46 | 1 |
| 913 | 51  | -31 | -20 | 1913 | -42 | 44   | -11 | 2913 | -51 | -46 | 1 |
| 914 | 30  | -31 | -20 | 1914 | 42  | 47   | -11 | 2914 | -57 | -46 | 1 |
| 915 | 24  | -31 | -20 | 1915 | 6   | 47   | -11 | 2915 | -63 | -46 | 1 |
| 916 | 18  | -31 | -20 | 1916 | -3  | 47   | -11 | 2916 | 51  | -43 | 1 |
| 917 | 9   | -31 | -20 | 1917 | -9  | 47   | -11 | 2917 | 24  | -43 | 1 |
| 918 | -27 | -31 | -20 | 1918 | 36  | 50   | -11 | 2918 | 18  | -43 | 1 |
| 919 | 39  | -28 | -20 | 1919 | 30  | 50   | -11 | 2919 | 12  | -43 | 1 |
| 920 | 3   | -28 | -20 | 1920 | 24  | 50   | -11 | 2920 | -12 | -43 | 1 |
| 921 | -3  | -28 | -20 | 1921 | -24 | 50   | -11 | 2921 | 66  | -40 | 1 |
| 922 | -9  | -28 | -20 | 1922 | -30 | 50   | -11 | 2922 | 60  | -40 | 1 |
| 923 | -15 | -28 | -20 | 1923 | -36 | 50   | -11 | 2923 | -48 | -40 | 1 |
| 924 | -36 | -28 | -20 | 1924 | 3   | 53   | -11 | 2924 | -54 | -40 | 1 |
| 925 | -42 | -28 | -20 | 1925 | -3  | 53   | -11 | 2925 | -60 | -40 | 1 |
| 926 | -48 | -28 | -20 | 1926 | -9  | 53   | -11 | 2926 | 30  | -37 | 1 |
| 927 | -54 | -28 | -20 | 1927 | 33  | 56   | -11 | 2927 | 24  | -37 | 1 |
| 928 | -60 | -28 | -20 | 1928 | 27  | 56   | -11 | 2928 | 18  | -37 | 1 |
| 929 | 63  | -25 | -20 | 1929 | -21 | 56   | -11 | 2929 | 12  | -37 | 1 |
| 930 | 57  | -25 | -20 | 1930 | -27 | 56   | -11 | 2930 | -12 | -37 | 1 |
| 931 | 51  | -25 | -20 | 1931 | 21  | 59   | -11 | 2931 | -18 | -37 | 1 |
| 932 | 45  | -25 | -20 | 1932 | 9   | 59   | -11 | 2932 | -30 | -37 | 1 |
| 933 | 30  | -25 | -20 | 1933 | 3   | 59   | -11 | 2933 | 66  | -34 | 1 |
| 934 | 24  | -25 | -20 | 1934 | -3  | 59   | -11 | 2934 | 60  | -34 | 1 |
| 935 | 18  | -25 | -20 | 1935 | -9  | 59   | -11 | 2935 | 54  | -34 | 1 |
| 936 | 9   | -25 | -20 | 1936 | -15 | 59   | -11 | 2936 | 48  | -34 | 1 |
| 937 | -27 | -25 | -20 | 1937 | -12 | -100 | -8  | 2937 | -48 | -34 | 1 |
| 938 | 39  | -22 | -20 | 1938 | -18 | -100 | -8  | 2938 | 24  | -31 | 1 |
| 939 | 0   | -22 | -20 | 1939 | 21  | -97  | -8  | 2939 | 15  | -31 | 1 |

|     |     |     |     |      |     |     |    |      |     |     |   |
|-----|-----|-----|-----|------|-----|-----|----|------|-----|-----|---|
| 940 | -9  | -22 | -20 | 1940 | 15  | -97 | -8 | 2940 | 6   | -31 | 1 |
| 941 | -15 | -22 | -20 | 1941 | -24 | -97 | -8 | 2941 | -6  | -31 | 1 |
| 942 | -21 | -22 | -20 | 1942 | 27  | -94 | -8 | 2942 | -12 | -31 | 1 |
| 943 | 57  | -19 | -20 | 1943 | -3  | -94 | -8 | 2943 | -18 | -31 | 1 |
| 944 | 9   | -19 | -20 | 1944 | -9  | -94 | -8 | 2944 | -57 | -31 | 1 |
| 945 | -30 | -19 | -20 | 1945 | 33  | -91 | -8 | 2945 | -63 | -31 | 1 |
| 946 | -39 | -19 | -20 | 1946 | 21  | -91 | -8 | 2946 | 60  | -28 | 1 |
| 947 | -57 | -19 | -20 | 1947 | 15  | -91 | -8 | 2947 | 54  | -28 | 1 |
| 948 | 39  | -16 | -20 | 1948 | 6   | -91 | -8 | 2948 | 48  | -28 | 1 |
| 949 | 33  | -16 | -20 | 1949 | -18 | -91 | -8 | 2949 | 15  | -25 | 1 |
| 950 | 27  | -16 | -20 | 1950 | -24 | -91 | -8 | 2950 | 6   | -25 | 1 |
| 951 | 21  | -16 | -20 | 1951 | -3  | -88 | -8 | 2951 | 0   | -25 | 1 |
| 952 | 15  | -16 | -20 | 1952 | -9  | -88 | -8 | 2952 | -6  | -25 | 1 |
| 953 | 63  | -13 | -20 | 1953 | 39  | -85 | -8 | 2953 | -12 | -25 | 1 |
| 954 | 57  | -13 | -20 | 1954 | 30  | -85 | -8 | 2954 | -18 | -25 | 1 |
| 955 | -12 | -13 | -20 | 1955 | 24  | -85 | -8 | 2955 | -48 | -25 | 1 |
| 956 | -21 | -13 | -20 | 1956 | 12  | -85 | -8 | 2956 | -54 | -25 | 1 |
| 957 | -30 | -13 | -20 | 1957 | 6   | -85 | -8 | 2957 | -63 | -25 | 1 |
| 958 | -36 | -13 | -20 | 1958 | -18 | -85 | -8 | 2958 | 66  | -22 | 1 |
| 959 | -51 | -13 | -20 | 1959 | -24 | -85 | -8 | 2959 | 60  | -22 | 1 |
| 960 | -57 | -13 | -20 | 1960 | -39 | -85 | -8 | 2960 | 54  | -22 | 1 |
| 961 | 51  | -10 | -20 | 1961 | -9  | -82 | -8 | 2961 | 48  | -22 | 1 |
| 962 | 33  | -10 | -20 | 1962 | 42  | -79 | -8 | 2962 | 42  | -22 | 1 |
| 963 | 27  | -10 | -20 | 1963 | 36  | -79 | -8 | 2963 | -33 | -22 | 1 |
| 964 | 21  | -10 | -20 | 1964 | 30  | -79 | -8 | 2964 | 15  | -19 | 1 |
| 965 | 15  | -10 | -20 | 1965 | -24 | -79 | -8 | 2965 | 6   | -19 | 1 |
| 966 | 57  | -7  | -20 | 1966 | -39 | -79 | -8 | 2966 | 0   | -19 | 1 |
| 967 | -12 | -7  | -20 | 1967 | 21  | -76 | -8 | 2967 | -6  | -19 | 1 |
| 968 | -24 | -7  | -20 | 1968 | 15  | -76 | -8 | 2968 | -12 | -19 | 1 |
| 969 | -30 | -7  | -20 | 1969 | 9   | -76 | -8 | 2969 | -42 | -19 | 1 |
| 970 | -48 | -7  | -20 | 1970 | 3   | -76 | -8 | 2970 | -48 | -19 | 1 |
| 971 | -57 | -7  | -20 | 1971 | -6  | -76 | -8 | 2971 | -54 | -19 | 1 |
| 972 | 51  | -4  | -20 | 1972 | -12 | -76 | -8 | 2972 | 60  | -16 | 1 |
| 973 | 33  | -4  | -20 | 1973 | -30 | -76 | -8 | 2973 | 54  | -16 | 1 |
| 974 | 27  | -4  | -20 | 1974 | 30  | -73 | -8 | 2974 | 48  | -16 | 1 |
| 975 | 21  | -4  | -20 | 1975 | -21 | -73 | -8 | 2975 | 42  | -16 | 1 |
| 976 | 15  | -4  | -20 | 1976 | -39 | -73 | -8 | 2976 | 36  | -13 | 1 |
| 977 | -42 | -4  | -20 | 1977 | -48 | -73 | -8 | 2977 | 30  | -13 | 1 |
| 978 | 42  | -1  | -20 | 1978 | 48  | -70 | -8 | 2978 | 12  | -13 | 1 |
| 979 | -24 | -1  | -20 | 1979 | 42  | -70 | -8 | 2979 | 6   | -13 | 1 |
| 980 | -30 | -1  | -20 | 1980 | 21  | -70 | -8 | 2980 | 0   | -13 | 1 |
| 981 | -48 | -1  | -20 | 1981 | 15  | -70 | -8 | 2981 | -6  | -13 | 1 |
| 982 | 51  | 2   | -20 | 1982 | 9   | -70 | -8 | 2982 | -12 | -13 | 1 |
| 983 | 36  | 2   | -20 | 1983 | 3   | -70 | -8 | 2983 | -27 | -13 | 1 |
| 984 | 30  | 2   | -20 | 1984 | -6  | -70 | -8 | 2984 | -36 | -13 | 1 |
| 985 | 24  | 2   | -20 | 1985 | -12 | -70 | -8 | 2985 | -42 | -13 | 1 |
| 986 | 15  | 2   | -20 | 1986 | -24 | -67 | -8 | 2986 | -48 | -13 | 1 |

|      |     |   |     |      |     |     |    |      |     |     |   |
|------|-----|---|-----|------|-----|-----|----|------|-----|-----|---|
| 987  | -15 | 2 | -20 | 1987 | 42  | -64 | -8 | 2987 | -54 | -13 | 1 |
| 988  | -39 | 2 | -20 | 1988 | 30  | -64 | -8 | 2988 | 60  | -10 | 1 |
| 989  | -30 | 5 | -20 | 1989 | 21  | -64 | -8 | 2989 | 54  | -10 | 1 |
| 990  | -48 | 5 | -20 | 1990 | 15  | -64 | -8 | 2990 | 48  | -10 | 1 |
| 991  | 51  | 8 | -20 | 1991 | 9   | -64 | -8 | 2991 | 42  | -7  | 1 |
| 992  | 45  | 8 | -20 | 1992 | 3   | -64 | -8 | 2992 | 36  | -7  | 1 |
| 993  | 39  | 8 | -20 | 1993 | -6  | -64 | -8 | 2993 | 30  | -7  | 1 |
| 994  | 30  | 8 | -20 | 1994 | -15 | -64 | -8 | 2994 | 6   | -7  | 1 |
| 995  | 24  | 8 | -20 | 1995 | -36 | -64 | -8 | 2995 | 0   | -7  | 1 |
| 996  | 18  | 8 | -20 | 1996 | -42 | -64 | -8 | 2996 | -6  | -7  | 1 |
| 997  | 12  | 8 | -20 | 1997 | -48 | -64 | -8 | 2997 | -27 | -7  | 1 |
| 998  | 6   | 8 | -20 | 1998 | -54 | -64 | -8 | 2998 | -36 | -7  | 1 |
| 999  | -18 | 8 | -20 | 1999 | 54  | -61 | -8 | 2999 | -42 | -7  | 1 |
| 1000 | -39 | 8 | -20 | 2000 | -27 | -61 | -8 | 3000 | -48 | -7  | 1 |

| ROI  | x   | y  | z | ROI  | x   | y   | z  | ROI  | x   | y   | z  |
|------|-----|----|---|------|-----|-----|----|------|-----|-----|----|
| 3001 | -54 | -7 | 1 | 4001 | -45 | -40 | 13 | 5001 | 6   | -55 | 28 |
| 3002 | 60  | -4 | 1 | 4002 | -54 | -40 | 13 | 5002 | 0   | -55 | 28 |
| 3003 | 54  | -1 | 1 | 4003 | -60 | -40 | 13 | 5003 | 48  | -52 | 28 |
| 3004 | 48  | -1 | 1 | 4004 | 51  | -37 | 13 | 5004 | -9  | -52 | 28 |
| 3005 | 42  | -1 | 1 | 4005 | 45  | -37 | 13 | 5005 | -48 | -52 | 28 |
| 3006 | 36  | -1 | 1 | 4006 | 66  | -34 | 13 | 5006 | 60  | -49 | 28 |
| 3007 | 30  | -1 | 1 | 4007 | 60  | -34 | 13 | 5007 | 12  | -49 | 28 |
| 3008 | -6  | -1 | 1 | 4008 | -39 | -34 | 13 | 5008 | 6   | -49 | 28 |
| 3009 | -30 | -1 | 1 | 4009 | -45 | -34 | 13 | 5009 | 0   | -49 | 28 |
| 3010 | -36 | -1 | 1 | 4010 | -54 | -34 | 13 | 5010 | -57 | -49 | 28 |
| 3011 | -42 | -1 | 1 | 4011 | -60 | -34 | 13 | 5011 | 48  | -46 | 28 |
| 3012 | -48 | -1 | 1 | 4012 | 51  | -31 | 13 | 5012 | -9  | -46 | 28 |
| 3013 | -54 | -1 | 1 | 4013 | 45  | -31 | 13 | 5013 | 60  | -43 | 28 |
| 3014 | -21 | 2  | 1 | 4014 | 18  | -31 | 13 | 5014 | 6   | -43 | 28 |
| 3015 | 54  | 5  | 1 | 4015 | -12 | -31 | 13 | 5015 | 0   | -43 | 28 |
| 3016 | 48  | 5  | 1 | 4016 | -18 | -31 | 13 | 5016 | -51 | -43 | 28 |
| 3017 | 42  | 5  | 1 | 4017 | 66  | -28 | 13 | 5017 | -57 | -43 | 28 |
| 3018 | 36  | 5  | 1 | 4018 | 60  | -28 | 13 | 5018 | 54  | -40 | 28 |
| 3019 | 27  | 5  | 1 | 4019 | 12  | -28 | 13 | 5019 | 63  | -37 | 28 |
| 3020 | 21  | 5  | 1 | 4020 | -33 | -28 | 13 | 5020 | 6   | -37 | 28 |
| 3021 | 9   | 5  | 1 | 4021 | -39 | -28 | 13 | 5021 | 0   | -37 | 28 |
| 3022 | 3   | 5  | 1 | 4022 | -45 | -28 | 13 | 5022 | -6  | -37 | 28 |
| 3023 | -3  | 5  | 1 | 4023 | -51 | -28 | 13 | 5023 | -48 | -37 | 28 |
| 3024 | -48 | 5  | 1 | 4024 | -60 | -28 | 13 | 5024 | -57 | -37 | 28 |
| 3025 | -54 | 5  | 1 | 4025 | 45  | -25 | 13 | 5025 | 54  | -34 | 28 |
| 3026 | -21 | 8  | 1 | 4026 | -6  | -25 | 13 | 5026 | 6   | -31 | 28 |
| 3027 | -27 | 8  | 1 | 4027 | -12 | -25 | 13 | 5027 | 0   | -31 | 28 |
| 3028 | -33 | 8  | 1 | 4028 | -18 | -25 | 13 | 5028 | -6  | -31 | 28 |
| 3029 | -39 | 8  | 1 | 4029 | 60  | -22 | 13 | 5029 | -54 | -31 | 28 |
| 3030 | 54  | 11 | 1 | 4030 | 54  | -22 | 13 | 5030 | 63  | -28 | 28 |
| 3031 | 48  | 11 | 1 | 4031 | 12  | -22 | 13 | 5031 | 57  | -28 | 28 |

|      |     |    |   |      |     |     |    |      |     |     |    |
|------|-----|----|---|------|-----|-----|----|------|-----|-----|----|
| 3032 | 33  | 11 | 1 | 4032 | -33 | -22 | 13 | 5032 | 48  | -28 | 28 |
| 3033 | 27  | 11 | 1 | 4033 | -39 | -22 | 13 | 5033 | 6   | -25 | 28 |
| 3034 | 21  | 11 | 1 | 4034 | -45 | -22 | 13 | 5034 | 0   | -25 | 28 |
| 3035 | 15  | 11 | 1 | 4035 | -60 | -22 | 13 | 5035 | -54 | -25 | 28 |
| 3036 | 9   | 11 | 1 | 4036 | 6   | -19 | 13 | 5036 | -60 | -25 | 28 |
| 3037 | 3   | 11 | 1 | 4037 | 0   | -19 | 13 | 5037 | 63  | -22 | 28 |
| 3038 | -3  | 11 | 1 | 4038 | -6  | -19 | 13 | 5038 | 57  | -22 | 28 |
| 3039 | -9  | 11 | 1 | 4039 | -12 | -19 | 13 | 5039 | 3   | -19 | 28 |
| 3040 | -18 | 14 | 1 | 4040 | -18 | -19 | 13 | 5040 | -3  | -19 | 28 |
| 3041 | -27 | 14 | 1 | 4041 | -54 | -19 | 13 | 5041 | -54 | -19 | 28 |
| 3042 | -33 | 14 | 1 | 4042 | 60  | -16 | 13 | 5042 | -60 | -19 | 28 |
| 3043 | -39 | 14 | 1 | 4043 | 54  | -16 | 13 | 5043 | 63  | -16 | 28 |
| 3044 | -45 | 14 | 1 | 4044 | 48  | -16 | 13 | 5044 | 54  | -16 | 28 |
| 3045 | -51 | 14 | 1 | 4045 | 42  | -16 | 13 | 5045 | 3   | -13 | 28 |
| 3046 | 54  | 17 | 1 | 4046 | 36  | -16 | 13 | 5046 | -54 | -13 | 28 |
| 3047 | 48  | 17 | 1 | 4047 | 18  | -16 | 13 | 5047 | -60 | -13 | 28 |
| 3048 | 39  | 17 | 1 | 4048 | -33 | -16 | 13 | 5048 | 60  | -10 | 28 |
| 3049 | 33  | 17 | 1 | 4049 | -39 | -16 | 13 | 5049 | 54  | -10 | 28 |
| 3050 | 27  | 17 | 1 | 4050 | -45 | -16 | 13 | 5050 | -51 | -7  | 28 |
| 3051 | 21  | 17 | 1 | 4051 | 6   | -13 | 13 | 5051 | -57 | -4  | 28 |
| 3052 | 15  | 17 | 1 | 4052 | 0   | -13 | 13 | 5052 | 57  | -1  | 28 |
| 3053 | 9   | 17 | 1 | 4053 | -6  | -13 | 13 | 5053 | 51  | -1  | 28 |
| 3054 | 3   | 17 | 1 | 4054 | -12 | -13 | 13 | 5054 | 0   | -1  | 28 |
| 3055 | -3  | 17 | 1 | 4055 | -54 | -13 | 13 | 5055 | -42 | 2   | 28 |
| 3056 | -9  | 17 | 1 | 4056 | -60 | -13 | 13 | 5056 | -48 | 2   | 28 |
| 3057 | -21 | 20 | 1 | 4057 | 60  | -10 | 13 | 5057 | -54 | 2   | 28 |
| 3058 | -27 | 20 | 1 | 4058 | 54  | -10 | 13 | 5058 | 51  | 5   | 28 |
| 3059 | -33 | 20 | 1 | 4059 | 48  | -10 | 13 | 5059 | 45  | 5   | 28 |
| 3060 | -39 | 20 | 1 | 4060 | 15  | -10 | 13 | 5060 | 3   | 5   | 28 |
| 3061 | -45 | 20 | 1 | 4061 | -39 | -10 | 13 | 5061 | -3  | 5   | 28 |
| 3062 | 48  | 23 | 1 | 4062 | -45 | -10 | 13 | 5062 | -36 | 8   | 28 |
| 3063 | 39  | 23 | 1 | 4063 | 42  | -7  | 13 | 5063 | -42 | 8   | 28 |
| 3064 | 33  | 23 | 1 | 4064 | 36  | -7  | 13 | 5064 | -48 | 8   | 28 |
| 3065 | 27  | 23 | 1 | 4065 | 30  | -7  | 13 | 5065 | 54  | 11  | 28 |
| 3066 | 21  | 23 | 1 | 4066 | 6   | -7  | 13 | 5066 | 42  | 11  | 28 |
| 3067 | 15  | 23 | 1 | 4067 | 0   | -7  | 13 | 5067 | 6   | 14  | 28 |
| 3068 | 9   | 23 | 1 | 4068 | -6  | -7  | 13 | 5068 | 0   | 14  | 28 |
| 3069 | -27 | 26 | 1 | 4069 | -12 | -7  | 13 | 5069 | -6  | 14  | 28 |
| 3070 | -33 | 26 | 1 | 4070 | -54 | -7  | 13 | 5070 | -36 | 14  | 28 |
| 3071 | -45 | 26 | 1 | 4071 | -60 | -7  | 13 | 5071 | -42 | 14  | 28 |
| 3072 | 48  | 29 | 1 | 4072 | 60  | -4  | 13 | 5072 | -51 | 14  | 28 |
| 3073 | 39  | 29 | 1 | 4073 | 54  | -4  | 13 | 5073 | 54  | 17  | 28 |
| 3074 | 33  | 29 | 1 | 4074 | 48  | -1  | 13 | 5074 | 42  | 17  | 28 |
| 3075 | -33 | 32 | 1 | 4075 | 42  | -1  | 13 | 5075 | 9   | 20  | 28 |
| 3076 | -42 | 32 | 1 | 4076 | 36  | -1  | 13 | 5076 | -6  | 20  | 28 |
| 3077 | 45  | 35 | 1 | 4077 | 30  | -1  | 13 | 5077 | -39 | 20  | 28 |
| 3078 | 6   | 35 | 1 | 4078 | 12  | -1  | 13 | 5078 | -45 | 20  | 28 |

|      |     |      |   |      |     |    |    |      |     |    |    |
|------|-----|------|---|------|-----|----|----|------|-----|----|----|
| 3079 | -3  | 35   | 1 | 4079 | 6   | -1 | 13 | 5079 | -51 | 20 | 28 |
| 3080 | -48 | 38   | 1 | 4080 | 0   | -1 | 13 | 5080 | -12 | 23 | 28 |
| 3081 | 45  | 41   | 1 | 4081 | -6  | -1 | 13 | 5081 | 51  | 26 | 28 |
| 3082 | 12  | 41   | 1 | 4082 | -12 | -1 | 13 | 5082 | 45  | 26 | 28 |
| 3083 | 6   | 41   | 1 | 4083 | -30 | -1 | 13 | 5083 | 39  | 26 | 28 |
| 3084 | -3  | 41   | 1 | 4084 | -36 | -1 | 13 | 5084 | -45 | 26 | 28 |
| 3085 | -9  | 41   | 1 | 4085 | -42 | -1 | 13 | 5085 | 12  | 29 | 28 |
| 3086 | -42 | 44   | 1 | 4086 | -48 | -1 | 13 | 5086 | 6   | 29 | 28 |
| 3087 | 45  | 47   | 1 | 4087 | -54 | -1 | 13 | 5087 | 0   | 29 | 28 |
| 3088 | 39  | 47   | 1 | 4088 | 54  | 5  | 13 | 5088 | -6  | 29 | 28 |
| 3089 | 12  | 47   | 1 | 4089 | 48  | 5  | 13 | 5089 | -12 | 29 | 28 |
| 3090 | 6   | 47   | 1 | 4090 | 42  | 5  | 13 | 5090 | 45  | 32 | 28 |
| 3091 | -3  | 47   | 1 | 4091 | 36  | 5  | 13 | 5091 | 39  | 32 | 28 |
| 3092 | -9  | 47   | 1 | 4092 | 27  | 5  | 13 | 5092 | 33  | 32 | 28 |
| 3093 | -33 | 50   | 1 | 4093 | 15  | 5  | 13 | 5093 | -30 | 32 | 28 |
| 3094 | -42 | 50   | 1 | 4094 | -12 | 5  | 13 | 5094 | -36 | 32 | 28 |
| 3095 | 39  | 53   | 1 | 4095 | -30 | 5  | 13 | 5095 | -42 | 32 | 28 |
| 3096 | 33  | 53   | 1 | 4096 | -36 | 5  | 13 | 5096 | 27  | 35 | 28 |
| 3097 | 27  | 53   | 1 | 4097 | -42 | 5  | 13 | 5097 | 45  | 38 | 28 |
| 3098 | 12  | 53   | 1 | 4098 | -48 | 5  | 13 | 5098 | 39  | 38 | 28 |
| 3099 | 3   | 53   | 1 | 4099 | -54 | 5  | 13 | 5099 | 9   | 38 | 28 |
| 3100 | -3  | 53   | 1 | 4100 | -18 | 8  | 13 | 5100 | 3   | 38 | 28 |
| 3101 | -9  | 53   | 1 | 4101 | 54  | 11 | 13 | 5101 | -3  | 38 | 28 |
| 3102 | -24 | 56   | 1 | 4102 | 48  | 11 | 13 | 5102 | -9  | 38 | 28 |
| 3103 | -33 | 56   | 1 | 4103 | 42  | 11 | 13 | 5103 | -24 | 38 | 28 |
| 3104 | 21  | 59   | 1 | 4104 | 36  | 11 | 13 | 5104 | -30 | 38 | 28 |
| 3105 | 9   | 59   | 1 | 4105 | -30 | 11 | 13 | 5105 | -36 | 38 | 28 |
| 3106 | 3   | 59   | 1 | 4106 | -36 | 11 | 13 | 5106 | -42 | 38 | 28 |
| 3107 | -3  | 59   | 1 | 4107 | -48 | 11 | 13 | 5107 | 33  | 41 | 28 |
| 3108 | -9  | 59   | 1 | 4108 | -54 | 11 | 13 | 5108 | 27  | 41 | 28 |
| 3109 | -18 | 62   | 1 | 4109 | 18  | 14 | 13 | 5109 | 9   | 44 | 28 |
| 3110 | -24 | 62   | 1 | 4110 | 12  | 14 | 13 | 5110 | 3   | 44 | 28 |
| 3111 | 21  | 65   | 1 | 4111 | -12 | 14 | 13 | 5111 | -3  | 44 | 28 |
| 3112 | 15  | 65   | 1 | 4112 | -18 | 14 | 13 | 5112 | -9  | 44 | 28 |
| 3113 | 9   | 65   | 1 | 4113 | 54  | 17 | 13 | 5113 | -21 | 44 | 28 |
| 3114 | -9  | 65   | 1 | 4114 | 48  | 17 | 13 | 5114 | -30 | 44 | 28 |
| 3115 | -9  | -100 | 4 | 4115 | 36  | 17 | 13 | 5115 | -36 | 44 | 28 |
| 3116 | -15 | -100 | 4 | 4116 | -36 | 17 | 13 | 5116 | 33  | 47 | 28 |
| 3117 | 21  | -97  | 4 | 4117 | -48 | 17 | 13 | 5117 | 27  | 47 | 28 |
| 3118 | -21 | -97  | 4 | 4118 | -54 | 17 | 13 | 5118 | 21  | 47 | 28 |
| 3119 | -3  | -94  | 4 | 4119 | 54  | 23 | 13 | 5119 | 9   | 50 | 28 |
| 3120 | -9  | -94  | 4 | 4120 | 48  | 23 | 13 | 5120 | -18 | 50 | 28 |
| 3121 | 18  | -91  | 4 | 4121 | -45 | 26 | 13 | 5121 | -24 | 50 | 28 |
| 3122 | 6   | -91  | 4 | 4122 | -51 | 26 | 13 | 5122 | -30 | 50 | 28 |
| 3123 | 36  | -88  | 4 | 4123 | 54  | 29 | 13 | 5123 | 27  | 53 | 28 |
| 3124 | 30  | -88  | 4 | 4124 | 48  | 29 | 13 | 5124 | 21  | 53 | 28 |
| 3125 | -3  | -88  | 4 | 4125 | 0   | 29 | 13 | 5125 | 3   | 53 | 28 |



|      |     |     |   |      |     |     |    |      |     |     |    |
|------|-----|-----|---|------|-----|-----|----|------|-----|-----|----|
| 3126 | -9  | -88 | 4 | 4126 | 42  | 32  | 13 | 5126 | -3  | 53  | 28 |
| 3127 | -30 | -88 | 4 | 4127 | -42 | 32  | 13 | 5127 | -9  | 53  | 28 |
| 3128 | -36 | -88 | 4 | 4128 | 6   | 35  | 13 | 5128 | 12  | 56  | 28 |
| 3129 | 15  | -85 | 4 | 4129 | 0   | 35  | 13 | 5129 | -18 | 56  | 28 |
| 3130 | 9   | -85 | 4 | 4130 | -6  | 35  | 13 | 5130 | -24 | 56  | 28 |
| 3131 | 42  | -82 | 4 | 4131 | -12 | 38  | 13 | 5131 | 15  | -88 | 31 |
| 3132 | -9  | -82 | 4 | 4132 | -39 | 38  | 13 | 5132 | -12 | -88 | 31 |
| 3133 | -36 | -82 | 4 | 4133 | -48 | 38  | 13 | 5133 | -21 | -88 | 31 |
| 3134 | -42 | -82 | 4 | 4134 | 45  | 41  | 13 | 5134 | 27  | -82 | 31 |
| 3135 | 15  | -79 | 4 | 4135 | 39  | 41  | 13 | 5135 | 21  | -82 | 31 |
| 3136 | 9   | -79 | 4 | 4136 | 12  | 41  | 13 | 5136 | 15  | -82 | 31 |
| 3137 | 39  | -76 | 4 | 4137 | 6   | 41  | 13 | 5137 | 6   | -82 | 31 |
| 3138 | -6  | -76 | 4 | 4138 | 0   | 41  | 13 | 5138 | 0   | -82 | 31 |
| 3139 | -12 | -76 | 4 | 4139 | -36 | 44  | 13 | 5139 | -6  | -82 | 31 |
| 3140 | -18 | -76 | 4 | 4140 | 45  | 47  | 13 | 5140 | -12 | -82 | 31 |
| 3141 | 48  | -73 | 4 | 4141 | 39  | 47  | 13 | 5141 | -24 | -82 | 31 |
| 3142 | 18  | -73 | 4 | 4142 | 33  | 47  | 13 | 5142 | -30 | -82 | 31 |
| 3143 | 9   | -73 | 4 | 4143 | 12  | 47  | 13 | 5143 | -36 | -82 | 31 |
| 3144 | 0   | -73 | 4 | 4144 | 6   | 47  | 13 | 5144 | 36  | -79 | 31 |
| 3145 | -45 | -73 | 4 | 4145 | -3  | 47  | 13 | 5145 | 27  | -76 | 31 |
| 3146 | -12 | -70 | 4 | 4146 | -9  | 47  | 13 | 5146 | 21  | -76 | 31 |
| 3147 | -21 | -70 | 4 | 4147 | -30 | 50  | 13 | 5147 | 15  | -76 | 31 |
| 3148 | 48  | -67 | 4 | 4148 | -36 | 50  | 13 | 5148 | 6   | -76 | 31 |
| 3149 | 42  | -67 | 4 | 4149 | 39  | 53  | 13 | 5149 | 0   | -76 | 31 |
| 3150 | 24  | -67 | 4 | 4150 | 33  | 53  | 13 | 5150 | -6  | -76 | 31 |
| 3151 | -45 | -67 | 4 | 4151 | 3   | 53  | 13 | 5151 | -12 | -76 | 31 |
| 3152 | -51 | -67 | 4 | 4152 | -3  | 53  | 13 | 5152 | -18 | -76 | 31 |
| 3153 | 54  | -64 | 4 | 4153 | -9  | 53  | 13 | 5153 | -24 | -76 | 31 |
| 3154 | 15  | -64 | 4 | 4154 | 24  | 56  | 13 | 5154 | -30 | -76 | 31 |
| 3155 | 9   | -64 | 4 | 4155 | -24 | 56  | 13 | 5155 | -36 | -76 | 31 |
| 3156 | 3   | -64 | 4 | 4156 | -30 | 56  | 13 | 5156 | -42 | -76 | 31 |
| 3157 | -3  | -64 | 4 | 4157 | -36 | 56  | 13 | 5157 | 45  | -73 | 31 |
| 3158 | -9  | -64 | 4 | 4158 | 33  | 59  | 13 | 5158 | 36  | -73 | 31 |
| 3159 | -15 | -64 | 4 | 4159 | 9   | 59  | 13 | 5159 | 27  | -70 | 31 |
| 3160 | -21 | -64 | 4 | 4160 | 3   | 59  | 13 | 5160 | 21  | -70 | 31 |
| 3161 | 24  | -61 | 4 | 4161 | -3  | 59  | 13 | 5161 | 15  | -70 | 31 |
| 3162 | -27 | -61 | 4 | 4162 | -9  | 59  | 13 | 5162 | 9   | -70 | 31 |
| 3163 | -45 | -61 | 4 | 4163 | -18 | 62  | 13 | 5163 | 0   | -70 | 31 |
| 3164 | -51 | -61 | 4 | 4164 | -24 | 62  | 13 | 5164 | -18 | -70 | 31 |
| 3165 | 48  | -58 | 4 | 4165 | 21  | 65  | 13 | 5165 | -24 | -70 | 31 |
| 3166 | 15  | -58 | 4 | 4166 | 15  | 65  | 13 | 5166 | -30 | -70 | 31 |
| 3167 | 9   | -58 | 4 | 4167 | 9   | 65  | 13 | 5167 | -36 | -70 | 31 |
| 3168 | 3   | -58 | 4 | 4168 | -9  | 65  | 13 | 5168 | -42 | -70 | 31 |
| 3169 | -3  | -58 | 4 | 4169 | 21  | -94 | 16 | 5169 | -48 | -70 | 31 |
| 3170 | -9  | -58 | 4 | 4170 | -9  | -94 | 16 | 5170 | 45  | -67 | 31 |
| 3171 | -15 | -58 | 4 | 4171 | 15  | -91 | 16 | 5171 | 36  | -67 | 31 |
| 3172 | 60  | -55 | 4 | 4172 | 9   | -91 | 16 | 5172 | -9  | -67 | 31 |

|      |     |     |   |      |     |     |    |      |     |     |    |
|------|-----|-----|---|------|-----|-----|----|------|-----|-----|----|
| 3173 | 24  | -55 | 4 | 4173 | -21 | -91 | 16 | 5173 | 21  | -64 | 31 |
| 3174 | -21 | -55 | 4 | 4174 | -27 | -91 | 16 | 5174 | 15  | -64 | 31 |
| 3175 | -48 | -55 | 4 | 4175 | 27  | -88 | 16 | 5175 | 9   | -64 | 31 |
| 3176 | -54 | -55 | 4 | 4176 | -3  | -88 | 16 | 5176 | -42 | -64 | 31 |
| 3177 | 48  | -52 | 4 | 4177 | -9  | -88 | 16 | 5177 | -48 | -64 | 31 |
| 3178 | 15  | -52 | 4 | 4178 | 9   | -85 | 16 | 5178 | 45  | -61 | 31 |
| 3179 | 9   | -52 | 4 | 4179 | -27 | -85 | 16 | 5179 | -12 | -61 | 31 |
| 3180 | 3   | -52 | 4 | 4180 | -33 | -85 | 16 | 5180 | 54  | -58 | 31 |
| 3181 | -3  | -52 | 4 | 4181 | 0   | -82 | 16 | 5181 | 15  | -58 | 31 |
| 3182 | -9  | -52 | 4 | 4182 | -9  | -82 | 16 | 5182 | 9   | -58 | 31 |
| 3183 | 60  | -49 | 4 | 4183 | -42 | -82 | 16 | 5183 | 3   | -58 | 31 |
| 3184 | -21 | -49 | 4 | 4184 | 42  | -79 | 16 | 5184 | -3  | -58 | 31 |
| 3185 | -54 | -49 | 4 | 4185 | 33  | -79 | 16 | 5185 | 45  | -55 | 31 |
| 3186 | -60 | -49 | 4 | 4186 | 9   | -79 | 16 | 5186 | -12 | -55 | 31 |
| 3187 | 21  | -46 | 4 | 4187 | -33 | -79 | 16 | 5187 | -45 | -55 | 31 |
| 3188 | 15  | -46 | 4 | 4188 | -12 | -76 | 16 | 5188 | -51 | -55 | 31 |
| 3189 | 9   | -46 | 4 | 4189 | -42 | -76 | 16 | 5189 | 57  | -52 | 31 |
| 3190 | -9  | -46 | 4 | 4190 | -48 | -76 | 16 | 5190 | 9   | -52 | 31 |
| 3191 | -21 | -43 | 4 | 4191 | 48  | -73 | 16 | 5191 | 3   | -52 | 31 |
| 3192 | 54  | -40 | 4 | 4192 | 42  | -73 | 16 | 5192 | -3  | -52 | 31 |
| 3193 | 48  | -40 | 4 | 4193 | 18  | -73 | 16 | 5193 | 51  | -49 | 31 |
| 3194 | 21  | -40 | 4 | 4194 | 9   | -73 | 16 | 5194 | -12 | -49 | 31 |
| 3195 | 15  | -40 | 4 | 4195 | 3   | -73 | 16 | 5195 | -51 | -49 | 31 |
| 3196 | 9   | -40 | 4 | 4196 | -3  | -73 | 16 | 5196 | 57  | -46 | 31 |
| 3197 | -9  | -40 | 4 | 4197 | -9  | -70 | 16 | 5197 | 9   | -46 | 31 |
| 3198 | -15 | -40 | 4 | 4198 | -42 | -70 | 16 | 5198 | 3   | -46 | 31 |
| 3199 | 63  | -37 | 4 | 4199 | -48 | -70 | 16 | 5199 | -3  | -46 | 31 |
| 3200 | -24 | -37 | 4 | 4200 | 48  | -67 | 16 | 5200 | 51  | -43 | 31 |
| 3201 | -51 | -37 | 4 | 4201 | 42  | -67 | 16 | 5201 | 9   | -40 | 31 |
| 3202 | -57 | -37 | 4 | 4202 | 18  | -67 | 16 | 5202 | 3   | -40 | 31 |
| 3203 | -63 | -37 | 4 | 4203 | 12  | -67 | 16 | 5203 | -3  | -40 | 31 |
| 3204 | 27  | -34 | 4 | 4204 | 3   | -67 | 16 | 5204 | -9  | -40 | 31 |
| 3205 | 21  | -34 | 4 | 4205 | -3  | -67 | 16 | 5205 | -54 | -40 | 31 |
| 3206 | 9   | -34 | 4 | 4206 | 54  | -64 | 16 | 5206 | -60 | -40 | 31 |
| 3207 | -9  | -34 | 4 | 4207 | -15 | -64 | 16 | 5207 | 57  | -37 | 31 |
| 3208 | -15 | -34 | 4 | 4208 | -21 | -64 | 16 | 5208 | 51  | -37 | 31 |
| 3209 | 63  | -31 | 4 | 4209 | 42  | -61 | 16 | 5209 | 9   | -34 | 31 |
| 3210 | 57  | -31 | 4 | 4210 | 24  | -61 | 16 | 5210 | 3   | -34 | 31 |
| 3211 | 51  | -31 | 4 | 4211 | 18  | -61 | 16 | 5211 | -3  | -34 | 31 |
| 3212 | 45  | -31 | 4 | 4212 | 12  | -61 | 16 | 5212 | -51 | -34 | 31 |
| 3213 | -51 | -31 | 4 | 4213 | 6   | -61 | 16 | 5213 | -60 | -34 | 31 |
| 3214 | 21  | -28 | 4 | 4214 | -3  | -61 | 16 | 5214 | 60  | -31 | 31 |
| 3215 | 12  | -28 | 4 | 4215 | -45 | -61 | 16 | 5215 | 51  | -31 | 31 |
| 3216 | -9  | -28 | 4 | 4216 | -51 | -61 | 16 | 5216 | 3   | -28 | 31 |
| 3217 | -15 | -28 | 4 | 4217 | 48  | -58 | 16 | 5217 | -3  | -28 | 31 |
| 3218 | -21 | -28 | 4 | 4218 | -9  | -58 | 16 | 5218 | -57 | -28 | 31 |
| 3219 | -45 | -28 | 4 | 4219 | -15 | -58 | 16 | 5219 | 60  | -25 | 31 |

|      |     |     |   |      |     |     |    |      |     |     |    |
|------|-----|-----|---|------|-----|-----|----|------|-----|-----|----|
| 3220 | -60 | -28 | 4 | 4220 | -21 | -58 | 16 | 5220 | 54  | -25 | 31 |
| 3221 | 63  | -25 | 4 | 4221 | 24  | -55 | 16 | 5221 | -6  | -22 | 31 |
| 3222 | 57  | -25 | 4 | 4222 | 18  | -55 | 16 | 5222 | -57 | -22 | 31 |
| 3223 | 51  | -25 | 4 | 4223 | 12  | -55 | 16 | 5223 | 60  | -19 | 31 |
| 3224 | 45  | -25 | 4 | 4224 | -42 | -55 | 16 | 5224 | 6   | -16 | 31 |
| 3225 | -36 | -25 | 4 | 4225 | -51 | -55 | 16 | 5225 | 0   | -16 | 31 |
| 3226 | 36  | -22 | 4 | 4226 | 48  | -52 | 16 | 5226 | -51 | -16 | 31 |
| 3227 | 18  | -22 | 4 | 4227 | 3   | -52 | 16 | 5227 | -57 | -16 | 31 |
| 3228 | 12  | -22 | 4 | 4228 | -3  | -52 | 16 | 5228 | 57  | -13 | 31 |
| 3229 | 3   | -22 | 4 | 4229 | -9  | -52 | 16 | 5229 | 51  | -13 | 31 |
| 3230 | -3  | -22 | 4 | 4230 | 60  | -49 | 16 | 5230 | 6   | -10 | 31 |
| 3231 | -9  | -22 | 4 | 4231 | 12  | -49 | 16 | 5231 | 0   | -10 | 31 |
| 3232 | -15 | -22 | 4 | 4232 | -45 | -49 | 16 | 5232 | -48 | -10 | 31 |
| 3233 | -45 | -22 | 4 | 4233 | -51 | -49 | 16 | 5233 | -57 | -10 | 31 |
| 3234 | -51 | -22 | 4 | 4234 | -60 | -49 | 16 | 5234 | 57  | -7  | 31 |
| 3235 | -57 | -22 | 4 | 4235 | 48  | -46 | 16 | 5235 | 51  | -7  | 31 |
| 3236 | 63  | -19 | 4 | 4236 | 3   | -46 | 16 | 5236 | 6   | -4  | 31 |
| 3237 | 57  | -19 | 4 | 4237 | -3  | -46 | 16 | 5237 | -3  | -4  | 31 |
| 3238 | 51  | -19 | 4 | 4238 | -51 | -43 | 16 | 5238 | -48 | -4  | 31 |
| 3239 | 45  | -19 | 4 | 4239 | 54  | -40 | 16 | 5239 | 54  | 2   | 31 |
| 3240 | -30 | -19 | 4 | 4240 | 48  | -40 | 16 | 5240 | 48  | 2   | 31 |
| 3241 | -36 | -19 | 4 | 4241 | 63  | -37 | 16 | 5241 | 6   | 2   | 31 |
| 3242 | 33  | -16 | 4 | 4242 | -42 | -37 | 16 | 5242 | 39  | 5   | 31 |
| 3243 | 9   | -16 | 4 | 4243 | -48 | -37 | 16 | 5243 | -39 | 5   | 31 |
| 3244 | 3   | -16 | 4 | 4244 | -57 | -37 | 16 | 5244 | -45 | 5   | 31 |
| 3245 | -3  | -16 | 4 | 4245 | 54  | -34 | 16 | 5245 | -51 | 5   | 31 |
| 3246 | -9  | -16 | 4 | 4246 | 48  | -34 | 16 | 5246 | 57  | 8   | 31 |
| 3247 | -15 | -16 | 4 | 4247 | 42  | -34 | 16 | 5247 | 48  | 8   | 31 |
| 3248 | -45 | -16 | 4 | 4248 | 63  | -31 | 16 | 5248 | 6   | 8   | 31 |
| 3249 | -51 | -16 | 4 | 4249 | -36 | -31 | 16 | 5249 | 0   | 8   | 31 |
| 3250 | -57 | -16 | 4 | 4250 | -42 | -31 | 16 | 5250 | -6  | 8   | 31 |
| 3251 | 63  | -13 | 4 | 4251 | -48 | -31 | 16 | 5251 | 36  | 11  | 31 |
| 3252 | 57  | -13 | 4 | 4252 | -57 | -31 | 16 | 5252 | -39 | 11  | 31 |
| 3253 | 51  | -13 | 4 | 4253 | 54  | -28 | 16 | 5253 | -45 | 11  | 31 |
| 3254 | 45  | -13 | 4 | 4254 | 48  | -28 | 16 | 5254 | 51  | 14  | 31 |
| 3255 | 39  | -10 | 4 | 4255 | 42  | -28 | 16 | 5255 | 45  | 14  | 31 |
| 3256 | 33  | -10 | 4 | 4256 | 36  | -28 | 16 | 5256 | 36  | 17  | 31 |
| 3257 | 27  | -10 | 4 | 4257 | -15 | -28 | 16 | 5257 | 3   | 17  | 31 |
| 3258 | 9   | -10 | 4 | 4258 | 63  | -25 | 16 | 5258 | -3  | 17  | 31 |
| 3259 | 3   | -10 | 4 | 4259 | 18  | -25 | 16 | 5259 | -9  | 17  | 31 |
| 3260 | -3  | -10 | 4 | 4260 | 9   | -25 | 16 | 5260 | -48 | 17  | 31 |
| 3261 | -9  | -10 | 4 | 4261 | -36 | -25 | 16 | 5261 | 51  | 20  | 31 |
| 3262 | -30 | -10 | 4 | 4262 | -42 | -25 | 16 | 5262 | 45  | 20  | 31 |
| 3263 | -39 | -10 | 4 | 4263 | -48 | -25 | 16 | 5263 | 36  | 23  | 31 |
| 3264 | -45 | -10 | 4 | 4264 | -54 | -25 | 16 | 5264 | 12  | 23  | 31 |
| 3265 | -51 | -10 | 4 | 4265 | 48  | -22 | 16 | 5265 | 6   | 23  | 31 |
| 3266 | -57 | -10 | 4 | 4266 | 42  | -22 | 16 | 5266 | 0   | 23  | 31 |

|      |     |    |   |      |     |     |    |      |     |     |    |
|------|-----|----|---|------|-----|-----|----|------|-----|-----|----|
| 3267 | 63  | -7 | 4 | 4267 | 36  | -22 | 16 | 5267 | -36 | 23  | 31 |
| 3268 | 57  | -7 | 4 | 4268 | -9  | -22 | 16 | 5268 | -42 | 23  | 31 |
| 3269 | 51  | -7 | 4 | 4269 | -15 | -22 | 16 | 5269 | -48 | 23  | 31 |
| 3270 | 45  | -4 | 4 | 4270 | 63  | -19 | 16 | 5270 | -9  | 26  | 31 |
| 3271 | 39  | -4 | 4 | 4271 | 57  | -19 | 16 | 5271 | 48  | 29  | 31 |
| 3272 | 33  | -4 | 4 | 4272 | 15  | -19 | 16 | 5272 | 42  | 29  | 31 |
| 3273 | 27  | -4 | 4 | 4273 | -36 | -19 | 16 | 5273 | 36  | 29  | 31 |
| 3274 | 9   | -4 | 4 | 4274 | -42 | -19 | 16 | 5274 | -33 | 29  | 31 |
| 3275 | 3   | -4 | 4 | 4275 | -48 | -19 | 16 | 5275 | -39 | 29  | 31 |
| 3276 | -3  | -4 | 4 | 4276 | 9   | -16 | 16 | 5276 | 9   | 32  | 31 |
| 3277 | -9  | -4 | 4 | 4277 | 3   | -16 | 16 | 5277 | 3   | 32  | 31 |
| 3278 | -24 | -4 | 4 | 4278 | -3  | -16 | 16 | 5278 | -3  | 32  | 31 |
| 3279 | -33 | -4 | 4 | 4279 | -9  | -16 | 16 | 5279 | -9  | 32  | 31 |
| 3280 | -39 | -4 | 4 | 4280 | -15 | -16 | 16 | 5280 | -24 | 32  | 31 |
| 3281 | -45 | -4 | 4 | 4281 | -57 | -16 | 16 | 5281 | 42  | 35  | 31 |
| 3282 | -51 | -4 | 4 | 4282 | 63  | -13 | 16 | 5282 | 36  | 35  | 31 |
| 3283 | -57 | -4 | 4 | 4283 | 57  | -13 | 16 | 5283 | -33 | 35  | 31 |
| 3284 | 60  | 2  | 4 | 4284 | 51  | -13 | 16 | 5284 | -39 | 35  | 31 |
| 3285 | 51  | 2  | 4 | 4285 | 45  | -13 | 16 | 5285 | 30  | 38  | 31 |
| 3286 | 45  | 2  | 4 | 4286 | 39  | -13 | 16 | 5286 | 24  | 38  | 31 |
| 3287 | 39  | 2  | 4 | 4287 | 33  | -13 | 16 | 5287 | 6   | 41  | 31 |
| 3288 | 33  | 2  | 4 | 4288 | -36 | -13 | 16 | 5288 | 0   | 41  | 31 |
| 3289 | 24  | 2  | 4 | 4289 | -42 | -13 | 16 | 5289 | -6  | 41  | 31 |
| 3290 | 6   | 2  | 4 | 4290 | -48 | -13 | 16 | 5290 | -27 | 41  | 31 |
| 3291 | 0   | 2  | 4 | 4291 | 9   | -10 | 16 | 5291 | -33 | 41  | 31 |
| 3292 | -27 | 2  | 4 | 4292 | 3   | -10 | 16 | 5292 | 36  | 44  | 31 |
| 3293 | -33 | 2  | 4 | 4293 | -3  | -10 | 16 | 5293 | 30  | 44  | 31 |
| 3294 | -39 | 2  | 4 | 4294 | -9  | -10 | 16 | 5294 | 24  | 44  | 31 |
| 3295 | -45 | 2  | 4 | 4295 | -15 | -10 | 16 | 5295 | 6   | 47  | 31 |
| 3296 | -51 | 2  | 4 | 4296 | -57 | -10 | 16 | 5296 | 0   | 47  | 31 |
| 3297 | -57 | 2  | 4 | 4297 | 63  | -7  | 16 | 5297 | -6  | 47  | 31 |
| 3298 | -9  | 5  | 4 | 4298 | 57  | -7  | 16 | 5298 | -27 | 47  | 31 |
| 3299 | -18 | 5  | 4 | 4299 | 51  | -7  | 16 | 5299 | 30  | 50  | 31 |
| 3300 | 57  | 8  | 4 | 4300 | -33 | -7  | 16 | 5300 | 24  | 50  | 31 |
| 3301 | 51  | 8  | 4 | 4301 | -42 | -7  | 16 | 5301 | 18  | 50  | 31 |
| 3302 | 45  | 8  | 4 | 4302 | -48 | -7  | 16 | 5302 | -12 | 50  | 31 |
| 3303 | 39  | 8  | 4 | 4303 | 45  | -4  | 16 | 5303 | -21 | 53  | 31 |
| 3304 | 30  | 8  | 4 | 4304 | 39  | -4  | 16 | 5304 | 18  | 56  | 31 |
| 3305 | 24  | 8  | 4 | 4305 | 33  | -4  | 16 | 5305 | 6   | 56  | 31 |
| 3306 | 18  | 8  | 4 | 4306 | 15  | -4  | 16 | 5306 | 0   | 56  | 31 |
| 3307 | 6   | 8  | 4 | 4307 | 9   | -4  | 16 | 5307 | -6  | 56  | 31 |
| 3308 | -45 | 8  | 4 | 4308 | 3   | -4  | 16 | 5308 | -12 | 56  | 31 |
| 3309 | -51 | 8  | 4 | 4309 | -3  | -4  | 16 | 5309 | 24  | -85 | 34 |
| 3310 | -15 | 11 | 4 | 4310 | -9  | -4  | 16 | 5310 | 18  | -85 | 34 |
| 3311 | -24 | 11 | 4 | 4311 | -57 | -4  | 16 | 5311 | 12  | -85 | 34 |
| 3312 | -30 | 11 | 4 | 4312 | 57  | -1  | 16 | 5312 | -9  | -85 | 34 |
| 3313 | -36 | 11 | 4 | 4313 | 45  | 2   | 16 | 5313 | -15 | -85 | 34 |

|      |     |    |   |      |     |    |    |      |     |     |    |
|------|-----|----|---|------|-----|----|----|------|-----|-----|----|
| 3314 | 51  | 14 | 4 | 4314 | 39  | 2  | 16 | 5314 | 30  | -79 | 34 |
| 3315 | 45  | 14 | 4 | 4315 | 33  | 2  | 16 | 5315 | 24  | -79 | 34 |
| 3316 | 36  | 14 | 4 | 4316 | -15 | 2  | 16 | 5316 | 18  | -79 | 34 |
| 3317 | 30  | 14 | 4 | 4317 | -39 | 2  | 16 | 5317 | 12  | -79 | 34 |
| 3318 | 24  | 14 | 4 | 4318 | -51 | 2  | 16 | 5318 | 3   | -79 | 34 |
| 3319 | 18  | 14 | 4 | 4319 | -57 | 2  | 16 | 5319 | -3  | -79 | 34 |
| 3320 | 12  | 14 | 4 | 4320 | 60  | 5  | 16 | 5320 | -9  | -79 | 34 |
| 3321 | 6   | 14 | 4 | 4321 | 9   | 5  | 16 | 5321 | -15 | -79 | 34 |
| 3322 | -6  | 14 | 4 | 4322 | 51  | 8  | 16 | 5322 | -21 | -79 | 34 |
| 3323 | -15 | 17 | 4 | 4323 | 45  | 8  | 16 | 5323 | -27 | -79 | 34 |
| 3324 | -24 | 17 | 4 | 4324 | 18  | 8  | 16 | 5324 | -33 | -79 | 34 |
| 3325 | -30 | 17 | 4 | 4325 | -9  | 8  | 16 | 5325 | 39  | -76 | 34 |
| 3326 | -36 | 17 | 4 | 4326 | -51 | 8  | 16 | 5326 | 30  | -73 | 34 |
| 3327 | -42 | 17 | 4 | 4327 | 9   | 11 | 16 | 5327 | 24  | -73 | 34 |
| 3328 | -48 | 17 | 4 | 4328 | -15 | 11 | 16 | 5328 | 18  | -73 | 34 |
| 3329 | 51  | 20 | 4 | 4329 | 57  | 14 | 16 | 5329 | 12  | -73 | 34 |
| 3330 | 45  | 20 | 4 | 4330 | 51  | 14 | 16 | 5330 | 3   | -73 | 34 |
| 3331 | 36  | 20 | 4 | 4331 | 45  | 14 | 16 | 5331 | -3  | -73 | 34 |
| 3332 | 30  | 20 | 4 | 4332 | -51 | 14 | 16 | 5332 | -9  | -73 | 34 |
| 3333 | 24  | 20 | 4 | 4333 | 15  | 17 | 16 | 5333 | -15 | -73 | 34 |
| 3334 | 18  | 20 | 4 | 4334 | -15 | 17 | 16 | 5334 | -21 | -73 | 34 |
| 3335 | 12  | 20 | 4 | 4335 | 51  | 20 | 16 | 5335 | -27 | -73 | 34 |
| 3336 | 6   | 20 | 4 | 4336 | 45  | 20 | 16 | 5336 | -33 | -73 | 34 |
| 3337 | -12 | 23 | 4 | 4337 | -45 | 20 | 16 | 5337 | -39 | -73 | 34 |
| 3338 | -18 | 23 | 4 | 4338 | -51 | 20 | 16 | 5338 | 42  | -70 | 34 |
| 3339 | -30 | 23 | 4 | 4339 | 51  | 26 | 16 | 5339 | 30  | -67 | 34 |
| 3340 | -36 | 23 | 4 | 4340 | 45  | 26 | 16 | 5340 | 24  | -67 | 34 |
| 3341 | -42 | 23 | 4 | 4341 | 3   | 26 | 16 | 5341 | 18  | -67 | 34 |
| 3342 | -48 | 23 | 4 | 4342 | -3  | 26 | 16 | 5342 | 12  | -67 | 34 |
| 3343 | 51  | 26 | 4 | 4343 | -48 | 29 | 16 | 5343 | 6   | -67 | 34 |
| 3344 | 45  | 26 | 4 | 4344 | 51  | 32 | 16 | 5344 | -3  | -67 | 34 |
| 3345 | 36  | 26 | 4 | 4345 | 9   | 32 | 16 | 5345 | -15 | -67 | 34 |
| 3346 | 30  | 26 | 4 | 4346 | 3   | 32 | 16 | 5346 | -21 | -67 | 34 |
| 3347 | 18  | 26 | 4 | 4347 | -3  | 32 | 16 | 5347 | -27 | -67 | 34 |
| 3348 | -30 | 29 | 4 | 4348 | -9  | 32 | 16 | 5348 | -33 | -67 | 34 |
| 3349 | -36 | 29 | 4 | 4349 | 45  | 35 | 16 | 5349 | -39 | -67 | 34 |
| 3350 | -48 | 29 | 4 | 4350 | 39  | 35 | 16 | 5350 | -45 | -67 | 34 |
| 3351 | 51  | 32 | 4 | 4351 | -45 | 35 | 16 | 5351 | 51  | -64 | 34 |
| 3352 | 42  | 32 | 4 | 4352 | 9   | 38 | 16 | 5352 | 42  | -64 | 34 |
| 3353 | 36  | 32 | 4 | 4353 | 3   | 38 | 16 | 5353 | 18  | -61 | 34 |
| 3354 | -45 | 35 | 4 | 4354 | -3  | 38 | 16 | 5354 | 12  | -61 | 34 |
| 3355 | 48  | 38 | 4 | 4355 | -9  | 41 | 16 | 5355 | 6   | -61 | 34 |
| 3356 | 42  | 38 | 4 | 4356 | -42 | 41 | 16 | 5356 | 0   | -61 | 34 |
| 3357 | 9   | 38 | 4 | 4357 | 42  | 44 | 16 | 5357 | -6  | -61 | 34 |
| 3358 | 3   | 38 | 4 | 4358 | 36  | 44 | 16 | 5358 | -39 | -61 | 34 |
| 3359 | -6  | 38 | 4 | 4359 | 9   | 44 | 16 | 5359 | -45 | -61 | 34 |
| 3360 | -45 | 41 | 4 | 4360 | 3   | 44 | 16 | 5360 | -51 | -61 | 34 |

|      |     |     |   |      |     |     |    |      |     |     |    |
|------|-----|-----|---|------|-----|-----|----|------|-----|-----|----|
| 3361 | 48  | 44  | 4 | 4361 | -30 | 44  | 16 | 5361 | 48  | -58 | 34 |
| 3362 | 42  | 44  | 4 | 4362 | 27  | 47  | 16 | 5362 | 42  | -58 | 34 |
| 3363 | 9   | 44  | 4 | 4363 | -39 | 47  | 16 | 5363 | 12  | -55 | 34 |
| 3364 | 3   | 44  | 4 | 4364 | 42  | 50  | 16 | 5364 | 6   | -55 | 34 |
| 3365 | -6  | 44  | 4 | 4365 | 36  | 50  | 16 | 5365 | 0   | -55 | 34 |
| 3366 | -12 | 44  | 4 | 4366 | 9   | 50  | 16 | 5366 | -6  | -55 | 34 |
| 3367 | -36 | 47  | 4 | 4367 | 0   | 50  | 16 | 5367 | 48  | -52 | 34 |
| 3368 | 42  | 50  | 4 | 4368 | -6  | 50  | 16 | 5368 | -48 | -52 | 34 |
| 3369 | 36  | 50  | 4 | 4369 | -12 | 50  | 16 | 5369 | -54 | -52 | 34 |
| 3370 | 9   | 50  | 4 | 4370 | -24 | 50  | 16 | 5370 | 15  | -49 | 34 |
| 3371 | 0   | 50  | 4 | 4371 | 27  | 53  | 16 | 5371 | 6   | -49 | 34 |
| 3372 | -6  | 50  | 4 | 4372 | -33 | 53  | 16 | 5372 | 0   | -49 | 34 |
| 3373 | -12 | 50  | 4 | 4373 | 36  | 56  | 16 | 5373 | -6  | -49 | 34 |
| 3374 | -27 | 53  | 4 | 4374 | 6   | 56  | 16 | 5374 | 48  | -46 | 34 |
| 3375 | -36 | 53  | 4 | 4375 | 0   | 56  | 16 | 5375 | -54 | -46 | 34 |
| 3376 | 36  | 56  | 4 | 4376 | -6  | 56  | 16 | 5376 | 60  | -43 | 34 |
| 3377 | 30  | 56  | 4 | 4377 | -12 | 56  | 16 | 5377 | 12  | -43 | 34 |
| 3378 | 24  | 56  | 4 | 4378 | 27  | 59  | 16 | 5378 | 6   | -43 | 34 |
| 3379 | 6   | 56  | 4 | 4379 | 21  | 59  | 16 | 5379 | 0   | -43 | 34 |
| 3380 | 0   | 56  | 4 | 4380 | -21 | 59  | 16 | 5380 | -6  | -43 | 34 |
| 3381 | -6  | 56  | 4 | 4381 | -27 | 59  | 16 | 5381 | -12 | -43 | 34 |
| 3382 | -12 | 56  | 4 | 4382 | 12  | 62  | 16 | 5382 | 54  | -40 | 34 |
| 3383 | -27 | 59  | 4 | 4383 | 6   | 62  | 16 | 5383 | 12  | -37 | 34 |
| 3384 | 30  | 62  | 4 | 4384 | -6  | 62  | 16 | 5384 | 6   | -37 | 34 |
| 3385 | 24  | 62  | 4 | 4385 | -12 | 62  | 16 | 5385 | 0   | -37 | 34 |
| 3386 | 18  | 62  | 4 | 4386 | -15 | -94 | 19 | 5386 | -6  | -37 | 34 |
| 3387 | 12  | 62  | 4 | 4387 | 24  | -91 | 19 | 5387 | -57 | -37 | 34 |
| 3388 | 6   | 62  | 4 | 4388 | -6  | -91 | 19 | 5388 | 54  | -34 | 34 |
| 3389 | 0   | 62  | 4 | 4389 | 18  | -88 | 19 | 5389 | 6   | -31 | 34 |
| 3390 | -6  | 62  | 4 | 4390 | 12  | -88 | 19 | 5390 | 0   | -31 | 34 |
| 3391 | -12 | 62  | 4 | 4391 | 6   | -88 | 19 | 5391 | -6  | -31 | 34 |
| 3392 | -21 | 65  | 4 | 4392 | -18 | -88 | 19 | 5392 | -54 | -31 | 34 |
| 3393 | 15  | -97 | 7 | 4393 | -24 | -88 | 19 | 5393 | 63  | -28 | 34 |
| 3394 | -6  | -97 | 7 | 4394 | -30 | -88 | 19 | 5394 | 57  | -28 | 34 |
| 3395 | -12 | -97 | 7 | 4395 | 36  | -85 | 19 | 5395 | 9   | -25 | 34 |
| 3396 | 27  | -94 | 7 | 4396 | 30  | -85 | 19 | 5396 | 0   | -25 | 34 |
| 3397 | 9   | -94 | 7 | 4397 | 24  | -85 | 19 | 5397 | -51 | -25 | 34 |
| 3398 | 3   | -94 | 7 | 4398 | -6  | -85 | 19 | 5398 | -60 | -25 | 34 |
| 3399 | -18 | -94 | 7 | 4399 | 12  | -82 | 19 | 5399 | 57  | -22 | 34 |
| 3400 | -24 | -94 | 7 | 4400 | 6   | -82 | 19 | 5400 | 51  | -22 | 34 |
| 3401 | -6  | -91 | 7 | 4401 | -24 | -82 | 19 | 5401 | 3   | -19 | 34 |
| 3402 | -12 | -91 | 7 | 4402 | -30 | -82 | 19 | 5402 | -3  | -19 | 34 |
| 3403 | -33 | -91 | 7 | 4403 | -36 | -82 | 19 | 5403 | -48 | -19 | 34 |
| 3404 | 12  | -88 | 7 | 4404 | -3  | -79 | 19 | 5404 | -54 | -19 | 34 |
| 3405 | 3   | -88 | 7 | 4405 | 45  | -76 | 19 | 5405 | 54  | -16 | 34 |
| 3406 | 39  | -85 | 7 | 4406 | 39  | -76 | 19 | 5406 | 48  | -16 | 34 |
| 3407 | 33  | -85 | 7 | 4407 | 12  | -76 | 19 | 5407 | 3   | -13 | 34 |

|      |     |     |   |      |     |     |    |      |     |     |    |
|------|-----|-----|---|------|-----|-----|----|------|-----|-----|----|
| 3408 | -6  | -85 | 7 | 4408 | 6   | -76 | 19 | 5408 | -3  | -13 | 34 |
| 3409 | -12 | -85 | 7 | 4409 | -36 | -76 | 19 | 5409 | -45 | -13 | 34 |
| 3410 | -33 | -85 | 7 | 4410 | -15 | -73 | 19 | 5410 | -54 | -13 | 34 |
| 3411 | -39 | -85 | 7 | 4411 | -45 | -73 | 19 | 5411 | 60  | -10 | 34 |
| 3412 | 12  | -82 | 7 | 4412 | 45  | -70 | 19 | 5412 | 54  | -10 | 34 |
| 3413 | 6   | -82 | 7 | 4413 | 39  | -70 | 19 | 5413 | 48  | -10 | 34 |
| 3414 | 0   | -82 | 7 | 4414 | 15  | -70 | 19 | 5414 | 3   | -7  | 34 |
| 3415 | 45  | -79 | 7 | 4415 | 6   | -70 | 19 | 5415 | -6  | -7  | 34 |
| 3416 | 36  | -79 | 7 | 4416 | 0   | -70 | 19 | 5416 | -51 | -7  | 34 |
| 3417 | -15 | -79 | 7 | 4417 | -12 | -67 | 19 | 5417 | 54  | -4  | 34 |
| 3418 | -39 | -79 | 7 | 4418 | -18 | -67 | 19 | 5418 | 48  | -4  | 34 |
| 3419 | -45 | -79 | 7 | 4419 | -39 | -67 | 19 | 5419 | 3   | -1  | 34 |
| 3420 | 12  | -76 | 7 | 4420 | -45 | -67 | 19 | 5420 | -6  | -1  | 34 |
| 3421 | 6   | -76 | 7 | 4421 | -51 | -67 | 19 | 5421 | -42 | -1  | 34 |
| 3422 | 42  | -73 | 7 | 4422 | 45  | -64 | 19 | 5422 | -51 | -1  | 34 |
| 3423 | -9  | -73 | 7 | 4423 | 21  | -64 | 19 | 5423 | 42  | 2   | 34 |
| 3424 | -15 | -73 | 7 | 4424 | 15  | -64 | 19 | 5424 | 51  | 5   | 34 |
| 3425 | 51  | -70 | 7 | 4425 | 9   | -64 | 19 | 5425 | 3   | 5   | 34 |
| 3426 | 21  | -70 | 7 | 4426 | 0   | -64 | 19 | 5426 | -3  | 5   | 34 |
| 3427 | 15  | -70 | 7 | 4427 | -6  | -64 | 19 | 5427 | 42  | 8   | 34 |
| 3428 | 6   | -70 | 7 | 4428 | 51  | -61 | 19 | 5428 | -36 | 8   | 34 |
| 3429 | -3  | -70 | 7 | 4429 | -12 | -61 | 19 | 5429 | -42 | 8   | 34 |
| 3430 | -42 | -70 | 7 | 4430 | -18 | -61 | 19 | 5430 | -48 | 8   | 34 |
| 3431 | -48 | -70 | 7 | 4431 | 57  | -58 | 19 | 5431 | 54  | 11  | 34 |
| 3432 | -18 | -67 | 7 | 4432 | 21  | -58 | 19 | 5432 | 9   | 11  | 34 |
| 3433 | -24 | -67 | 7 | 4433 | 15  | -58 | 19 | 5433 | 3   | 11  | 34 |
| 3434 | 45  | -64 | 7 | 4434 | 9   | -58 | 19 | 5434 | -3  | 11  | 34 |
| 3435 | 27  | -64 | 7 | 4435 | 3   | -58 | 19 | 5435 | -9  | 11  | 34 |
| 3436 | 21  | -64 | 7 | 4436 | -48 | -58 | 19 | 5436 | 39  | 14  | 34 |
| 3437 | -42 | -64 | 7 | 4437 | -54 | -58 | 19 | 5437 | -36 | 14  | 34 |
| 3438 | -48 | -64 | 7 | 4438 | 51  | -55 | 19 | 5438 | -42 | 14  | 34 |
| 3439 | -54 | -64 | 7 | 4439 | 45  | -55 | 19 | 5439 | -51 | 14  | 34 |
| 3440 | 51  | -61 | 7 | 4440 | -6  | -55 | 19 | 5440 | 48  | 17  | 34 |
| 3441 | 12  | -61 | 7 | 4441 | -12 | -55 | 19 | 5441 | 12  | 17  | 34 |
| 3442 | 6   | -61 | 7 | 4442 | 57  | -52 | 19 | 5442 | 39  | 20  | 34 |
| 3443 | 0   | -61 | 7 | 4443 | 15  | -52 | 19 | 5443 | -6  | 20  | 34 |
| 3444 | -6  | -61 | 7 | 4444 | 9   | -52 | 19 | 5444 | -12 | 20  | 34 |
| 3445 | -12 | -61 | 7 | 4445 | -48 | -52 | 19 | 5445 | -39 | 20  | 34 |
| 3446 | -18 | -61 | 7 | 4446 | -54 | -52 | 19 | 5446 | -45 | 20  | 34 |
| 3447 | 57  | -58 | 7 | 4447 | 51  | -49 | 19 | 5447 | 48  | 23  | 34 |
| 3448 | 27  | -58 | 7 | 4448 | 45  | -49 | 19 | 5448 | 39  | 26  | 34 |
| 3449 | 21  | -58 | 7 | 4449 | 0   | -49 | 19 | 5449 | 33  | 26  | 34 |
| 3450 | -24 | -58 | 7 | 4450 | -6  | -49 | 19 | 5450 | 9   | 26  | 34 |
| 3451 | -57 | -58 | 7 | 4451 | 57  | -46 | 19 | 5451 | 3   | 26  | 34 |
| 3452 | 51  | -55 | 7 | 4452 | 9   | -46 | 19 | 5452 | -3  | 26  | 34 |
| 3453 | 45  | -55 | 7 | 4453 | -48 | -46 | 19 | 5453 | -30 | 26  | 34 |
| 3454 | 12  | -55 | 7 | 4454 | -54 | -46 | 19 | 5454 | -45 | 26  | 34 |

|      |     |     |   |      |     |     |    |      |     |     |    |
|------|-----|-----|---|------|-----|-----|----|------|-----|-----|----|
| 3455 | 6   | -55 | 7 | 4455 | 63  | -43 | 19 | 5455 | 27  | 29  | 34 |
| 3456 | 0   | -55 | 7 | 4456 | 51  | -43 | 19 | 5456 | 45  | 32  | 34 |
| 3457 | -6  | -55 | 7 | 4457 | 45  | -43 | 19 | 5457 | 39  | 32  | 34 |
| 3458 | -12 | -55 | 7 | 4458 | 0   | -43 | 19 | 5458 | 33  | 32  | 34 |
| 3459 | 57  | -52 | 7 | 4459 | -60 | -43 | 19 | 5459 | -30 | 32  | 34 |
| 3460 | 27  | -52 | 7 | 4460 | -45 | -40 | 19 | 5460 | -36 | 32  | 34 |
| 3461 | 21  | -52 | 7 | 4461 | -54 | -40 | 19 | 5461 | -42 | 32  | 34 |
| 3462 | -18 | -52 | 7 | 4462 | 57  | -37 | 19 | 5462 | 27  | 35  | 34 |
| 3463 | -51 | -52 | 7 | 4463 | 51  | -37 | 19 | 5463 | 21  | 35  | 34 |
| 3464 | -57 | -52 | 7 | 4464 | 45  | -37 | 19 | 5464 | 6   | 35  | 34 |
| 3465 | 51  | -49 | 7 | 4465 | -39 | -34 | 19 | 5465 | 0   | 35  | 34 |
| 3466 | 12  | -49 | 7 | 4466 | -45 | -34 | 19 | 5466 | -6  | 35  | 34 |
| 3467 | 6   | -49 | 7 | 4467 | -51 | -34 | 19 | 5467 | -21 | 35  | 34 |
| 3468 | -6  | -49 | 7 | 4468 | -60 | -34 | 19 | 5468 | 39  | 38  | 34 |
| 3469 | -12 | -49 | 7 | 4469 | 57  | -31 | 19 | 5469 | -30 | 38  | 34 |
| 3470 | 63  | -46 | 7 | 4470 | 51  | -31 | 19 | 5470 | -36 | 38  | 34 |
| 3471 | 57  | -46 | 7 | 4471 | 45  | -31 | 19 | 5471 | 33  | 41  | 34 |
| 3472 | -48 | -46 | 7 | 4472 | 39  | -31 | 19 | 5472 | 27  | 41  | 34 |
| 3473 | -57 | -46 | 7 | 4473 | -33 | -28 | 19 | 5473 | 21  | 41  | 34 |
| 3474 | -63 | -46 | 7 | 4474 | -39 | -28 | 19 | 5474 | -21 | 41  | 34 |
| 3475 | 51  | -43 | 7 | 4475 | -45 | -28 | 19 | 5475 | 9   | 44  | 34 |
| 3476 | 12  | -43 | 7 | 4476 | -51 | -28 | 19 | 5476 | 3   | 44  | 34 |
| 3477 | 6   | -43 | 7 | 4477 | -60 | -28 | 19 | 5477 | -3  | 44  | 34 |
| 3478 | -6  | -43 | 7 | 4478 | 57  | -25 | 19 | 5478 | -9  | 44  | 34 |
| 3479 | -12 | -43 | 7 | 4479 | 51  | -25 | 19 | 5479 | -30 | 44  | 34 |
| 3480 | 66  | -40 | 7 | 4480 | 45  | -25 | 19 | 5480 | 27  | 47  | 34 |
| 3481 | 60  | -40 | 7 | 4481 | 39  | -25 | 19 | 5481 | 21  | 47  | 34 |
| 3482 | -48 | -40 | 7 | 4482 | 33  | -25 | 19 | 5482 | 15  | 47  | 34 |
| 3483 | -54 | -40 | 7 | 4483 | 12  | -22 | 19 | 5483 | -15 | 47  | 34 |
| 3484 | -60 | -40 | 7 | 4484 | -33 | -22 | 19 | 5484 | -21 | 47  | 34 |
| 3485 | 51  | -37 | 7 | 4485 | -39 | -22 | 19 | 5485 | 9   | 50  | 34 |
| 3486 | 45  | -37 | 7 | 4486 | -45 | -22 | 19 | 5486 | 3   | 50  | 34 |
| 3487 | 24  | -37 | 7 | 4487 | -51 | -22 | 19 | 5487 | -3  | 50  | 34 |
| 3488 | 18  | -37 | 7 | 4488 | -57 | -22 | 19 | 5488 | 21  | 53  | 34 |
| 3489 | 12  | -37 | 7 | 4489 | 51  | -19 | 19 | 5489 | 15  | 53  | 34 |
| 3490 | -12 | -37 | 7 | 4490 | 45  | -19 | 19 | 5490 | -9  | 53  | 34 |
| 3491 | -18 | -37 | 7 | 4491 | 39  | -19 | 19 | 5491 | -15 | 53  | 34 |
| 3492 | 66  | -34 | 7 | 4492 | 33  | -19 | 19 | 5492 | 27  | -82 | 37 |
| 3493 | 60  | -34 | 7 | 4493 | -6  | -19 | 19 | 5493 | 21  | -82 | 37 |
| 3494 | -45 | -34 | 7 | 4494 | -12 | -19 | 19 | 5494 | 15  | -82 | 37 |
| 3495 | -54 | -34 | 7 | 4495 | 60  | -16 | 19 | 5495 | 9   | -82 | 37 |
| 3496 | -60 | -34 | 7 | 4496 | -39 | -16 | 19 | 5496 | 0   | -82 | 37 |
| 3497 | 24  | -31 | 7 | 4497 | -45 | -16 | 19 | 5497 | -6  | -82 | 37 |
| 3498 | 18  | -31 | 7 | 4498 | -51 | -16 | 19 | 5498 | -12 | -82 | 37 |
| 3499 | -6  | -31 | 7 | 4499 | 15  | -13 | 19 | 5499 | -18 | -82 | 37 |
| 3500 | -12 | -31 | 7 | 4500 | 6   | -13 | 19 | 5500 | -24 | -82 | 37 |
| 3501 | -18 | -31 | 7 | 4501 | -6  | -13 | 19 | 5501 | 33  | -76 | 37 |



|      |     |     |   |      |     |     |    |      |     |     |    |
|------|-----|-----|---|------|-----|-----|----|------|-----|-----|----|
| 3502 | 66  | -28 | 7 | 4502 | -12 | -13 | 19 | 5502 | 27  | -76 | 37 |
| 3503 | 60  | -28 | 7 | 4503 | -60 | -13 | 19 | 5503 | 21  | -76 | 37 |
| 3504 | 54  | -28 | 7 | 4504 | 60  | -10 | 19 | 5504 | 15  | -76 | 37 |
| 3505 | 48  | -28 | 7 | 4505 | 54  | -10 | 19 | 5505 | 9   | -76 | 37 |
| 3506 | 6   | -28 | 7 | 4506 | 48  | -10 | 19 | 5506 | 0   | -76 | 37 |
| 3507 | -39 | -28 | 7 | 4507 | 42  | -10 | 19 | 5507 | -6  | -76 | 37 |
| 3508 | -54 | -28 | 7 | 4508 | 36  | -10 | 19 | 5508 | -12 | -76 | 37 |
| 3509 | 15  | -25 | 7 | 4509 | -39 | -10 | 19 | 5509 | -18 | -76 | 37 |
| 3510 | -6  | -25 | 7 | 4510 | -45 | -10 | 19 | 5510 | -24 | -76 | 37 |
| 3511 | -12 | -25 | 7 | 4511 | 12  | -7  | 19 | 5511 | -30 | -76 | 37 |
| 3512 | -18 | -25 | 7 | 4512 | -12 | -7  | 19 | 5512 | -36 | -76 | 37 |
| 3513 | -48 | -25 | 7 | 4513 | -54 | -7  | 19 | 5513 | 36  | -70 | 37 |
| 3514 | -63 | -25 | 7 | 4514 | -60 | -7  | 19 | 5514 | 27  | -70 | 37 |
| 3515 | 66  | -22 | 7 | 4515 | 60  | -4  | 19 | 5515 | 21  | -70 | 37 |
| 3516 | 60  | -22 | 7 | 4516 | 54  | -4  | 19 | 5516 | 15  | -70 | 37 |
| 3517 | 54  | -22 | 7 | 4517 | 18  | -1  | 19 | 5517 | 9   | -70 | 37 |
| 3518 | 48  | -22 | 7 | 4518 | 12  | -1  | 19 | 5518 | 0   | -70 | 37 |
| 3519 | 42  | -22 | 7 | 4519 | -12 | -1  | 19 | 5519 | -6  | -70 | 37 |
| 3520 | -33 | -22 | 7 | 4520 | -54 | -1  | 19 | 5520 | -12 | -70 | 37 |
| 3521 | -39 | -22 | 7 | 4521 | 54  | 2   | 19 | 5521 | -18 | -70 | 37 |
| 3522 | 15  | -19 | 7 | 4522 | 15  | 5   | 19 | 5522 | -24 | -70 | 37 |
| 3523 | 6   | -19 | 7 | 4523 | -12 | 5   | 19 | 5523 | -30 | -70 | 37 |
| 3524 | 0   | -19 | 7 | 4524 | -18 | 5   | 19 | 5524 | -36 | -70 | 37 |
| 3525 | -6  | -19 | 7 | 4525 | -45 | 5   | 19 | 5525 | -42 | -70 | 37 |
| 3526 | -12 | -19 | 7 | 4526 | -54 | 5   | 19 | 5526 | 48  | -67 | 37 |
| 3527 | -48 | -19 | 7 | 4527 | 57  | 8   | 19 | 5527 | 36  | -64 | 37 |
| 3528 | -54 | -19 | 7 | 4528 | 48  | 11  | 19 | 5528 | 27  | -64 | 37 |
| 3529 | -60 | -19 | 7 | 4529 | 15  | 11  | 19 | 5529 | 15  | -64 | 37 |
| 3530 | 60  | -16 | 7 | 4530 | -45 | 11  | 19 | 5530 | 9   | -64 | 37 |
| 3531 | 54  | -16 | 7 | 4531 | -54 | 11  | 19 | 5531 | 3   | -64 | 37 |
| 3532 | 48  | -16 | 7 | 4532 | 54  | 17  | 19 | 5532 | -9  | -64 | 37 |
| 3533 | 42  | -16 | 7 | 4533 | 48  | 17  | 19 | 5533 | -24 | -64 | 37 |
| 3534 | -33 | -16 | 7 | 4534 | -48 | 17  | 19 | 5534 | -30 | -64 | 37 |
| 3535 | -39 | -16 | 7 | 4535 | -54 | 17  | 19 | 5535 | -36 | -64 | 37 |
| 3536 | 36  | -13 | 7 | 4536 | 54  | 23  | 19 | 5536 | -42 | -64 | 37 |
| 3537 | 30  | -13 | 7 | 4537 | 48  | 23  | 19 | 5537 | -48 | -64 | 37 |
| 3538 | 15  | -13 | 7 | 4538 | 42  | 23  | 19 | 5538 | 45  | -61 | 37 |
| 3539 | 6   | -13 | 7 | 4539 | 0   | 23  | 19 | 5539 | 54  | -58 | 37 |
| 3540 | 0   | -13 | 7 | 4540 | -42 | 23  | 19 | 5540 | 36  | -58 | 37 |
| 3541 | -6  | -13 | 7 | 4541 | -48 | 23  | 19 | 5541 | 9   | -58 | 37 |
| 3542 | -12 | -13 | 7 | 4542 | 48  | 29  | 19 | 5542 | 3   | -58 | 37 |
| 3543 | -27 | -13 | 7 | 4543 | 42  | 29  | 19 | 5543 | -3  | -58 | 37 |
| 3544 | -48 | -13 | 7 | 4544 | 6   | 29  | 19 | 5544 | -9  | -58 | 37 |
| 3545 | -54 | -13 | 7 | 4545 | 0   | 29  | 19 | 5545 | -42 | -58 | 37 |
| 3546 | -60 | -13 | 7 | 4546 | -6  | 29  | 19 | 5546 | -48 | -58 | 37 |
| 3547 | 60  | -10 | 7 | 4547 | -39 | 29  | 19 | 5547 | 45  | -55 | 37 |
| 3548 | 54  | -10 | 7 | 4548 | 12  | 35  | 19 | 5548 | 57  | -52 | 37 |

|      |     |     |   |      |     |     |    |      |     |     |    |
|------|-----|-----|---|------|-----|-----|----|------|-----|-----|----|
| 3549 | 48  | -10 | 7 | 4549 | 6   | 35  | 19 | 5549 | 9   | -52 | 37 |
| 3550 | 42  | -7  | 7 | 4550 | 0   | 35  | 19 | 5550 | 3   | -52 | 37 |
| 3551 | 36  | -7  | 7 | 4551 | -6  | 35  | 19 | 5551 | -3  | -52 | 37 |
| 3552 | 30  | -7  | 7 | 4552 | -12 | 35  | 19 | 5552 | -9  | -52 | 37 |
| 3553 | 12  | -7  | 7 | 4553 | -39 | 35  | 19 | 5553 | 51  | -49 | 37 |
| 3554 | 6   | -7  | 7 | 4554 | 48  | 38  | 19 | 5554 | 45  | -49 | 37 |
| 3555 | 0   | -7  | 7 | 4555 | 42  | 38  | 19 | 5555 | -51 | -49 | 37 |
| 3556 | -6  | -7  | 7 | 4556 | 36  | 38  | 19 | 5556 | 57  | -46 | 37 |
| 3557 | -12 | -7  | 7 | 4557 | 12  | 41  | 19 | 5557 | 9   | -46 | 37 |
| 3558 | -27 | -7  | 7 | 4558 | 6   | 41  | 19 | 5558 | 3   | -46 | 37 |
| 3559 | -36 | -7  | 7 | 4559 | 0   | 41  | 19 | 5559 | -3  | -46 | 37 |
| 3560 | -42 | -7  | 7 | 4560 | -33 | 41  | 19 | 5560 | -9  | -46 | 37 |
| 3561 | -48 | -7  | 7 | 4561 | 30  | 44  | 19 | 5561 | 51  | -43 | 37 |
| 3562 | -54 | -7  | 7 | 4562 | -6  | 44  | 19 | 5562 | 45  | -43 | 37 |
| 3563 | 60  | -4  | 7 | 4563 | -12 | 44  | 19 | 5563 | -51 | -43 | 37 |
| 3564 | 54  | -4  | 7 | 4564 | 39  | 47  | 19 | 5564 | -57 | -43 | 37 |
| 3565 | 48  | -1  | 7 | 4565 | 12  | 47  | 19 | 5565 | 15  | -40 | 37 |
| 3566 | 42  | -1  | 7 | 4566 | 6   | 47  | 19 | 5566 | 9   | -40 | 37 |
| 3567 | 36  | -1  | 7 | 4567 | -27 | 47  | 19 | 5567 | 3   | -40 | 37 |
| 3568 | 30  | -1  | 7 | 4568 | -33 | 47  | 19 | 5568 | -3  | -40 | 37 |
| 3569 | -6  | -1  | 7 | 4569 | 30  | 50  | 19 | 5569 | -9  | -40 | 37 |
| 3570 | -30 | -1  | 7 | 4570 | 24  | 50  | 19 | 5570 | 60  | -37 | 37 |
| 3571 | -36 | -1  | 7 | 4571 | 3   | 53  | 19 | 5571 | 51  | -37 | 37 |
| 3572 | -42 | -1  | 7 | 4572 | -3  | 53  | 19 | 5572 | -51 | -37 | 37 |
| 3573 | -48 | -1  | 7 | 4573 | -9  | 53  | 19 | 5573 | 9   | -34 | 37 |
| 3574 | -54 | -1  | 7 | 4574 | -21 | 53  | 19 | 5574 | 3   | -34 | 37 |
| 3575 | -21 | 2   | 7 | 4575 | -27 | 53  | 19 | 5575 | -3  | -34 | 37 |
| 3576 | 54  | 5   | 7 | 4576 | 30  | 56  | 19 | 5576 | -9  | -34 | 37 |
| 3577 | 48  | 5   | 7 | 4577 | 24  | 56  | 19 | 5577 | 60  | -31 | 37 |
| 3578 | 42  | 5   | 7 | 4578 | 18  | 56  | 19 | 5578 | 51  | -31 | 37 |
| 3579 | 36  | 5   | 7 | 4579 | 9   | 59  | 19 | 5579 | -48 | -31 | 37 |
| 3580 | 27  | 5   | 7 | 4580 | 3   | 59  | 19 | 5580 | 12  | -28 | 37 |
| 3581 | 21  | 5   | 7 | 4581 | -3  | 59  | 19 | 5581 | 3   | -28 | 37 |
| 3582 | -30 | 5   | 7 | 4582 | -9  | 59  | 19 | 5582 | -3  | -28 | 37 |
| 3583 | -36 | 5   | 7 | 4583 | -15 | 59  | 19 | 5583 | -9  | -28 | 37 |
| 3584 | -42 | 5   | 7 | 4584 | 24  | 62  | 19 | 5584 | -57 | -28 | 37 |
| 3585 | -48 | 5   | 7 | 4585 | 18  | 62  | 19 | 5585 | 60  | -25 | 37 |
| 3586 | -54 | 5   | 7 | 4586 | 15  | -91 | 22 | 5586 | 54  | -25 | 37 |
| 3587 | 12  | 8   | 7 | 4587 | -12 | -91 | 22 | 5587 | 48  | -25 | 37 |
| 3588 | -12 | 8   | 7 | 4588 | -21 | -91 | 22 | 5588 | 12  | -22 | 37 |
| 3589 | -21 | 8   | 7 | 4589 | 27  | -88 | 22 | 5589 | 6   | -22 | 37 |
| 3590 | 54  | 11  | 7 | 4590 | 0   | -88 | 22 | 5590 | -6  | -22 | 37 |
| 3591 | 48  | 11  | 7 | 4591 | 15  | -85 | 22 | 5591 | -12 | -22 | 37 |
| 3592 | 42  | 11  | 7 | 4592 | 9   | -85 | 22 | 5592 | -45 | -22 | 37 |
| 3593 | 33  | 11  | 7 | 4593 | -21 | -85 | 22 | 5593 | -57 | -22 | 37 |
| 3594 | 27  | 11  | 7 | 4594 | -27 | -85 | 22 | 5594 | 60  | -19 | 37 |
| 3595 | 21  | 11  | 7 | 4595 | -33 | -85 | 22 | 5595 | 45  | -19 | 37 |

|      |     |    |   |      |     |     |    |      |     |     |    |
|------|-----|----|---|------|-----|-----|----|------|-----|-----|----|
| 3596 | -42 | 11 | 7 | 4596 | 39  | -82 | 22 | 5596 | 9   | -16 | 37 |
| 3597 | -48 | 11 | 7 | 4597 | 33  | -82 | 22 | 5597 | 0   | -16 | 37 |
| 3598 | -54 | 11 | 7 | 4598 | 27  | -82 | 22 | 5598 | -6  | -16 | 37 |
| 3599 | -12 | 14 | 7 | 4599 | 0   | -82 | 22 | 5599 | -42 | -16 | 37 |
| 3600 | -18 | 14 | 7 | 4600 | -9  | -82 | 22 | 5600 | -51 | -16 | 37 |
| 3601 | -27 | 14 | 7 | 4601 | 9   | -79 | 22 | 5601 | -57 | -16 | 37 |
| 3602 | -33 | 14 | 7 | 4602 | -27 | -79 | 22 | 5602 | 57  | -13 | 37 |
| 3603 | 54  | 17 | 7 | 4603 | -33 | -79 | 22 | 5603 | 51  | -13 | 37 |
| 3604 | 48  | 17 | 7 | 4604 | -39 | -79 | 22 | 5604 | 45  | -13 | 37 |
| 3605 | 42  | 17 | 7 | 4605 | 33  | -76 | 22 | 5605 | 9   | -10 | 37 |
| 3606 | 33  | 17 | 7 | 4606 | 0   | -76 | 22 | 5606 | 0   | -10 | 37 |
| 3607 | 27  | 17 | 7 | 4607 | -6  | -76 | 22 | 5607 | -9  | -10 | 37 |
| 3608 | 21  | 17 | 7 | 4608 | -12 | -76 | 22 | 5608 | -48 | -10 | 37 |
| 3609 | 15  | 17 | 7 | 4609 | 48  | -73 | 22 | 5609 | -57 | -10 | 37 |
| 3610 | 9   | 17 | 7 | 4610 | 42  | -73 | 22 | 5610 | 57  | -7  | 37 |
| 3611 | -9  | 20 | 7 | 4611 | 18  | -73 | 22 | 5611 | 51  | -7  | 37 |
| 3612 | -33 | 20 | 7 | 4612 | 9   | -73 | 22 | 5612 | 45  | -7  | 37 |
| 3613 | -39 | 20 | 7 | 4613 | -39 | -73 | 22 | 5613 | 9   | -4  | 37 |
| 3614 | -45 | 20 | 7 | 4614 | -6  | -70 | 22 | 5614 | 0   | -4  | 37 |
| 3615 | -51 | 20 | 7 | 4615 | -21 | -70 | 22 | 5615 | -9  | -4  | 37 |
| 3616 | 54  | 23 | 7 | 4616 | -48 | -70 | 22 | 5616 | -45 | -4  | 37 |
| 3617 | 48  | 23 | 7 | 4617 | 51  | -67 | 22 | 5617 | -54 | -4  | 37 |
| 3618 | 42  | 23 | 7 | 4618 | 42  | -67 | 22 | 5618 | 57  | -1  | 37 |
| 3619 | 33  | 23 | 7 | 4619 | 18  | -67 | 22 | 5619 | 51  | -1  | 37 |
| 3620 | 15  | 23 | 7 | 4620 | 12  | -67 | 22 | 5620 | 45  | -1  | 37 |
| 3621 | -33 | 26 | 7 | 4621 | 3   | -67 | 22 | 5621 | 9   | 2   | 37 |
| 3622 | -39 | 26 | 7 | 4622 | -15 | -64 | 22 | 5622 | 0   | 2   | 37 |
| 3623 | -45 | 26 | 7 | 4623 | -21 | -64 | 22 | 5623 | -9  | 2   | 37 |
| 3624 | -51 | 26 | 7 | 4624 | -42 | -64 | 22 | 5624 | -39 | 2   | 37 |
| 3625 | 48  | 29 | 7 | 4625 | -48 | -64 | 22 | 5625 | -45 | 2   | 37 |
| 3626 | 39  | 29 | 7 | 4626 | -54 | -64 | 22 | 5626 | -54 | 2   | 37 |
| 3627 | 33  | 29 | 7 | 4627 | 42  | -61 | 22 | 5627 | 45  | 5   | 37 |
| 3628 | -42 | 32 | 7 | 4628 | 24  | -61 | 22 | 5628 | 39  | 5   | 37 |
| 3629 | 45  | 35 | 7 | 4629 | 18  | -61 | 22 | 5629 | 6   | 8   | 37 |
| 3630 | 6   | 35 | 7 | 4630 | 12  | -61 | 22 | 5630 | 0   | 8   | 37 |
| 3631 | 0   | 35 | 7 | 4631 | 6   | -61 | 22 | 5631 | -6  | 8   | 37 |
| 3632 | -42 | 38 | 7 | 4632 | -3  | -61 | 22 | 5632 | -12 | 8   | 37 |
| 3633 | -48 | 38 | 7 | 4633 | 48  | -58 | 22 | 5633 | 48  | 11  | 37 |
| 3634 | 45  | 41 | 7 | 4634 | -9  | -58 | 22 | 5634 | 36  | 11  | 37 |
| 3635 | 39  | 41 | 7 | 4635 | -15 | -58 | 22 | 5635 | -39 | 11  | 37 |
| 3636 | 12  | 41 | 7 | 4636 | -42 | -58 | 22 | 5636 | -45 | 11  | 37 |
| 3637 | 6   | 41 | 7 | 4637 | 18  | -55 | 22 | 5637 | 6   | 14  | 37 |
| 3638 | 0   | 41 | 7 | 4638 | 12  | -55 | 22 | 5638 | 0   | 14  | 37 |
| 3639 | -9  | 41 | 7 | 4639 | 6   | -55 | 22 | 5639 | -6  | 14  | 37 |
| 3640 | -39 | 44 | 7 | 4640 | 0   | -55 | 22 | 5640 | -12 | 14  | 37 |
| 3641 | 45  | 47 | 7 | 4641 | -51 | -55 | 22 | 5641 | 42  | 17  | 37 |
| 3642 | 39  | 47 | 7 | 4642 | -57 | -55 | 22 | 5642 | 36  | 17  | 37 |

|      |     |     |    |      |     |     |    |      |     |     |    |
|------|-----|-----|----|------|-----|-----|----|------|-----|-----|----|
| 3643 | 12  | 47  | 7  | 4643 | 48  | -52 | 22 | 5643 | -48 | 17  | 37 |
| 3644 | 6   | 47  | 7  | 4644 | -9  | -52 | 22 | 5644 | 9   | 20  | 37 |
| 3645 | -3  | 47  | 7  | 4645 | 60  | -49 | 22 | 5645 | 3   | 20  | 37 |
| 3646 | -9  | 47  | 7  | 4646 | 6   | -49 | 22 | 5646 | 42  | 23  | 37 |
| 3647 | 30  | 50  | 7  | 4647 | -45 | -49 | 22 | 5647 | 36  | 23  | 37 |
| 3648 | -30 | 50  | 7  | 4648 | -51 | -49 | 22 | 5648 | -9  | 23  | 37 |
| 3649 | -39 | 50  | 7  | 4649 | -57 | -49 | 22 | 5649 | -27 | 23  | 37 |
| 3650 | 39  | 53  | 7  | 4650 | 48  | -46 | 22 | 5650 | -33 | 23  | 37 |
| 3651 | 12  | 53  | 7  | 4651 | -3  | -46 | 22 | 5651 | -42 | 23  | 37 |
| 3652 | 3   | 53  | 7  | 4652 | 6   | -43 | 22 | 5652 | 24  | 26  | 37 |
| 3653 | -3  | 53  | 7  | 4653 | -51 | -43 | 22 | 5653 | 42  | 29  | 37 |
| 3654 | -9  | 53  | 7  | 4654 | 60  | -40 | 22 | 5654 | 36  | 29  | 37 |
| 3655 | -24 | 56  | 7  | 4655 | 54  | -40 | 22 | 5655 | 6   | 29  | 37 |
| 3656 | -30 | 56  | 7  | 4656 | 48  | -40 | 22 | 5656 | 0   | 29  | 37 |
| 3657 | 33  | 59  | 7  | 4657 | -3  | -40 | 22 | 5657 | -6  | 29  | 37 |
| 3658 | 27  | 59  | 7  | 4658 | -42 | -37 | 22 | 5658 | -21 | 29  | 37 |
| 3659 | 21  | 59  | 7  | 4659 | -48 | -37 | 22 | 5659 | -27 | 29  | 37 |
| 3660 | 9   | 59  | 7  | 4660 | -57 | -37 | 22 | 5660 | -33 | 29  | 37 |
| 3661 | 3   | 59  | 7  | 4661 | 63  | -34 | 22 | 5661 | -39 | 29  | 37 |
| 3662 | -3  | 59  | 7  | 4662 | 54  | -34 | 22 | 5662 | 24  | 32  | 37 |
| 3663 | -9  | 59  | 7  | 4663 | 48  | -34 | 22 | 5663 | 36  | 35  | 37 |
| 3664 | -18 | 62  | 7  | 4664 | -36 | -31 | 22 | 5664 | -27 | 35  | 37 |
| 3665 | -24 | 62  | 7  | 4665 | -42 | -31 | 22 | 5665 | -33 | 35  | 37 |
| 3666 | 21  | 65  | 7  | 4666 | -48 | -31 | 22 | 5666 | 30  | 38  | 37 |
| 3667 | 15  | 65  | 7  | 4667 | -54 | -31 | 22 | 5667 | 24  | 38  | 37 |
| 3668 | 9   | 65  | 7  | 4668 | 63  | -28 | 22 | 5668 | 9   | 38  | 37 |
| 3669 | -9  | 65  | 7  | 4669 | 54  | -28 | 22 | 5669 | 3   | 38  | 37 |
| 3670 | -21 | -97 | 10 | 4670 | 48  | -28 | 22 | 5670 | -3  | 38  | 37 |
| 3671 | 21  | -94 | 10 | 4671 | 42  | -28 | 22 | 5671 | -9  | 38  | 37 |
| 3672 | -3  | -94 | 10 | 4672 | -36 | -25 | 22 | 5672 | -18 | 38  | 37 |
| 3673 | -9  | -94 | 10 | 4673 | -42 | -25 | 22 | 5673 | -27 | 41  | 37 |
| 3674 | 30  | -91 | 10 | 4674 | -48 | -25 | 22 | 5674 | 30  | 44  | 37 |
| 3675 | 15  | -91 | 10 | 4675 | -54 | -25 | 22 | 5675 | 24  | 44  | 37 |
| 3676 | 6   | -91 | 10 | 4676 | 63  | -22 | 22 | 5676 | 18  | 44  | 37 |
| 3677 | -27 | -91 | 10 | 4677 | 54  | -22 | 22 | 5677 | -18 | 44  | 37 |
| 3678 | -3  | -88 | 10 | 4678 | 48  | -22 | 22 | 5678 | 6   | 47  | 37 |
| 3679 | -9  | -88 | 10 | 4679 | 42  | -22 | 22 | 5679 | 0   | 47  | 37 |
| 3680 | -36 | -88 | 10 | 4680 | 36  | -22 | 22 | 5680 | -6  | 47  | 37 |
| 3681 | 15  | -85 | 10 | 4681 | -36 | -19 | 22 | 5681 | 24  | 50  | 37 |
| 3682 | 9   | -85 | 10 | 4682 | -42 | -19 | 22 | 5682 | 18  | 50  | 37 |
| 3683 | 42  | -82 | 10 | 4683 | -48 | -19 | 22 | 5683 | -12 | 50  | 37 |
| 3684 | -9  | -82 | 10 | 4684 | -54 | -19 | 22 | 5684 | -18 | 50  | 37 |
| 3685 | -36 | -82 | 10 | 4685 | -60 | -19 | 22 | 5685 | 6   | 53  | 37 |
| 3686 | -42 | -82 | 10 | 4686 | 54  | -16 | 22 | 5686 | 0   | 53  | 37 |
| 3687 | 15  | -79 | 10 | 4687 | 48  | -16 | 22 | 5687 | 30  | -79 | 40 |
| 3688 | 9   | -79 | 10 | 4688 | 42  | -16 | 22 | 5688 | 24  | -79 | 40 |
| 3689 | 3   | -79 | 10 | 4689 | 36  | -16 | 22 | 5689 | 18  | -79 | 40 |

|      |     |     |    |      |     |     |    |      |     |     |    |
|------|-----|-----|----|------|-----|-----|----|------|-----|-----|----|
| 3690 | -3  | -79 | 10 | 4690 | 63  | -13 | 22 | 5690 | 12  | -79 | 40 |
| 3691 | 39  | -76 | 10 | 4691 | -54 | -13 | 22 | 5691 | 6   | -79 | 40 |
| 3692 | -12 | -76 | 10 | 4692 | 63  | -7  | 22 | 5692 | -3  | -79 | 40 |
| 3693 | -42 | -76 | 10 | 4693 | 57  | -7  | 22 | 5693 | -9  | -79 | 40 |
| 3694 | -48 | -76 | 10 | 4694 | 15  | -4  | 22 | 5694 | -15 | -79 | 40 |
| 3695 | 48  | -73 | 10 | 4695 | -15 | -4  | 22 | 5695 | -21 | -79 | 40 |
| 3696 | 18  | -73 | 10 | 4696 | -57 | -4  | 22 | 5696 | -27 | -79 | 40 |
| 3697 | 9   | -73 | 10 | 4697 | 57  | -1  | 22 | 5697 | 39  | -73 | 40 |
| 3698 | 3   | -73 | 10 | 4698 | -15 | 2   | 22 | 5698 | 30  | -73 | 40 |
| 3699 | -12 | -70 | 10 | 4699 | -48 | 2   | 22 | 5699 | 24  | -73 | 40 |
| 3700 | -21 | -70 | 10 | 4700 | -57 | 2   | 22 | 5700 | 18  | -73 | 40 |
| 3701 | 48  | -67 | 10 | 4701 | 60  | 5   | 22 | 5701 | 12  | -73 | 40 |
| 3702 | 42  | -67 | 10 | 4702 | 51  | 5   | 22 | 5702 | 6   | -73 | 40 |
| 3703 | 24  | -67 | 10 | 4703 | 45  | 8   | 22 | 5703 | -3  | -73 | 40 |
| 3704 | 18  | -67 | 10 | 4704 | -42 | 8   | 22 | 5704 | -9  | -73 | 40 |
| 3705 | 12  | -67 | 10 | 4705 | -48 | 8   | 22 | 5705 | -15 | -73 | 40 |
| 3706 | 3   | -67 | 10 | 4706 | 54  | 11  | 22 | 5706 | -21 | -73 | 40 |
| 3707 | -6  | -67 | 10 | 4707 | 45  | 14  | 22 | 5707 | -27 | -73 | 40 |
| 3708 | -45 | -67 | 10 | 4708 | -42 | 14  | 22 | 5708 | -33 | -73 | 40 |
| 3709 | -51 | -67 | 10 | 4709 | -51 | 14  | 22 | 5709 | -39 | -73 | 40 |
| 3710 | 54  | -64 | 10 | 4710 | 39  | 17  | 22 | 5710 | 42  | -67 | 40 |
| 3711 | -15 | -64 | 10 | 4711 | 3   | 17  | 22 | 5711 | 33  | -67 | 40 |
| 3712 | -21 | -64 | 10 | 4712 | -3  | 17  | 22 | 5712 | 24  | -67 | 40 |
| 3713 | 42  | -61 | 10 | 4713 | 51  | 20  | 22 | 5713 | 18  | -67 | 40 |
| 3714 | 24  | -61 | 10 | 4714 | 45  | 20  | 22 | 5714 | 12  | -67 | 40 |
| 3715 | 18  | -61 | 10 | 4715 | -39 | 20  | 22 | 5715 | 6   | -67 | 40 |
| 3716 | -45 | -61 | 10 | 4716 | -45 | 20  | 22 | 5716 | -3  | -67 | 40 |
| 3717 | -51 | -61 | 10 | 4717 | -51 | 20  | 22 | 5717 | -15 | -67 | 40 |
| 3718 | 48  | -58 | 10 | 4718 | 6   | 23  | 22 | 5718 | -21 | -67 | 40 |
| 3719 | 9   | -58 | 10 | 4719 | -6  | 23  | 22 | 5719 | -27 | -67 | 40 |
| 3720 | 3   | -58 | 10 | 4720 | 51  | 26  | 22 | 5720 | -33 | -67 | 40 |
| 3721 | -3  | -58 | 10 | 4721 | 45  | 26  | 22 | 5721 | -39 | -67 | 40 |
| 3722 | -9  | -58 | 10 | 4722 | 39  | 26  | 22 | 5722 | -45 | -67 | 40 |
| 3723 | -15 | -58 | 10 | 4723 | -45 | 26  | 22 | 5723 | 51  | -61 | 40 |
| 3724 | 60  | -55 | 10 | 4724 | -51 | 26  | 22 | 5724 | 39  | -61 | 40 |
| 3725 | 24  | -55 | 10 | 4725 | 51  | 32  | 22 | 5725 | 33  | -61 | 40 |
| 3726 | 18  | -55 | 10 | 4726 | 45  | 32  | 22 | 5726 | 12  | -61 | 40 |
| 3727 | -21 | -55 | 10 | 4727 | 39  | 32  | 22 | 5727 | 6   | -61 | 40 |
| 3728 | -45 | -55 | 10 | 4728 | 9   | 32  | 22 | 5728 | 0   | -61 | 40 |
| 3729 | -54 | -55 | 10 | 4729 | 3   | 32  | 22 | 5729 | -6  | -61 | 40 |
| 3730 | 48  | -52 | 10 | 4730 | -3  | 32  | 22 | 5730 | -12 | -61 | 40 |
| 3731 | 9   | -52 | 10 | 4731 | -9  | 32  | 22 | 5731 | -27 | -61 | 40 |
| 3732 | 3   | -52 | 10 | 4732 | -42 | 32  | 22 | 5732 | -33 | -61 | 40 |
| 3733 | -3  | -52 | 10 | 4733 | -48 | 32  | 22 | 5733 | -39 | -61 | 40 |
| 3734 | -9  | -52 | 10 | 4734 | 9   | 38  | 22 | 5734 | -45 | -61 | 40 |
| 3735 | 60  | -49 | 10 | 4735 | 3   | 38  | 22 | 5735 | 51  | -55 | 40 |
| 3736 | 18  | -49 | 10 | 4736 | -3  | 38  | 22 | 5736 | 39  | -55 | 40 |

|      |     |     |    |      |     |     |    |      |     |     |    |
|------|-----|-----|----|------|-----|-----|----|------|-----|-----|----|
| 3737 | -54 | -49 | 10 | 4737 | -9  | 38  | 22 | 5737 | 33  | -55 | 40 |
| 3738 | -60 | -49 | 10 | 4738 | -30 | 38  | 22 | 5738 | 12  | -55 | 40 |
| 3739 | 48  | -46 | 10 | 4739 | -36 | 38  | 22 | 5739 | 6   | -55 | 40 |
| 3740 | 9   | -46 | 10 | 4740 | -42 | 38  | 22 | 5740 | 0   | -55 | 40 |
| 3741 | 3   | -46 | 10 | 4741 | 45  | 41  | 22 | 5741 | -6  | -55 | 40 |
| 3742 | -3  | -46 | 10 | 4742 | 39  | 41  | 22 | 5742 | -12 | -55 | 40 |
| 3743 | -9  | -46 | 10 | 4743 | 33  | 41  | 22 | 5743 | -30 | -55 | 40 |
| 3744 | -51 | -43 | 10 | 4744 | 27  | 41  | 22 | 5744 | -36 | -55 | 40 |
| 3745 | 54  | -40 | 10 | 4745 | 9   | 44  | 22 | 5745 | -45 | -55 | 40 |
| 3746 | 48  | -40 | 10 | 4746 | 3   | 44  | 22 | 5746 | -51 | -55 | 40 |
| 3747 | 63  | -37 | 10 | 4747 | -24 | 44  | 22 | 5747 | 39  | -49 | 40 |
| 3748 | -51 | -37 | 10 | 4748 | -30 | 44  | 22 | 5748 | 33  | -49 | 40 |
| 3749 | -57 | -37 | 10 | 4749 | -36 | 44  | 22 | 5749 | 12  | -49 | 40 |
| 3750 | -63 | -37 | 10 | 4750 | 33  | 47  | 22 | 5750 | 6   | -49 | 40 |
| 3751 | 54  | -34 | 10 | 4751 | 27  | 47  | 22 | 5751 | 0   | -49 | 40 |
| 3752 | 48  | -34 | 10 | 4752 | -3  | 47  | 22 | 5752 | -6  | -49 | 40 |
| 3753 | 21  | -34 | 10 | 4753 | -9  | 47  | 22 | 5753 | -12 | -49 | 40 |
| 3754 | 15  | -34 | 10 | 4754 | 9   | 50  | 22 | 5754 | -30 | -49 | 40 |
| 3755 | -15 | -34 | 10 | 4755 | -24 | 50  | 22 | 5755 | -36 | -49 | 40 |
| 3756 | -21 | -34 | 10 | 4756 | -30 | 50  | 22 | 5756 | -42 | -49 | 40 |
| 3757 | 63  | -31 | 10 | 4757 | -36 | 50  | 22 | 5757 | 48  | -46 | 40 |
| 3758 | 9   | -31 | 10 | 4758 | 36  | 53  | 22 | 5758 | -48 | -46 | 40 |
| 3759 | -42 | -31 | 10 | 4759 | 27  | 53  | 22 | 5759 | -54 | -46 | 40 |
| 3760 | -48 | -31 | 10 | 4760 | 21  | 53  | 22 | 5760 | 39  | -43 | 40 |
| 3761 | -57 | -31 | 10 | 4761 | 12  | 56  | 22 | 5761 | 33  | -43 | 40 |
| 3762 | -63 | -31 | 10 | 4762 | 6   | 56  | 22 | 5762 | 12  | -43 | 40 |
| 3763 | 42  | -28 | 10 | 4763 | 0   | 56  | 22 | 5763 | 6   | -43 | 40 |
| 3764 | 21  | -28 | 10 | 4764 | -6  | 56  | 22 | 5764 | 0   | -43 | 40 |
| 3765 | -9  | -28 | 10 | 4765 | -12 | 56  | 22 | 5765 | -6  | -43 | 40 |
| 3766 | -15 | -28 | 10 | 4766 | -18 | 56  | 22 | 5766 | -12 | -43 | 40 |
| 3767 | -21 | -28 | 10 | 4767 | -24 | 56  | 22 | 5767 | -33 | -43 | 40 |
| 3768 | 63  | -25 | 10 | 4768 | -30 | 56  | 22 | 5768 | -39 | -43 | 40 |
| 3769 | 57  | -25 | 10 | 4769 | 27  | 59  | 22 | 5769 | 57  | -40 | 40 |
| 3770 | 51  | -25 | 10 | 4770 | 21  | 59  | 22 | 5770 | 48  | -40 | 40 |
| 3771 | 36  | -25 | 10 | 4771 | 12  | 62  | 22 | 5771 | -45 | -40 | 40 |
| 3772 | 9   | -25 | 10 | 4772 | 6   | 62  | 22 | 5772 | -54 | -40 | 40 |
| 3773 | -36 | -25 | 10 | 4773 | -6  | 62  | 22 | 5773 | 42  | -37 | 40 |
| 3774 | -42 | -25 | 10 | 4774 | -12 | 62  | 22 | 5774 | 36  | -37 | 40 |
| 3775 | -57 | -25 | 10 | 4775 | -18 | 62  | 22 | 5775 | 12  | -37 | 40 |
| 3776 | 18  | -22 | 10 | 4776 | 21  | -88 | 25 | 5776 | 6   | -37 | 40 |
| 3777 | 3   | -22 | 10 | 4777 | 12  | -88 | 25 | 5777 | 0   | -37 | 40 |
| 3778 | -3  | -22 | 10 | 4778 | 6   | -88 | 25 | 5778 | -6  | -37 | 40 |
| 3779 | -9  | -22 | 10 | 4779 | -6  | -88 | 25 | 5779 | -12 | -37 | 40 |
| 3780 | -15 | -22 | 10 | 4780 | -15 | -88 | 25 | 5780 | -36 | -37 | 40 |
| 3781 | -51 | -22 | 10 | 4781 | -24 | -88 | 25 | 5781 | 57  | -34 | 40 |
| 3782 | 63  | -19 | 10 | 4782 | 30  | -85 | 25 | 5782 | 48  | -34 | 40 |
| 3783 | 57  | -19 | 10 | 4783 | 12  | -82 | 25 | 5783 | -42 | -34 | 40 |

|      |     |     |    |      |     |     |    |      |     |     |    |
|------|-----|-----|----|------|-----|-----|----|------|-----|-----|----|
| 3784 | 51  | -19 | 10 | 4784 | 6   | -82 | 25 | 5784 | -54 | -34 | 40 |
| 3785 | 45  | -19 | 10 | 4785 | -24 | -82 | 25 | 5785 | 42  | -31 | 40 |
| 3786 | 39  | -19 | 10 | 4786 | -30 | -82 | 25 | 5786 | 36  | -31 | 40 |
| 3787 | 33  | -19 | 10 | 4787 | -36 | -82 | 25 | 5787 | 15  | -31 | 40 |
| 3788 | -36 | -19 | 10 | 4788 | 36  | -79 | 25 | 5788 | 6   | -31 | 40 |
| 3789 | -42 | -19 | 10 | 4789 | 30  | -79 | 25 | 5789 | 0   | -31 | 40 |
| 3790 | 12  | -16 | 10 | 4790 | -3  | -79 | 25 | 5790 | -6  | -31 | 40 |
| 3791 | 3   | -16 | 10 | 4791 | -15 | -79 | 25 | 5791 | -12 | -31 | 40 |
| 3792 | -3  | -16 | 10 | 4792 | 15  | -76 | 25 | 5792 | 57  | -28 | 40 |
| 3793 | -9  | -16 | 10 | 4793 | 6   | -76 | 25 | 5793 | -42 | -28 | 40 |
| 3794 | -15 | -16 | 10 | 4794 | -24 | -76 | 25 | 5794 | -51 | -28 | 40 |
| 3795 | -51 | -16 | 10 | 4795 | -30 | -76 | 25 | 5795 | 42  | -25 | 40 |
| 3796 | -57 | -16 | 10 | 4796 | -36 | -76 | 25 | 5796 | 15  | -25 | 40 |
| 3797 | 63  | -13 | 10 | 4797 | -42 | -76 | 25 | 5797 | 9   | -25 | 40 |
| 3798 | 57  | -13 | 10 | 4798 | 36  | -73 | 25 | 5798 | 0   | -25 | 40 |
| 3799 | 51  | -13 | 10 | 4799 | 30  | -73 | 25 | 5799 | -15 | -25 | 40 |
| 3800 | 45  | -13 | 10 | 4800 | -3  | -73 | 25 | 5800 | 57  | -22 | 40 |
| 3801 | -36 | -13 | 10 | 4801 | -9  | -73 | 25 | 5801 | 51  | -22 | 40 |
| 3802 | -42 | -13 | 10 | 4802 | -15 | -73 | 25 | 5802 | -51 | -22 | 40 |
| 3803 | 39  | -10 | 10 | 4803 | 45  | -70 | 25 | 5803 | 15  | -19 | 40 |
| 3804 | 33  | -10 | 10 | 4804 | 21  | -70 | 25 | 5804 | 3   | -19 | 40 |
| 3805 | 9   | -10 | 10 | 4805 | 15  | -70 | 25 | 5805 | -3  | -19 | 40 |
| 3806 | 3   | -10 | 10 | 4806 | 6   | -70 | 25 | 5806 | -9  | -19 | 40 |
| 3807 | -3  | -10 | 10 | 4807 | -42 | -70 | 25 | 5807 | -39 | -19 | 40 |
| 3808 | -9  | -10 | 10 | 4808 | -3  | -67 | 25 | 5808 | 54  | -16 | 40 |
| 3809 | -15 | -10 | 10 | 4809 | -9  | -67 | 25 | 5809 | 48  | -16 | 40 |
| 3810 | -30 | -10 | 10 | 4810 | -18 | -67 | 25 | 5810 | 42  | -16 | 40 |
| 3811 | -51 | -10 | 10 | 4811 | -51 | -67 | 25 | 5811 | 12  | -13 | 40 |
| 3812 | -57 | -10 | 10 | 4812 | 54  | -64 | 25 | 5812 | 6   | -13 | 40 |
| 3813 | 63  | -7  | 10 | 4813 | 48  | -64 | 25 | 5813 | -3  | -13 | 40 |
| 3814 | 57  | -7  | 10 | 4814 | 21  | -64 | 25 | 5814 | -12 | -13 | 40 |
| 3815 | 51  | -7  | 10 | 4815 | 15  | -64 | 25 | 5815 | -45 | -13 | 40 |
| 3816 | 45  | -4  | 10 | 4816 | 9   | -64 | 25 | 5816 | -54 | -13 | 40 |
| 3817 | 39  | -4  | 10 | 4817 | -12 | -61 | 25 | 5817 | 54  | -10 | 40 |
| 3818 | 33  | -4  | 10 | 4818 | -18 | -61 | 25 | 5818 | 48  | -10 | 40 |
| 3819 | 27  | -4  | 10 | 4819 | -45 | -61 | 25 | 5819 | 42  | -10 | 40 |
| 3820 | 9   | -4  | 10 | 4820 | -51 | -61 | 25 | 5820 | 12  | -7  | 40 |
| 3821 | 3   | -4  | 10 | 4821 | 57  | -58 | 25 | 5821 | 6   | -7  | 40 |
| 3822 | -3  | -4  | 10 | 4822 | 21  | -58 | 25 | 5822 | -3  | -7  | 40 |
| 3823 | -9  | -4  | 10 | 4823 | 15  | -58 | 25 | 5823 | -12 | -7  | 40 |
| 3824 | -24 | -4  | 10 | 4824 | 9   | -58 | 25 | 5824 | -51 | -7  | 40 |
| 3825 | -33 | -4  | 10 | 4825 | 3   | -58 | 25 | 5825 | 54  | -4  | 40 |
| 3826 | -39 | -4  | 10 | 4826 | 51  | -55 | 25 | 5826 | 48  | -4  | 40 |
| 3827 | -45 | -4  | 10 | 4827 | 45  | -55 | 25 | 5827 | 6   | -1  | 40 |
| 3828 | -51 | -4  | 10 | 4828 | -6  | -55 | 25 | 5828 | -3  | -1  | 40 |
| 3829 | -57 | -4  | 10 | 4829 | -12 | -55 | 25 | 5829 | -42 | -1  | 40 |
| 3830 | 57  | -1  | 10 | 4830 | -45 | -55 | 25 | 5830 | -48 | -1  | 40 |

|      |     |    |    |      |     |     |    |      |     |    |    |
|------|-----|----|----|------|-----|-----|----|------|-----|----|----|
| 3831 | 51  | 2  | 10 | 4831 | 57  | -52 | 25 | 5831 | 54  | 2  | 40 |
| 3832 | 45  | 2  | 10 | 4832 | 9   | -52 | 25 | 5832 | 48  | 2  | 40 |
| 3833 | 39  | 2  | 10 | 4833 | 3   | -52 | 25 | 5833 | 42  | 2  | 40 |
| 3834 | 33  | 2  | 10 | 4834 | -54 | -52 | 25 | 5834 | 12  | 5  | 40 |
| 3835 | 24  | 2  | 10 | 4835 | 51  | -49 | 25 | 5835 | 3   | 5  | 40 |
| 3836 | 9   | 2  | 10 | 4836 | 45  | -49 | 25 | 5836 | -3  | 5  | 40 |
| 3837 | 3   | 2  | 10 | 4837 | -6  | -49 | 25 | 5837 | -42 | 5  | 40 |
| 3838 | -9  | 2  | 10 | 4838 | 57  | -46 | 25 | 5838 | -48 | 5  | 40 |
| 3839 | -27 | 2  | 10 | 4839 | 9   | -46 | 25 | 5839 | 51  | 8  | 40 |
| 3840 | -33 | 2  | 10 | 4840 | 3   | -46 | 25 | 5840 | 42  | 8  | 40 |
| 3841 | -39 | 2  | 10 | 4841 | -48 | -46 | 25 | 5841 | 12  | 11 | 40 |
| 3842 | -45 | 2  | 10 | 4842 | -54 | -46 | 25 | 5842 | 3   | 11 | 40 |
| 3843 | -51 | 2  | 10 | 4843 | -60 | -46 | 25 | 5843 | -3  | 11 | 40 |
| 3844 | -57 | 2  | 10 | 4844 | 51  | -43 | 25 | 5844 | -9  | 11 | 40 |
| 3845 | 60  | 5  | 10 | 4845 | -6  | -43 | 25 | 5845 | 45  | 14 | 40 |
| 3846 | 51  | 8  | 10 | 4846 | 3   | -40 | 25 | 5846 | 39  | 14 | 40 |
| 3847 | 45  | 8  | 10 | 4847 | -45 | -40 | 25 | 5847 | -42 | 14 | 40 |
| 3848 | 39  | 8  | 10 | 4848 | -54 | -40 | 25 | 5848 | 12  | 17 | 40 |
| 3849 | 30  | 8  | 10 | 4849 | -60 | -40 | 25 | 5849 | -3  | 17 | 40 |
| 3850 | 24  | 8  | 10 | 4850 | 57  | -37 | 25 | 5850 | -9  | 17 | 40 |
| 3851 | -27 | 8  | 10 | 4851 | 51  | -37 | 25 | 5851 | -36 | 17 | 40 |
| 3852 | -33 | 8  | 10 | 4852 | 3   | -34 | 25 | 5852 | 48  | 20 | 40 |
| 3853 | -39 | 8  | 10 | 4853 | -3  | -34 | 25 | 5853 | 39  | 20 | 40 |
| 3854 | -45 | 8  | 10 | 4854 | -45 | -34 | 25 | 5854 | 33  | 20 | 40 |
| 3855 | -51 | 8  | 10 | 4855 | -51 | -34 | 25 | 5855 | -24 | 20 | 40 |
| 3856 | 15  | 11 | 10 | 4856 | -60 | -34 | 25 | 5856 | -30 | 20 | 40 |
| 3857 | 9   | 11 | 10 | 4857 | 60  | -31 | 25 | 5857 | -45 | 20 | 40 |
| 3858 | -9  | 11 | 10 | 4858 | 51  | -31 | 25 | 5858 | 27  | 23 | 40 |
| 3859 | -15 | 11 | 10 | 4859 | 45  | -31 | 25 | 5859 | 6   | 23 | 40 |
| 3860 | 57  | 14 | 10 | 4860 | -45 | -28 | 25 | 5860 | 0   | 23 | 40 |
| 3861 | 51  | 14 | 10 | 4861 | -51 | -28 | 25 | 5861 | 45  | 26 | 40 |
| 3862 | 45  | 14 | 10 | 4862 | -57 | -28 | 25 | 5862 | 39  | 26 | 40 |
| 3863 | 39  | 14 | 10 | 4863 | 60  | -25 | 25 | 5863 | 33  | 26 | 40 |
| 3864 | 30  | 14 | 10 | 4864 | 51  | -25 | 25 | 5864 | -24 | 26 | 40 |
| 3865 | -39 | 14 | 10 | 4865 | 45  | -25 | 25 | 5865 | -30 | 26 | 40 |
| 3866 | -45 | 14 | 10 | 4866 | -51 | -22 | 25 | 5866 | -36 | 26 | 40 |
| 3867 | -51 | 14 | 10 | 4867 | -57 | -22 | 25 | 5867 | 27  | 29 | 40 |
| 3868 | -15 | 17 | 10 | 4868 | 60  | -19 | 25 | 5868 | 21  | 29 | 40 |
| 3869 | -30 | 17 | 10 | 4869 | 51  | -19 | 25 | 5869 | 39  | 32 | 40 |
| 3870 | 51  | 20 | 10 | 4870 | -57 | -16 | 25 | 5870 | 33  | 32 | 40 |
| 3871 | 45  | 20 | 10 | 4871 | 57  | -13 | 25 | 5871 | 9   | 32 | 40 |
| 3872 | 39  | 20 | 10 | 4872 | -57 | -10 | 25 | 5872 | 3   | 32 | 40 |
| 3873 | 30  | 20 | 10 | 4873 | 60  | -4  | 25 | 5873 | -3  | 32 | 40 |
| 3874 | 18  | 20 | 10 | 4874 | 54  | -4  | 25 | 5874 | -9  | 32 | 40 |
| 3875 | 12  | 20 | 10 | 4875 | -51 | -1  | 25 | 5875 | -18 | 32 | 40 |
| 3876 | -30 | 23 | 10 | 4876 | 54  | 2   | 25 | 5876 | -24 | 32 | 40 |
| 3877 | -36 | 23 | 10 | 4877 | -39 | 5   | 25 | 5877 | -30 | 32 | 40 |



|      |     |    |    |      |     |    |    |      |     |     |    |
|------|-----|----|----|------|-----|----|----|------|-----|-----|----|
| 3878 | -42 | 23 | 10 | 4878 | -45 | 5  | 25 | 5878 | -36 | 32  | 40 |
| 3879 | -48 | 23 | 10 | 4879 | -51 | 5  | 25 | 5879 | 27  | 35  | 40 |
| 3880 | 51  | 26 | 10 | 4880 | 57  | 8  | 25 | 5880 | 21  | 35  | 40 |
| 3881 | 45  | 26 | 10 | 4881 | 39  | 8  | 25 | 5881 | -24 | 38  | 40 |
| 3882 | 36  | 26 | 10 | 4882 | 48  | 11 | 25 | 5882 | -30 | 38  | 40 |
| 3883 | -48 | 29 | 10 | 4883 | 3   | 11 | 25 | 5883 | 27  | 41  | 40 |
| 3884 | 51  | 32 | 10 | 4884 | -3  | 11 | 25 | 5884 | 21  | 41  | 40 |
| 3885 | 3   | 32 | 10 | 4885 | -39 | 11 | 25 | 5885 | 15  | 41  | 40 |
| 3886 | -3  | 32 | 10 | 4886 | -45 | 11 | 25 | 5886 | 6   | 41  | 40 |
| 3887 | -45 | 35 | 10 | 4887 | -54 | 11 | 25 | 5887 | 0   | 41  | 40 |
| 3888 | 48  | 38 | 10 | 4888 | 57  | 14 | 25 | 5888 | -6  | 41  | 40 |
| 3889 | 42  | 38 | 10 | 4889 | 36  | 14 | 25 | 5889 | -15 | 41  | 40 |
| 3890 | 9   | 38 | 10 | 4890 | 48  | 17 | 25 | 5890 | -24 | 44  | 40 |
| 3891 | 3   | 38 | 10 | 4891 | -48 | 17 | 25 | 5891 | 21  | 47  | 40 |
| 3892 | -3  | 38 | 10 | 4892 | 36  | 20 | 25 | 5892 | 15  | 47  | 40 |
| 3893 | -45 | 41 | 10 | 4893 | 0   | 20 | 25 | 5893 | -15 | 47  | 40 |
| 3894 | 42  | 44 | 10 | 4894 | 54  | 23 | 25 | 5894 | 9   | 50  | 40 |
| 3895 | 36  | 44 | 10 | 4895 | 48  | 23 | 25 | 5895 | 3   | 50  | 40 |
| 3896 | 9   | 44 | 10 | 4896 | 42  | 23 | 25 | 5896 | -3  | 50  | 40 |
| 3897 | 3   | 44 | 10 | 4897 | -42 | 23 | 25 | 5897 | -9  | 53  | 40 |
| 3898 | -6  | 44 | 10 | 4898 | -48 | 23 | 25 | 5898 | 33  | -76 | 43 |
| 3899 | -12 | 44 | 10 | 4899 | 9   | 26 | 25 | 5899 | 27  | -76 | 43 |
| 3900 | -33 | 47 | 10 | 4900 | 3   | 26 | 25 | 5900 | 21  | -76 | 43 |
| 3901 | -42 | 47 | 10 | 4901 | -3  | 26 | 25 | 5901 | 15  | -76 | 43 |
| 3902 | 42  | 50 | 10 | 4902 | -9  | 26 | 25 | 5902 | 9   | -76 | 43 |
| 3903 | 36  | 50 | 10 | 4903 | 48  | 29 | 25 | 5903 | 3   | -76 | 43 |
| 3904 | 9   | 50 | 10 | 4904 | 42  | 29 | 25 | 5904 | -6  | -76 | 43 |
| 3905 | 0   | 50 | 10 | 4905 | -39 | 29 | 25 | 5905 | -12 | -76 | 43 |
| 3906 | -6  | 50 | 10 | 4906 | 48  | 35 | 25 | 5906 | -18 | -76 | 43 |
| 3907 | -12 | 50 | 10 | 4907 | 42  | 35 | 25 | 5907 | -24 | -76 | 43 |
| 3908 | 27  | 53 | 10 | 4908 | 36  | 35 | 25 | 5908 | -30 | -76 | 43 |
| 3909 | -27 | 53 | 10 | 4909 | 12  | 35 | 25 | 5909 | 36  | -70 | 43 |
| 3910 | -33 | 53 | 10 | 4910 | 6   | 35 | 25 | 5910 | 27  | -70 | 43 |
| 3911 | 36  | 56 | 10 | 4911 | 0   | 35 | 25 | 5911 | 21  | -70 | 43 |
| 3912 | 6   | 56 | 10 | 4912 | -6  | 35 | 25 | 5912 | 15  | -70 | 43 |
| 3913 | 0   | 56 | 10 | 4913 | -12 | 35 | 25 | 5913 | 9   | -70 | 43 |
| 3914 | -6  | 56 | 10 | 4914 | -33 | 35 | 25 | 5914 | 3   | -70 | 43 |
| 3915 | -12 | 56 | 10 | 4915 | -39 | 35 | 25 | 5915 | -6  | -70 | 43 |
| 3916 | -21 | 59 | 10 | 4916 | -45 | 35 | 25 | 5916 | -12 | -70 | 43 |
| 3917 | -27 | 59 | 10 | 4917 | 30  | 38 | 25 | 5917 | -18 | -70 | 43 |
| 3918 | -33 | 59 | 10 | 4918 | 12  | 41 | 25 | 5918 | -24 | -70 | 43 |
| 3919 | 24  | 62 | 10 | 4919 | 6   | 41 | 25 | 5919 | -30 | -70 | 43 |
| 3920 | 18  | 62 | 10 | 4920 | 0   | 41 | 25 | 5920 | -36 | -70 | 43 |
| 3921 | 12  | 62 | 10 | 4921 | -6  | 41 | 25 | 5921 | 45  | -64 | 43 |
| 3922 | 6   | 62 | 10 | 4922 | -12 | 41 | 25 | 5922 | 36  | -64 | 43 |
| 3923 | 0   | 62 | 10 | 4923 | -27 | 41 | 25 | 5923 | 30  | -64 | 43 |
| 3924 | -6  | 62 | 10 | 4924 | -33 | 41 | 25 | 5924 | 15  | -64 | 43 |

|      |     |     |    |      |     |     |    |      |     |     |    |
|------|-----|-----|----|------|-----|-----|----|------|-----|-----|----|
| 3925 | -12 | 62  | 10 | 4925 | -39 | 41  | 25 | 5925 | 9   | -64 | 43 |
| 3926 | -21 | 65  | 10 | 4926 | 42  | 44  | 25 | 5926 | 3   | -64 | 43 |
| 3927 | -12 | -97 | 13 | 4927 | 36  | 44  | 25 | 5927 | -9  | -64 | 43 |
| 3928 | 12  | -94 | 13 | 4928 | 30  | 44  | 25 | 5928 | -24 | -64 | 43 |
| 3929 | -18 | -94 | 13 | 4929 | 24  | 44  | 25 | 5929 | -30 | -64 | 43 |
| 3930 | -24 | -94 | 13 | 4930 | 6   | 47  | 25 | 5930 | -36 | -64 | 43 |
| 3931 | 24  | -91 | 13 | 4931 | -27 | 47  | 25 | 5931 | -42 | -64 | 43 |
| 3932 | 0   | -91 | 13 | 4932 | -33 | 47  | 25 | 5932 | 48  | -58 | 43 |
| 3933 | -6  | -91 | 13 | 4933 | 30  | 50  | 25 | 5933 | 42  | -58 | 43 |
| 3934 | 33  | -88 | 13 | 4934 | 24  | 50  | 25 | 5934 | 36  | -58 | 43 |
| 3935 | 12  | -88 | 13 | 4935 | 0   | 50  | 25 | 5935 | 30  | -58 | 43 |
| 3936 | -24 | -88 | 13 | 4936 | -6  | 50  | 25 | 5936 | 9   | -58 | 43 |
| 3937 | -30 | -88 | 13 | 4937 | 15  | 53  | 25 | 5937 | 3   | -58 | 43 |
| 3938 | 3   | -85 | 13 | 4938 | -21 | 53  | 25 | 5938 | -3  | -58 | 43 |
| 3939 | -6  | -85 | 13 | 4939 | -27 | 53  | 25 | 5939 | -9  | -58 | 43 |
| 3940 | -39 | -85 | 13 | 4940 | 24  | 56  | 25 | 5940 | -42 | -58 | 43 |
| 3941 | 36  | -82 | 13 | 4941 | 15  | 59  | 25 | 5941 | -48 | -58 | 43 |
| 3942 | 30  | -82 | 13 | 4942 | 9   | 59  | 25 | 5942 | 54  | -52 | 43 |
| 3943 | 12  | -82 | 13 | 4943 | 3   | 59  | 25 | 5943 | 48  | -52 | 43 |
| 3944 | -39 | -79 | 13 | 4944 | -3  | 59  | 25 | 5944 | 42  | -52 | 43 |
| 3945 | -45 | -79 | 13 | 4945 | -9  | 59  | 25 | 5945 | 36  | -52 | 43 |
| 3946 | 45  | -76 | 13 | 4946 | -15 | 59  | 25 | 5946 | 30  | -52 | 43 |
| 3947 | 12  | -76 | 13 | 4947 | -21 | 59  | 25 | 5947 | 9   | -52 | 43 |
| 3948 | 6   | -76 | 13 | 4948 | 24  | -85 | 28 | 5948 | 3   | -52 | 43 |
| 3949 | 0   | -76 | 13 | 4949 | 18  | -85 | 28 | 5949 | -3  | -52 | 43 |
| 3950 | -6  | -76 | 13 | 4950 | 9   | -85 | 28 | 5950 | -9  | -52 | 43 |
| 3951 | -15 | -73 | 13 | 4951 | 3   | -85 | 28 | 5951 | -27 | -52 | 43 |
| 3952 | -39 | -73 | 13 | 4952 | -3  | -85 | 28 | 5952 | -33 | -52 | 43 |
| 3953 | -45 | -73 | 13 | 4953 | -9  | -85 | 28 | 5953 | -39 | -52 | 43 |
| 3954 | 51  | -70 | 13 | 4954 | -18 | -85 | 28 | 5954 | -48 | -52 | 43 |
| 3955 | 45  | -70 | 13 | 4955 | -27 | -85 | 28 | 5955 | 57  | -46 | 43 |
| 3956 | 21  | -70 | 13 | 4956 | 33  | -82 | 28 | 5956 | 42  | -46 | 43 |
| 3957 | 15  | -70 | 13 | 4957 | 24  | -79 | 28 | 5957 | 36  | -46 | 43 |
| 3958 | 6   | -70 | 13 | 4958 | 9   | -79 | 28 | 5958 | 30  | -46 | 43 |
| 3959 | 0   | -70 | 13 | 4959 | 3   | -79 | 28 | 5959 | 9   | -46 | 43 |
| 3960 | -18 | -67 | 13 | 4960 | -9  | -79 | 28 | 5960 | 3   | -46 | 43 |
| 3961 | 45  | -64 | 13 | 4961 | -21 | -79 | 28 | 5961 | -3  | -46 | 43 |
| 3962 | 21  | -64 | 13 | 4962 | -27 | -79 | 28 | 5962 | -9  | -46 | 43 |
| 3963 | 15  | -64 | 13 | 4963 | -33 | -79 | 28 | 5963 | 51  | -43 | 43 |
| 3964 | 9   | -64 | 13 | 4964 | -39 | -79 | 28 | 5964 | -51 | -43 | 43 |
| 3965 | 0   | -64 | 13 | 4965 | 42  | -76 | 28 | 5965 | 15  | -40 | 43 |
| 3966 | -9  | -64 | 13 | 4966 | 33  | -76 | 28 | 5966 | 9   | -40 | 43 |
| 3967 | -42 | -64 | 13 | 4967 | 24  | -73 | 28 | 5967 | 3   | -40 | 43 |
| 3968 | -48 | -64 | 13 | 4968 | 18  | -73 | 28 | 5968 | -3  | -40 | 43 |
| 3969 | -54 | -64 | 13 | 4969 | 12  | -73 | 28 | 5969 | -9  | -40 | 43 |
| 3970 | 51  | -61 | 13 | 4970 | 3   | -73 | 28 | 5970 | -15 | -40 | 43 |
| 3971 | -18 | -61 | 13 | 4971 | -21 | -73 | 28 | 5971 | 54  | -37 | 43 |

|      |     |     |    |      |     |     |    |      |     |     |    |
|------|-----|-----|----|------|-----|-----|----|------|-----|-----|----|
| 3972 | 57  | -58 | 13 | 4972 | -27 | -73 | 28 | 5972 | -48 | -37 | 43 |
| 3973 | 21  | -58 | 13 | 4973 | -33 | -73 | 28 | 5973 | 39  | -34 | 43 |
| 3974 | 15  | -58 | 13 | 4974 | -39 | -73 | 28 | 5974 | 33  | -34 | 43 |
| 3975 | -48 | -58 | 13 | 4975 | -45 | -73 | 28 | 5975 | 9   | -34 | 43 |
| 3976 | -57 | -58 | 13 | 4976 | 39  | -70 | 28 | 5976 | 3   | -34 | 43 |
| 3977 | 51  | -55 | 13 | 4977 | 33  | -70 | 28 | 5977 | -3  | -34 | 43 |
| 3978 | 45  | -55 | 13 | 4978 | -6  | -70 | 28 | 5978 | -9  | -34 | 43 |
| 3979 | 6   | -55 | 13 | 4979 | -12 | -70 | 28 | 5979 | -15 | -34 | 43 |
| 3980 | 0   | -55 | 13 | 4980 | 51  | -67 | 28 | 5980 | 54  | -31 | 43 |
| 3981 | -6  | -55 | 13 | 4981 | 24  | -67 | 28 | 5981 | -36 | -31 | 43 |
| 3982 | -12 | -55 | 13 | 4982 | 18  | -67 | 28 | 5982 | -45 | -31 | 43 |
| 3983 | 57  | -52 | 13 | 4983 | 12  | -67 | 28 | 5983 | -57 | -31 | 43 |
| 3984 | 21  | -52 | 13 | 4984 | 3   | -67 | 28 | 5984 | 48  | -28 | 43 |
| 3985 | 15  | -52 | 13 | 4985 | -39 | -67 | 28 | 5985 | 39  | -28 | 43 |
| 3986 | -48 | -52 | 13 | 4986 | -45 | -67 | 28 | 5986 | 12  | -28 | 43 |
| 3987 | -57 | -52 | 13 | 4987 | 42  | -64 | 28 | 5987 | 3   | -28 | 43 |
| 3988 | 51  | -49 | 13 | 4988 | -6  | -64 | 28 | 5988 | -3  | -28 | 43 |
| 3989 | 45  | -49 | 13 | 4989 | -15 | -64 | 28 | 5989 | -9  | -28 | 43 |
| 3990 | 6   | -49 | 13 | 4990 | 51  | -61 | 28 | 5990 | 54  | -25 | 43 |
| 3991 | 0   | -49 | 13 | 4991 | 18  | -61 | 28 | 5991 | -39 | -25 | 43 |
| 3992 | -6  | -49 | 13 | 4992 | 12  | -61 | 28 | 5992 | -45 | -25 | 43 |
| 3993 | 63  | -46 | 13 | 4993 | 6   | -61 | 28 | 5993 | -54 | -25 | 43 |
| 3994 | 57  | -46 | 13 | 4994 | 0   | -61 | 28 | 5994 | 45  | -22 | 43 |
| 3995 | -48 | -46 | 13 | 4995 | 42  | -58 | 28 | 5995 | 39  | -22 | 43 |
| 3996 | -57 | -46 | 13 | 4996 | -9  | -58 | 28 | 5996 | 12  | -22 | 43 |
| 3997 | 51  | -43 | 13 | 4997 | -42 | -58 | 28 | 5997 | 6   | -22 | 43 |
| 3998 | 45  | -43 | 13 | 4998 | -48 | -58 | 28 | 5998 | -6  | -22 | 43 |
| 3999 | 6   | -43 | 13 | 4999 | -54 | -58 | 28 | 5999 | -12 | -22 | 43 |
| 4000 | 60  | -40 | 13 | 5000 | 12  | -55 | 28 | 6000 | -45 | -19 | 43 |

| <b>ROI</b> | <b>x</b> | <b>y</b> | <b>z</b> | <b>ROI</b> | <b>x</b> | <b>y</b> | <b>z</b> |
|------------|----------|----------|----------|------------|----------|----------|----------|
| 6001       | -54      | -19      | 43       | 7001       | -30      | -34      | 61       |
| 6002       | 36       | -16      | 43       | 7002       | -36      | -34      | 61       |
| 6003       | 9        | -16      | 43       | 7003       | -42      | -34      | 61       |
| 6004       | 0        | -16      | 43       | 7004       | 39       | -28      | 61       |
| 6005       | -6       | -16      | 43       | 7005       | 33       | -28      | 61       |
| 6006       | -36      | -16      | 43       | 7006       | 27       | -28      | 61       |
| 6007       | 57       | -13      | 43       | 7007       | 21       | -28      | 61       |
| 6008       | 51       | -13      | 43       | 7008       | 3        | -28      | 61       |
| 6009       | 45       | -13      | 43       | 7009       | -3       | -28      | 61       |
| 6010       | 9        | -10      | 43       | 7010       | -21      | -28      | 61       |
| 6011       | 3        | -10      | 43       | 7011       | -30      | -28      | 61       |
| 6012       | -6       | -10      | 43       | 7012       | -36      | -28      | 61       |
| 6013       | -42      | -10      | 43       | 7013       | -42      | -28      | 61       |
| 6014       | -48      | -10      | 43       | 7014       | 39       | -22      | 61       |
| 6015       | 51       | -7       | 43       | 7015       | 33       | -22      | 61       |
| 6016       | 45       | -7       | 43       | 7016       | 27       | -22      | 61       |

|      |     |    |    |      |     |     |    |
|------|-----|----|----|------|-----|-----|----|
| 6017 | 9   | -4 | 43 | 7017 | 6   | -22 | 61 |
| 6018 | 3   | -4 | 43 | 7018 | -6  | -22 | 61 |
| 6019 | -6  | -4 | 43 | 7019 | -30 | -22 | 61 |
| 6020 | -39 | -4 | 43 | 7020 | -36 | -22 | 61 |
| 6021 | -45 | -4 | 43 | 7021 | -42 | -22 | 61 |
| 6022 | 51  | -1 | 43 | 7022 | 36  | -16 | 61 |
| 6023 | 45  | -1 | 43 | 7023 | 30  | -16 | 61 |
| 6024 | 39  | -1 | 43 | 7024 | 9   | -16 | 61 |
| 6025 | -12 | -1 | 43 | 7025 | 0   | -16 | 61 |
| 6026 | 9   | 2  | 43 | 7026 | -6  | -16 | 61 |
| 6027 | 0   | 2  | 43 | 7027 | -36 | -16 | 61 |
| 6028 | -6  | 2  | 43 | 7028 | -21 | -13 | 61 |
| 6029 | -36 | 2  | 43 | 7029 | 36  | -10 | 61 |
| 6030 | -45 | 2  | 43 | 7030 | 30  | -10 | 61 |
| 6031 | -51 | 2  | 43 | 7031 | 24  | -10 | 61 |
| 6032 | 45  | 5  | 43 | 7032 | 12  | -10 | 61 |
| 6033 | 39  | 5  | 43 | 7033 | 3   | -10 | 61 |
| 6034 | -12 | 5  | 43 | 7034 | -6  | -10 | 61 |
| 6035 | 9   | 8  | 43 | 7035 | -36 | -10 | 61 |
| 6036 | 0   | 8  | 43 | 7036 | 18  | -7  | 61 |
| 6037 | -6  | 8  | 43 | 7037 | -18 | -7  | 61 |
| 6038 | -36 | 8  | 43 | 7038 | 12  | -4  | 61 |
| 6039 | -45 | 8  | 43 | 7039 | 3   | -4  | 61 |
| 6040 | 48  | 11 | 43 | 7040 | -3  | -4  | 61 |
| 6041 | 36  | 11 | 43 | 7041 | -30 | -4  | 61 |
| 6042 | 9   | 14 | 43 | 7042 | 30  | -1  | 61 |
| 6043 | 0   | 14 | 43 | 7043 | 24  | -1  | 61 |
| 6044 | -6  | 14 | 43 | 7044 | 18  | -1  | 61 |
| 6045 | -27 | 14 | 43 | 7045 | -12 | -1  | 61 |
| 6046 | 42  | 17 | 43 | 7046 | 9   | 2   | 61 |
| 6047 | 36  | 17 | 43 | 7047 | 3   | 2   | 61 |
| 6048 | 30  | 17 | 43 | 7048 | -3  | 2   | 61 |
| 6049 | 24  | 17 | 43 | 7049 | -24 | 2   | 61 |
| 6050 | 9   | 20 | 43 | 7050 | 30  | 5   | 61 |
| 6051 | 3   | 20 | 43 | 7051 | -15 | 5   | 61 |
| 6052 | -6  | 20 | 43 | 7052 | -33 | 5   | 61 |
| 6053 | -39 | 20 | 43 | 7053 | 18  | 8   | 61 |
| 6054 | 42  | 23 | 43 | 7054 | 9   | 8   | 61 |
| 6055 | 36  | 23 | 43 | 7055 | 3   | 8   | 61 |
| 6056 | 21  | 23 | 43 | 7056 | -3  | 8   | 61 |
| 6057 | -21 | 23 | 43 | 7057 | -24 | 8   | 61 |
| 6058 | -27 | 23 | 43 | 7058 | -15 | 11  | 61 |
| 6059 | -33 | 23 | 43 | 7059 | 27  | 14  | 61 |
| 6060 | 9   | 26 | 43 | 7060 | 21  | 14  | 61 |
| 6061 | 3   | 26 | 43 | 7061 | 15  | 14  | 61 |
| 6062 | -3  | 26 | 43 | 7062 | 9   | 14  | 61 |
| 6063 | -9  | 26 | 43 | 7063 | 3   | 14  | 61 |

|      |     |     |    |      |     |     |    |
|------|-----|-----|----|------|-----|-----|----|
| 6064 | 36  | 29  | 43 | 7064 | -3  | 14  | 61 |
| 6065 | -21 | 29  | 43 | 7065 | -9  | 14  | 61 |
| 6066 | -27 | 29  | 43 | 7066 | -24 | 14  | 61 |
| 6067 | -33 | 29  | 43 | 7067 | 21  | 20  | 61 |
| 6068 | 24  | 32  | 43 | 7068 | 12  | 20  | 61 |
| 6069 | 18  | 32  | 43 | 7069 | 3   | 20  | 61 |
| 6070 | 6   | 35  | 43 | 7070 | -3  | 20  | 61 |
| 6071 | 0   | 35  | 43 | 7071 | -9  | 20  | 61 |
| 6072 | -6  | 35  | 43 | 7072 | -18 | 20  | 61 |
| 6073 | -21 | 35  | 43 | 7073 | 12  | 26  | 61 |
| 6074 | -27 | 35  | 43 | 7074 | 6   | 26  | 61 |
| 6075 | 30  | 38  | 43 | 7075 | -3  | 26  | 61 |
| 6076 | 24  | 38  | 43 | 7076 | -9  | 26  | 61 |
| 6077 | 18  | 38  | 43 | 7077 | 18  | -61 | 64 |
| 6078 | -12 | 38  | 43 | 7078 | 12  | -61 | 64 |
| 6079 | -21 | 41  | 43 | 7079 | -12 | -61 | 64 |
| 6080 | 24  | 44  | 43 | 7080 | -21 | -61 | 64 |
| 6081 | 18  | 44  | 43 | 7081 | 27  | -55 | 64 |
| 6082 | 12  | 44  | 43 | 7082 | 21  | -55 | 64 |
| 6083 | 3   | 44  | 43 | 7083 | 12  | -55 | 64 |
| 6084 | -3  | 44  | 43 | 7084 | 6   | -55 | 64 |
| 6085 | -9  | 44  | 43 | 7085 | 0   | -55 | 64 |
| 6086 | 18  | -79 | 46 | 7086 | -6  | -55 | 64 |
| 6087 | 30  | -73 | 46 | 7087 | -12 | -55 | 64 |
| 6088 | 24  | -73 | 46 | 7088 | -18 | -55 | 64 |
| 6089 | 18  | -73 | 46 | 7089 | -27 | -55 | 64 |
| 6090 | 12  | -73 | 46 | 7090 | 33  | -49 | 64 |
| 6091 | 6   | -73 | 46 | 7091 | 27  | -49 | 64 |
| 6092 | 0   | -73 | 46 | 7092 | 21  | -49 | 64 |
| 6093 | -9  | -73 | 46 | 7093 | 15  | -49 | 64 |
| 6094 | -15 | -73 | 46 | 7094 | 6   | -49 | 64 |
| 6095 | -21 | -73 | 46 | 7095 | 0   | -49 | 64 |
| 6096 | -27 | -73 | 46 | 7096 | -6  | -49 | 64 |
| 6097 | -33 | -73 | 46 | 7097 | -12 | -49 | 64 |
| 6098 | 42  | -67 | 46 | 7098 | -18 | -49 | 64 |
| 6099 | 33  | -67 | 46 | 7099 | -24 | -49 | 64 |
| 6100 | 24  | -67 | 46 | 7100 | -30 | -49 | 64 |
| 6101 | 18  | -67 | 46 | 7101 | 33  | -43 | 64 |
| 6102 | 12  | -67 | 46 | 7102 | 27  | -43 | 64 |
| 6103 | 6   | -67 | 46 | 7103 | 21  | -43 | 64 |
| 6104 | 0   | -67 | 46 | 7104 | 12  | -43 | 64 |
| 6105 | -15 | -67 | 46 | 7105 | 6   | -43 | 64 |
| 6106 | -21 | -67 | 46 | 7106 | 0   | -43 | 64 |
| 6107 | -27 | -67 | 46 | 7107 | -6  | -43 | 64 |
| 6108 | -33 | -67 | 46 | 7108 | -12 | -43 | 64 |
| 6109 | -39 | -67 | 46 | 7109 | -18 | -43 | 64 |
| 6110 | 39  | -61 | 46 | 7110 | -24 | -43 | 64 |

|      |     |     |    |      |     |     |    |
|------|-----|-----|----|------|-----|-----|----|
| 6111 | 33  | -61 | 46 | 7111 | -30 | -43 | 64 |
| 6112 | 27  | -61 | 46 | 7112 | 36  | -37 | 64 |
| 6113 | 12  | -61 | 46 | 7113 | 27  | -37 | 64 |
| 6114 | 6   | -61 | 46 | 7114 | 21  | -37 | 64 |
| 6115 | 0   | -61 | 46 | 7115 | 12  | -37 | 64 |
| 6116 | -6  | -61 | 46 | 7116 | 6   | -37 | 64 |
| 6117 | -21 | -61 | 46 | 7117 | 0   | -37 | 64 |
| 6118 | -27 | -61 | 46 | 7118 | -6  | -37 | 64 |
| 6119 | -33 | -61 | 46 | 7119 | -12 | -37 | 64 |
| 6120 | -39 | -61 | 46 | 7120 | -18 | -37 | 64 |
| 6121 | -45 | -61 | 46 | 7121 | -24 | -37 | 64 |
| 6122 | 51  | -55 | 46 | 7122 | 36  | -31 | 64 |
| 6123 | 45  | -55 | 46 | 7123 | 30  | -31 | 64 |
| 6124 | 39  | -55 | 46 | 7124 | 6   | -31 | 64 |
| 6125 | 33  | -55 | 46 | 7125 | 0   | -31 | 64 |
| 6126 | 27  | -55 | 46 | 7126 | -6  | -31 | 64 |
| 6127 | 12  | -55 | 46 | 7127 | -15 | -31 | 64 |
| 6128 | 6   | -55 | 46 | 7128 | -24 | -31 | 64 |
| 6129 | 0   | -55 | 46 | 7129 | -33 | -31 | 64 |
| 6130 | -6  | -55 | 46 | 7130 | 36  | -25 | 64 |
| 6131 | -12 | -55 | 46 | 7131 | 30  | -25 | 64 |
| 6132 | -30 | -55 | 46 | 7132 | 24  | -25 | 64 |
| 6133 | -36 | -55 | 46 | 7133 | 9   | -25 | 64 |
| 6134 | -45 | -55 | 46 | 7134 | 0   | -25 | 64 |
| 6135 | 51  | -49 | 46 | 7135 | -24 | -25 | 64 |
| 6136 | 45  | -49 | 46 | 7136 | -33 | -25 | 64 |
| 6137 | 39  | -49 | 46 | 7137 | 3   | -19 | 64 |
| 6138 | 33  | -49 | 46 | 7138 | -3  | -19 | 64 |
| 6139 | 12  | -49 | 46 | 7139 | -24 | -19 | 64 |
| 6140 | 6   | -49 | 46 | 7140 | -33 | -19 | 64 |
| 6141 | 0   | -49 | 46 | 7141 | 24  | -16 | 64 |
| 6142 | -6  | -49 | 46 | 7142 | 33  | -13 | 64 |
| 6143 | -12 | -49 | 46 | 7143 | 6   | -13 | 64 |
| 6144 | -30 | -49 | 46 | 7144 | -3  | -13 | 64 |
| 6145 | -36 | -49 | 46 | 7145 | -9  | -13 | 64 |
| 6146 | -42 | -49 | 46 | 7146 | -15 | -13 | 64 |
| 6147 | -51 | -49 | 46 | 7147 | -27 | -13 | 64 |
| 6148 | 45  | -43 | 46 | 7148 | -33 | -13 | 64 |
| 6149 | 39  | -43 | 46 | 7149 | 33  | -7  | 64 |
| 6150 | 33  | -43 | 46 | 7150 | 27  | -7  | 64 |
| 6151 | 12  | -43 | 46 | 7151 | 9   | -7  | 64 |
| 6152 | 6   | -43 | 46 | 7152 | 0   | -7  | 64 |
| 6153 | 0   | -43 | 46 | 7153 | -9  | -7  | 64 |
| 6154 | -6  | -43 | 46 | 7154 | -24 | -7  | 64 |
| 6155 | -12 | -43 | 46 | 7155 | 21  | -4  | 64 |
| 6156 | -30 | -43 | 46 | 7156 | -15 | -4  | 64 |
| 6157 | -36 | -43 | 46 | 7157 | 6   | -1  | 64 |

|      |     |     |    |      |     |     |    |
|------|-----|-----|----|------|-----|-----|----|
| 6158 | -42 | -43 | 46 | 7158 | 0   | -1  | 64 |
| 6159 | -54 | -40 | 46 | 7159 | -6  | -1  | 64 |
| 6160 | 48  | -37 | 46 | 7160 | -21 | -1  | 64 |
| 6161 | 42  | -37 | 46 | 7161 | -27 | -1  | 64 |
| 6162 | 36  | -37 | 46 | 7162 | 27  | 2   | 64 |
| 6163 | 12  | -37 | 46 | 7163 | 21  | 2   | 64 |
| 6164 | 6   | -37 | 46 | 7164 | 15  | 2   | 64 |
| 6165 | 0   | -37 | 46 | 7165 | 6   | 5   | 64 |
| 6166 | -6  | -37 | 46 | 7166 | 0   | 5   | 64 |
| 6167 | -12 | -37 | 46 | 7167 | -6  | 5   | 64 |
| 6168 | -33 | -37 | 46 | 7168 | -21 | 5   | 64 |
| 6169 | -39 | -37 | 46 | 7169 | -27 | 5   | 64 |
| 6170 | 57  | -34 | 46 | 7170 | 27  | 8   | 64 |
| 6171 | -51 | -34 | 46 | 7171 | -12 | 8   | 64 |
| 6172 | 45  | -31 | 46 | 7172 | 12  | 11  | 64 |
| 6173 | 36  | -31 | 46 | 7173 | 6   | 11  | 64 |
| 6174 | 15  | -31 | 46 | 7174 | 0   | 11  | 64 |
| 6175 | 6   | -31 | 46 | 7175 | -6  | 11  | 64 |
| 6176 | 0   | -31 | 46 | 7176 | -21 | 11  | 64 |
| 6177 | -6  | -31 | 46 | 7177 | 18  | 17  | 64 |
| 6178 | -12 | -31 | 46 | 7178 | 6   | 17  | 64 |
| 6179 | 57  | -28 | 46 | 7179 | 0   | 17  | 64 |
| 6180 | -42 | -28 | 46 | 7180 | -6  | 17  | 64 |
| 6181 | -48 | -28 | 46 | 7181 | -12 | 17  | 64 |
| 6182 | 42  | -25 | 46 | 7182 | 15  | -58 | 67 |
| 6183 | 36  | -25 | 46 | 7183 | -15 | -58 | 67 |
| 6184 | 15  | -25 | 46 | 7184 | 24  | -52 | 67 |
| 6185 | 9   | -25 | 46 | 7185 | 18  | -52 | 67 |
| 6186 | 0   | -25 | 46 | 7186 | 9   | -52 | 67 |
| 6187 | 57  | -22 | 46 | 7187 | -9  | -52 | 67 |
| 6188 | 51  | -22 | 46 | 7188 | -15 | -52 | 67 |
| 6189 | -36 | -22 | 46 | 7189 | -21 | -52 | 67 |
| 6190 | -42 | -22 | 46 | 7190 | 30  | -46 | 67 |
| 6191 | -48 | -22 | 46 | 7191 | 24  | -46 | 67 |
| 6192 | 42  | -19 | 46 | 7192 | 18  | -46 | 67 |
| 6193 | 15  | -19 | 46 | 7193 | 9   | -46 | 67 |
| 6194 | 3   | -19 | 46 | 7194 | 3   | -46 | 67 |
| 6195 | -3  | -19 | 46 | 7195 | -3  | -46 | 67 |
| 6196 | -9  | -19 | 46 | 7196 | -9  | -46 | 67 |
| 6197 | 54  | -16 | 46 | 7197 | -15 | -46 | 67 |
| 6198 | 48  | -16 | 46 | 7198 | -21 | -46 | 67 |
| 6199 | -42 | -16 | 46 | 7199 | -27 | -46 | 67 |
| 6200 | -48 | -16 | 46 | 7200 | 30  | -40 | 67 |
| 6201 | 39  | -13 | 46 | 7201 | 24  | -40 | 67 |
| 6202 | 12  | -13 | 46 | 7202 | 18  | -40 | 67 |
| 6203 | 6   | -13 | 46 | 7203 | 9   | -40 | 67 |
| 6204 | -3  | -13 | 46 | 7204 | 3   | -40 | 67 |

|      |     |     |    |      |     |     |    |
|------|-----|-----|----|------|-----|-----|----|
| 6205 | -9  | -13 | 46 | 7205 | -3  | -40 | 67 |
| 6206 | 54  | -10 | 46 | 7206 | -9  | -40 | 67 |
| 6207 | 48  | -10 | 46 | 7207 | -15 | -40 | 67 |
| 6208 | -36 | -10 | 46 | 7208 | -21 | -40 | 67 |
| 6209 | 39  | -7  | 46 | 7209 | -27 | -40 | 67 |
| 6210 | 12  | -7  | 46 | 7210 | 33  | -34 | 67 |
| 6211 | 6   | -7  | 46 | 7211 | 24  | -34 | 67 |
| 6212 | 0   | -7  | 46 | 7212 | 18  | -34 | 67 |
| 6213 | -9  | -7  | 46 | 7213 | 9   | -34 | 67 |
| 6214 | -30 | -7  | 46 | 7214 | 3   | -34 | 67 |
| 6215 | -51 | -7  | 46 | 7215 | -3  | -34 | 67 |
| 6216 | 48  | -4  | 46 | 7216 | -9  | -34 | 67 |
| 6217 | 33  | -4  | 46 | 7217 | -21 | -34 | 67 |
| 6218 | 27  | -1  | 46 | 7218 | -27 | -34 | 67 |
| 6219 | 12  | -1  | 46 | 7219 | 33  | -28 | 67 |
| 6220 | 6   | -1  | 46 | 7220 | 27  | -28 | 67 |
| 6221 | -3  | -1  | 46 | 7221 | 21  | -28 | 67 |
| 6222 | -27 | -1  | 46 | 7222 | 3   | -28 | 67 |
| 6223 | -33 | -1  | 46 | 7223 | -3  | -28 | 67 |
| 6224 | -42 | -1  | 46 | 7224 | -9  | -28 | 67 |
| 6225 | -48 | -1  | 46 | 7225 | -18 | -28 | 67 |
| 6226 | 48  | 2   | 46 | 7226 | -27 | -28 | 67 |
| 6227 | 42  | 2   | 46 | 7227 | 33  | -22 | 67 |
| 6228 | 36  | 2   | 46 | 7228 | 27  | -22 | 67 |
| 6229 | 30  | 5   | 46 | 7229 | 21  | -22 | 67 |
| 6230 | 12  | 5   | 46 | 7230 | 6   | -22 | 67 |
| 6231 | 6   | 5   | 46 | 7231 | -6  | -22 | 67 |
| 6232 | -3  | 5   | 46 | 7232 | -18 | -22 | 67 |
| 6233 | -39 | 5   | 46 | 7233 | -27 | -22 | 67 |
| 6234 | -48 | 5   | 46 | 7234 | 30  | -16 | 67 |
| 6235 | 42  | 8   | 46 | 7235 | 18  | -16 | 67 |
| 6236 | -27 | 8   | 46 | 7236 | 9   | -16 | 67 |
| 6237 | 30  | 11  | 46 | 7237 | 0   | -16 | 67 |
| 6238 | 24  | 11  | 46 | 7238 | -6  | -16 | 67 |
| 6239 | 12  | 11  | 46 | 7239 | -12 | -16 | 67 |
| 6240 | 6   | 11  | 46 | 7240 | -18 | -16 | 67 |
| 6241 | -3  | 11  | 46 | 7241 | -30 | -16 | 67 |
| 6242 | -9  | 11  | 46 | 7242 | 30  | -10 | 67 |
| 6243 | -33 | 11  | 46 | 7243 | 24  | -10 | 67 |
| 6244 | -39 | 11  | 46 | 7244 | 18  | -10 | 67 |
| 6245 | 45  | 14  | 46 | 7245 | 12  | -10 | 67 |
| 6246 | 39  | 14  | 46 | 7246 | 3   | -10 | 67 |
| 6247 | 6   | 17  | 46 | 7247 | -6  | -10 | 67 |
| 6248 | -3  | 17  | 46 | 7248 | -12 | -10 | 67 |
| 6249 | -9  | 17  | 46 | 7249 | -18 | -10 | 67 |
| 6250 | -21 | 17  | 46 | 7250 | 15  | -4  | 67 |
| 6251 | -30 | 17  | 46 | 7251 | 3   | -4  | 67 |



|      |     |     |    |      |     |    |    |
|------|-----|-----|----|------|-----|----|----|
| 6252 | -36 | 17  | 46 | 7252 | -3  | -4 | 67 |
| 6253 | -42 | 17  | 46 | 7253 | 24  | -1 | 67 |
| 6254 | 39  | 20  | 46 | 7254 | -12 | -1 | 67 |
| 6255 | 33  | 20  | 46 | 7255 | 9   | 2  | 67 |
| 6256 | 27  | 20  | 46 | 7256 | 3   | 2  | 67 |
| 6257 | 6   | 23  | 46 | 7257 | -3  | 2  | 67 |
| 6258 | 0   | 23  | 46 | 7258 | -18 | 2  | 67 |
| 6259 | 39  | 26  | 46 | 7259 | 18  | 5  | 67 |
| 6260 | 33  | 26  | 46 | 7260 | 9   | 8  | 67 |
| 6261 | 27  | 26  | 46 | 7261 | 3   | 8  | 67 |
| 6262 | -18 | 26  | 46 | 7262 | -3  | 8  | 67 |
| 6263 | -24 | 26  | 46 | 7263 | -18 | 8  | 67 |
| 6264 | -30 | 26  | 46 | 7264 | 9   | 14 | 67 |
| 6265 | -36 | 26  | 46 | 7265 | 3   | 14 | 67 |
| 6266 | 21  | 29  | 46 | 7266 | -3  | 14 | 67 |
| 6267 | 6   | 29  | 46 |      |     |    |    |
| 6268 | 0   | 29  | 46 |      |     |    |    |
| 6269 | -6  | 29  | 46 |      |     |    |    |
| 6270 | 33  | 32  | 46 |      |     |    |    |
| 6271 | -15 | 32  | 46 |      |     |    |    |
| 6272 | -24 | 32  | 46 |      |     |    |    |
| 6273 | -30 | 32  | 46 |      |     |    |    |
| 6274 | 27  | 35  | 46 |      |     |    |    |
| 6275 | 21  | 35  | 46 |      |     |    |    |
| 6276 | 15  | 35  | 46 |      |     |    |    |
| 6277 | 9   | 38  | 46 |      |     |    |    |
| 6278 | 3   | 38  | 46 |      |     |    |    |
| 6279 | -3  | 38  | 46 |      |     |    |    |
| 6280 | -18 | 38  | 46 |      |     |    |    |
| 6281 | -24 | 38  | 46 |      |     |    |    |
| 6282 | 21  | 41  | 46 |      |     |    |    |
| 6283 | 15  | 41  | 46 |      |     |    |    |
| 6284 | -15 | 44  | 46 |      |     |    |    |
| 6285 | 9   | 47  | 46 |      |     |    |    |
| 6286 | 0   | 47  | 46 |      |     |    |    |
| 6287 | -6  | 47  | 46 |      |     |    |    |
| 6288 | 21  | -76 | 49 |      |     |    |    |
| 6289 | 15  | -76 | 49 |      |     |    |    |
| 6290 | -12 | -76 | 49 |      |     |    |    |
| 6291 | -18 | -76 | 49 |      |     |    |    |
| 6292 | 27  | -70 | 49 |      |     |    |    |
| 6293 | 21  | -70 | 49 |      |     |    |    |
| 6294 | 15  | -70 | 49 |      |     |    |    |
| 6295 | 9   | -70 | 49 |      |     |    |    |
| 6296 | 3   | -70 | 49 |      |     |    |    |
| 6297 | -3  | -70 | 49 |      |     |    |    |
| 6298 | -12 | -70 | 49 |      |     |    |    |

|      |     |     |    |
|------|-----|-----|----|
| 6299 | -18 | -70 | 49 |
| 6300 | -24 | -70 | 49 |
| 6301 | -30 | -70 | 49 |
| 6302 | 36  | -64 | 49 |
| 6303 | 30  | -64 | 49 |
| 6304 | 21  | -64 | 49 |
| 6305 | 15  | -64 | 49 |
| 6306 | 9   | -64 | 49 |
| 6307 | 3   | -64 | 49 |
| 6308 | -3  | -64 | 49 |
| 6309 | -9  | -64 | 49 |
| 6310 | -18 | -64 | 49 |
| 6311 | -24 | -64 | 49 |
| 6312 | -30 | -64 | 49 |
| 6313 | -36 | -64 | 49 |
| 6314 | 42  | -58 | 49 |
| 6315 | 36  | -58 | 49 |
| 6316 | 30  | -58 | 49 |
| 6317 | 9   | -58 | 49 |
| 6318 | 3   | -58 | 49 |
| 6319 | -3  | -58 | 49 |
| 6320 | -9  | -58 | 49 |
| 6321 | -24 | -58 | 49 |
| 6322 | -42 | -58 | 49 |
| 6323 | 48  | -52 | 49 |
| 6324 | 42  | -52 | 49 |
| 6325 | 36  | -52 | 49 |
| 6326 | 30  | -52 | 49 |
| 6327 | 9   | -52 | 49 |
| 6328 | 3   | -52 | 49 |
| 6329 | -3  | -52 | 49 |
| 6330 | -9  | -52 | 49 |
| 6331 | -27 | -52 | 49 |
| 6332 | -33 | -52 | 49 |
| 6333 | -39 | -52 | 49 |
| 6334 | -48 | -52 | 49 |
| 6335 | 48  | -46 | 49 |
| 6336 | 42  | -46 | 49 |
| 6337 | 36  | -46 | 49 |
| 6338 | 30  | -46 | 49 |
| 6339 | 9   | -46 | 49 |
| 6340 | 3   | -46 | 49 |
| 6341 | -3  | -46 | 49 |
| 6342 | -9  | -46 | 49 |
| 6343 | -33 | -46 | 49 |
| 6344 | -39 | -46 | 49 |
| 6345 | -45 | -46 | 49 |

|      |     |     |    |
|------|-----|-----|----|
| 6346 | -51 | -43 | 49 |
| 6347 | 54  | -40 | 49 |
| 6348 | 30  | -40 | 49 |
| 6349 | 15  | -40 | 49 |
| 6350 | 9   | -40 | 49 |
| 6351 | 3   | -40 | 49 |
| 6352 | -3  | -40 | 49 |
| 6353 | -9  | -40 | 49 |
| 6354 | -15 | -40 | 49 |
| 6355 | -45 | -40 | 49 |
| 6356 | 51  | -34 | 49 |
| 6357 | 39  | -34 | 49 |
| 6358 | 33  | -34 | 49 |
| 6359 | 9   | -34 | 49 |
| 6360 | 3   | -34 | 49 |
| 6361 | -3  | -34 | 49 |
| 6362 | -9  | -34 | 49 |
| 6363 | -15 | -34 | 49 |
| 6364 | -36 | -34 | 49 |
| 6365 | -42 | -34 | 49 |
| 6366 | 51  | -28 | 49 |
| 6367 | 39  | -28 | 49 |
| 6368 | 33  | -28 | 49 |
| 6369 | 12  | -28 | 49 |
| 6370 | 3   | -28 | 49 |
| 6371 | -3  | -28 | 49 |
| 6372 | -9  | -28 | 49 |
| 6373 | -36 | -28 | 49 |
| 6374 | -45 | -25 | 49 |
| 6375 | -51 | -25 | 49 |
| 6376 | 45  | -22 | 49 |
| 6377 | 39  | -22 | 49 |
| 6378 | 33  | -22 | 49 |
| 6379 | 12  | -22 | 49 |
| 6380 | 6   | -22 | 49 |
| 6381 | -6  | -22 | 49 |
| 6382 | -39 | -19 | 49 |
| 6383 | -45 | -19 | 49 |
| 6384 | -51 | -19 | 49 |
| 6385 | 36  | -16 | 49 |
| 6386 | 9   | -16 | 49 |
| 6387 | 0   | -16 | 49 |
| 6388 | -6  | -16 | 49 |
| 6389 | 51  | -13 | 49 |
| 6390 | 45  | -13 | 49 |
| 6391 | -39 | -13 | 49 |
| 6392 | -45 | -13 | 49 |

|      |     |     |    |
|------|-----|-----|----|
| 6393 | 36  | -10 | 49 |
| 6394 | 9   | -10 | 49 |
| 6395 | 3   | -10 | 49 |
| 6396 | -6  | -10 | 49 |
| 6397 | -27 | -10 | 49 |
| 6398 | 51  | -7  | 49 |
| 6399 | 45  | -7  | 49 |
| 6400 | 30  | -7  | 49 |
| 6401 | -39 | -7  | 49 |
| 6402 | -45 | -7  | 49 |
| 6403 | 24  | -4  | 49 |
| 6404 | 9   | -4  | 49 |
| 6405 | 3   | -4  | 49 |
| 6406 | -6  | -4  | 49 |
| 6407 | -24 | -4  | 49 |
| 6408 | 45  | -1  | 49 |
| 6409 | 39  | -1  | 49 |
| 6410 | 24  | 2   | 49 |
| 6411 | 9   | 2   | 49 |
| 6412 | 3   | 2   | 49 |
| 6413 | -6  | 2   | 49 |
| 6414 | -24 | 2   | 49 |
| 6415 | -30 | 2   | 49 |
| 6416 | -36 | 2   | 49 |
| 6417 | -45 | 2   | 49 |
| 6418 | 45  | 5   | 49 |
| 6419 | 39  | 5   | 49 |
| 6420 | 33  | 8   | 49 |
| 6421 | 27  | 8   | 49 |
| 6422 | 9   | 8   | 49 |
| 6423 | 3   | 8   | 49 |
| 6424 | -6  | 8   | 49 |
| 6425 | -21 | 8   | 49 |
| 6426 | -36 | 8   | 49 |
| 6427 | -42 | 8   | 49 |
| 6428 | 33  | 14  | 49 |
| 6429 | 27  | 14  | 49 |
| 6430 | 21  | 14  | 49 |
| 6431 | 9   | 14  | 49 |
| 6432 | 3   | 14  | 49 |
| 6433 | -6  | 14  | 49 |
| 6434 | -24 | 14  | 49 |
| 6435 | 42  | 17  | 49 |
| 6436 | 21  | 20  | 49 |
| 6437 | 9   | 20  | 49 |
| 6438 | 3   | 20  | 49 |
| 6439 | -6  | 20  | 49 |

|      |     |     |    |
|------|-----|-----|----|
| 6440 | -18 | 20  | 49 |
| 6441 | -24 | 20  | 49 |
| 6442 | -33 | 20  | 49 |
| 6443 | -39 | 20  | 49 |
| 6444 | 36  | 23  | 49 |
| 6445 | 30  | 23  | 49 |
| 6446 | 18  | 26  | 49 |
| 6447 | 9   | 26  | 49 |
| 6448 | 3   | 26  | 49 |
| 6449 | -3  | 26  | 49 |
| 6450 | -9  | 26  | 49 |
| 6451 | 30  | 29  | 49 |
| 6452 | -21 | 29  | 49 |
| 6453 | -27 | 29  | 49 |
| 6454 | 24  | 32  | 49 |
| 6455 | 18  | 32  | 49 |
| 6456 | 12  | 32  | 49 |
| 6457 | 3   | 32  | 49 |
| 6458 | -3  | 32  | 49 |
| 6459 | -9  | 32  | 49 |
| 6460 | -21 | 35  | 49 |
| 6461 | 18  | 38  | 49 |
| 6462 | -9  | 38  | 49 |
| 6463 | 6   | 41  | 49 |
| 6464 | 0   | 41  | 49 |
| 6465 | 12  | 44  | 49 |
| 6466 | -9  | 44  | 49 |
| 6467 | 24  | -73 | 52 |
| 6468 | 18  | -73 | 52 |
| 6469 | 12  | -73 | 52 |
| 6470 | -9  | -73 | 52 |
| 6471 | -15 | -73 | 52 |
| 6472 | -21 | -73 | 52 |
| 6473 | 33  | -67 | 52 |
| 6474 | 24  | -67 | 52 |
| 6475 | 18  | -67 | 52 |
| 6476 | 12  | -67 | 52 |
| 6477 | 6   | -67 | 52 |
| 6478 | 0   | -67 | 52 |
| 6479 | -6  | -67 | 52 |
| 6480 | -15 | -67 | 52 |
| 6481 | -21 | -67 | 52 |
| 6482 | -27 | -67 | 52 |
| 6483 | -33 | -67 | 52 |
| 6484 | 39  | -61 | 52 |
| 6485 | 33  | -61 | 52 |
| 6486 | 27  | -61 | 52 |

|      |     |     |    |
|------|-----|-----|----|
| 6487 | 18  | -61 | 52 |
| 6488 | 12  | -61 | 52 |
| 6489 | 6   | -61 | 52 |
| 6490 | 0   | -61 | 52 |
| 6491 | -6  | -61 | 52 |
| 6492 | -12 | -61 | 52 |
| 6493 | -21 | -61 | 52 |
| 6494 | -27 | -61 | 52 |
| 6495 | -33 | -61 | 52 |
| 6496 | -39 | -61 | 52 |
| 6497 | 45  | -55 | 52 |
| 6498 | 39  | -55 | 52 |
| 6499 | 33  | -55 | 52 |
| 6500 | 27  | -55 | 52 |
| 6501 | 12  | -55 | 52 |
| 6502 | 6   | -55 | 52 |
| 6503 | 0   | -55 | 52 |
| 6504 | -6  | -55 | 52 |
| 6505 | -12 | -55 | 52 |
| 6506 | -30 | -55 | 52 |
| 6507 | -36 | -55 | 52 |
| 6508 | 45  | -49 | 52 |
| 6509 | 39  | -49 | 52 |
| 6510 | 33  | -49 | 52 |
| 6511 | 12  | -49 | 52 |
| 6512 | 6   | -49 | 52 |
| 6513 | 0   | -49 | 52 |
| 6514 | -6  | -49 | 52 |
| 6515 | -12 | -49 | 52 |
| 6516 | -30 | -49 | 52 |
| 6517 | -36 | -49 | 52 |
| 6518 | -42 | -49 | 52 |
| 6519 | 45  | -43 | 52 |
| 6520 | 39  | -43 | 52 |
| 6521 | 33  | -43 | 52 |
| 6522 | 12  | -43 | 52 |
| 6523 | 6   | -43 | 52 |
| 6524 | 0   | -43 | 52 |
| 6525 | -6  | -43 | 52 |
| 6526 | -12 | -43 | 52 |
| 6527 | -30 | -43 | 52 |
| 6528 | -36 | -43 | 52 |
| 6529 | -42 | -43 | 52 |
| 6530 | 48  | -37 | 52 |
| 6531 | 42  | -37 | 52 |
| 6532 | 36  | -37 | 52 |
| 6533 | 12  | -37 | 52 |

|      |     |     |    |
|------|-----|-----|----|
| 6534 | 6   | -37 | 52 |
| 6535 | 0   | -37 | 52 |
| 6536 | -6  | -37 | 52 |
| 6537 | -12 | -37 | 52 |
| 6538 | -30 | -37 | 52 |
| 6539 | -39 | -37 | 52 |
| 6540 | -48 | -37 | 52 |
| 6541 | 48  | -31 | 52 |
| 6542 | 42  | -31 | 52 |
| 6543 | 36  | -31 | 52 |
| 6544 | 30  | -31 | 52 |
| 6545 | 6   | -31 | 52 |
| 6546 | 0   | -31 | 52 |
| 6547 | -6  | -31 | 52 |
| 6548 | -12 | -31 | 52 |
| 6549 | -33 | -31 | 52 |
| 6550 | -39 | -31 | 52 |
| 6551 | -45 | -31 | 52 |
| 6552 | 48  | -25 | 52 |
| 6553 | 42  | -25 | 52 |
| 6554 | 36  | -25 | 52 |
| 6555 | 9   | -25 | 52 |
| 6556 | 0   | -25 | 52 |
| 6557 | -33 | -25 | 52 |
| 6558 | -39 | -25 | 52 |
| 6559 | -48 | -22 | 52 |
| 6560 | 51  | -19 | 52 |
| 6561 | 42  | -19 | 52 |
| 6562 | 3   | -19 | 52 |
| 6563 | -3  | -19 | 52 |
| 6564 | -9  | -19 | 52 |
| 6565 | -36 | -16 | 52 |
| 6566 | -42 | -16 | 52 |
| 6567 | -48 | -16 | 52 |
| 6568 | 39  | -13 | 52 |
| 6569 | 6   | -13 | 52 |
| 6570 | -3  | -13 | 52 |
| 6571 | -9  | -13 | 52 |
| 6572 | -30 | -13 | 52 |
| 6573 | 48  | -10 | 52 |
| 6574 | 27  | -10 | 52 |
| 6575 | -36 | -10 | 52 |
| 6576 | -42 | -10 | 52 |
| 6577 | 39  | -7  | 52 |
| 6578 | 6   | -7  | 52 |
| 6579 | 0   | -7  | 52 |
| 6580 | -9  | -7  | 52 |

|      |     |    |    |
|------|-----|----|----|
| 6581 | -30 | -7 | 52 |
| 6582 | 33  | -4 | 52 |
| 6583 | -36 | -4 | 52 |
| 6584 | -42 | -4 | 52 |
| 6585 | 27  | -1 | 52 |
| 6586 | 12  | -1 | 52 |
| 6587 | 6   | -1 | 52 |
| 6588 | 0   | -1 | 52 |
| 6589 | -9  | -1 | 52 |
| 6590 | -21 | -1 | 52 |
| 6591 | -27 | -1 | 52 |
| 6592 | 42  | 2  | 52 |
| 6593 | 36  | 2  | 52 |
| 6594 | 30  | 5  | 52 |
| 6595 | 21  | 5  | 52 |
| 6596 | 12  | 5  | 52 |
| 6597 | 6   | 5  | 52 |
| 6598 | 0   | 5  | 52 |
| 6599 | -9  | 5  | 52 |
| 6600 | -27 | 5  | 52 |
| 6601 | -33 | 5  | 52 |
| 6602 | -39 | 5  | 52 |
| 6603 | 42  | 8  | 52 |
| 6604 | 36  | 11 | 52 |
| 6605 | 30  | 11 | 52 |
| 6606 | 24  | 11 | 52 |
| 6607 | 12  | 11 | 52 |
| 6608 | 6   | 11 | 52 |
| 6609 | 0   | 11 | 52 |
| 6610 | -9  | 11 | 52 |
| 6611 | -27 | 11 | 52 |
| 6612 | -33 | 11 | 52 |
| 6613 | -39 | 11 | 52 |
| 6614 | 36  | 17 | 52 |
| 6615 | 30  | 17 | 52 |
| 6616 | 24  | 17 | 52 |
| 6617 | 18  | 17 | 52 |
| 6618 | 6   | 17 | 52 |
| 6619 | 0   | 17 | 52 |
| 6620 | -9  | 17 | 52 |
| 6621 | -21 | 17 | 52 |
| 6622 | -27 | 17 | 52 |
| 6623 | -36 | 17 | 52 |
| 6624 | 24  | 23 | 52 |
| 6625 | 15  | 23 | 52 |
| 6626 | 6   | 23 | 52 |
| 6627 | 0   | 23 | 52 |



|      |     |     |    |
|------|-----|-----|----|
| 6628 | -15 | 23  | 52 |
| 6629 | -21 | 23  | 52 |
| 6630 | -27 | 23  | 52 |
| 6631 | 21  | 29  | 52 |
| 6632 | 15  | 29  | 52 |
| 6633 | 6   | 29  | 52 |
| 6634 | 0   | 29  | 52 |
| 6635 | -6  | 29  | 52 |
| 6636 | -12 | 29  | 52 |
| 6637 | -18 | 32  | 52 |
| 6638 | 21  | 35  | 52 |
| 6639 | 15  | 35  | 52 |
| 6640 | 9   | 35  | 52 |
| 6641 | 0   | 35  | 52 |
| 6642 | -6  | 35  | 52 |
| 6643 | -12 | 35  | 52 |
| 6644 | -6  | 41  | 52 |
| 6645 | 21  | -70 | 55 |
| 6646 | 15  | -70 | 55 |
| 6647 | 9   | -70 | 55 |
| 6648 | -12 | -70 | 55 |
| 6649 | -18 | -70 | 55 |
| 6650 | 30  | -64 | 55 |
| 6651 | 21  | -64 | 55 |
| 6652 | 15  | -64 | 55 |
| 6653 | 9   | -64 | 55 |
| 6654 | 3   | -64 | 55 |
| 6655 | -3  | -64 | 55 |
| 6656 | -9  | -64 | 55 |
| 6657 | -18 | -64 | 55 |
| 6658 | -24 | -64 | 55 |
| 6659 | -30 | -64 | 55 |
| 6660 | 36  | -58 | 55 |
| 6661 | 30  | -58 | 55 |
| 6662 | 24  | -58 | 55 |
| 6663 | 15  | -58 | 55 |
| 6664 | 9   | -58 | 55 |
| 6665 | 3   | -58 | 55 |
| 6666 | -3  | -58 | 55 |
| 6667 | -9  | -58 | 55 |
| 6668 | -15 | -58 | 55 |
| 6669 | -24 | -58 | 55 |
| 6670 | 42  | -52 | 55 |
| 6671 | 36  | -52 | 55 |
| 6672 | 30  | -52 | 55 |
| 6673 | 24  | -52 | 55 |
| 6674 | 9   | -52 | 55 |

|      |     |     |    |
|------|-----|-----|----|
| 6675 | 3   | -52 | 55 |
| 6676 | -3  | -52 | 55 |
| 6677 | -9  | -52 | 55 |
| 6678 | -24 | -52 | 55 |
| 6679 | -33 | -52 | 55 |
| 6680 | -39 | -52 | 55 |
| 6681 | 42  | -46 | 55 |
| 6682 | 36  | -46 | 55 |
| 6683 | 30  | -46 | 55 |
| 6684 | 9   | -46 | 55 |
| 6685 | 3   | -46 | 55 |
| 6686 | -3  | -46 | 55 |
| 6687 | -9  | -46 | 55 |
| 6688 | -27 | -46 | 55 |
| 6689 | -33 | -46 | 55 |
| 6690 | -39 | -46 | 55 |
| 6691 | 30  | -40 | 55 |
| 6692 | 15  | -40 | 55 |
| 6693 | 9   | -40 | 55 |
| 6694 | 3   | -40 | 55 |
| 6695 | -3  | -40 | 55 |
| 6696 | -9  | -40 | 55 |
| 6697 | -33 | -40 | 55 |
| 6698 | -45 | -40 | 55 |
| 6699 | 45  | -34 | 55 |
| 6700 | 39  | -34 | 55 |
| 6701 | 33  | -34 | 55 |
| 6702 | 9   | -34 | 55 |
| 6703 | 3   | -34 | 55 |
| 6704 | -3  | -34 | 55 |
| 6705 | -9  | -34 | 55 |
| 6706 | -36 | -34 | 55 |
| 6707 | -42 | -34 | 55 |
| 6708 | 45  | -28 | 55 |
| 6709 | 39  | -28 | 55 |
| 6710 | 33  | -28 | 55 |
| 6711 | 27  | -28 | 55 |
| 6712 | 3   | -28 | 55 |
| 6713 | -3  | -28 | 55 |
| 6714 | -9  | -28 | 55 |
| 6715 | -30 | -28 | 55 |
| 6716 | -36 | -28 | 55 |
| 6717 | -42 | -28 | 55 |
| 6718 | -48 | -28 | 55 |
| 6719 | 45  | -22 | 55 |
| 6720 | 39  | -22 | 55 |
| 6721 | 33  | -22 | 55 |

|      |     |     |    |
|------|-----|-----|----|
| 6722 | 6   | -22 | 55 |
| 6723 | -6  | -22 | 55 |
| 6724 | -36 | -22 | 55 |
| 6725 | -42 | -22 | 55 |
| 6726 | 48  | -16 | 55 |
| 6727 | 36  | -16 | 55 |
| 6728 | 9   | -16 | 55 |
| 6729 | 0   | -16 | 55 |
| 6730 | -6  | -16 | 55 |
| 6731 | -24 | -13 | 55 |
| 6732 | -39 | -13 | 55 |
| 6733 | -45 | -13 | 55 |
| 6734 | 42  | -10 | 55 |
| 6735 | 36  | -10 | 55 |
| 6736 | 9   | -10 | 55 |
| 6737 | 3   | -10 | 55 |
| 6738 | -6  | -10 | 55 |
| 6739 | 30  | -7  | 55 |
| 6740 | 24  | -7  | 55 |
| 6741 | -21 | -7  | 55 |
| 6742 | -39 | -7  | 55 |
| 6743 | 42  | -4  | 55 |
| 6744 | 9   | -4  | 55 |
| 6745 | 3   | -4  | 55 |
| 6746 | -3  | -4  | 55 |
| 6747 | 21  | -1  | 55 |
| 6748 | -33 | -1  | 55 |
| 6749 | -39 | -1  | 55 |
| 6750 | 9   | 2   | 55 |
| 6751 | 3   | 2   | 55 |
| 6752 | -3  | 2   | 55 |
| 6753 | -24 | 2   | 55 |
| 6754 | 39  | 5   | 55 |
| 6755 | 33  | 8   | 55 |
| 6756 | 27  | 8   | 55 |
| 6757 | 9   | 8   | 55 |
| 6758 | 3   | 8   | 55 |
| 6759 | -3  | 8   | 55 |
| 6760 | -18 | 8   | 55 |
| 6761 | -24 | 8   | 55 |
| 6762 | -30 | 8   | 55 |
| 6763 | -36 | 8   | 55 |
| 6764 | 18  | 11  | 55 |
| 6765 | 33  | 14  | 55 |
| 6766 | 27  | 14  | 55 |
| 6767 | 9   | 14  | 55 |
| 6768 | 3   | 14  | 55 |

|      |     |     |    |
|------|-----|-----|----|
| 6769 | -3  | 14  | 55 |
| 6770 | -12 | 14  | 55 |
| 6771 | -18 | 14  | 55 |
| 6772 | -24 | 14  | 55 |
| 6773 | -30 | 14  | 55 |
| 6774 | 33  | 20  | 55 |
| 6775 | 27  | 20  | 55 |
| 6776 | 21  | 20  | 55 |
| 6777 | 12  | 20  | 55 |
| 6778 | 3   | 20  | 55 |
| 6779 | -3  | 20  | 55 |
| 6780 | -12 | 20  | 55 |
| 6781 | -18 | 20  | 55 |
| 6782 | -24 | 20  | 55 |
| 6783 | -30 | 20  | 55 |
| 6784 | 18  | 26  | 55 |
| 6785 | 12  | 26  | 55 |
| 6786 | 3   | 26  | 55 |
| 6787 | -3  | 26  | 55 |
| 6788 | -9  | 26  | 55 |
| 6789 | -18 | 26  | 55 |
| 6790 | -24 | 26  | 55 |
| 6791 | 18  | 32  | 55 |
| 6792 | 12  | 32  | 55 |
| 6793 | 3   | 32  | 55 |
| 6794 | -3  | 32  | 55 |
| 6795 | -9  | 32  | 55 |
| 6796 | 6   | 38  | 55 |
| 6797 | -3  | 38  | 55 |
| 6798 | 24  | -67 | 58 |
| 6799 | 18  | -67 | 58 |
| 6800 | 12  | -67 | 58 |
| 6801 | 6   | -67 | 58 |
| 6802 | -6  | -67 | 58 |
| 6803 | -15 | -67 | 58 |
| 6804 | -21 | -67 | 58 |
| 6805 | 33  | -61 | 58 |
| 6806 | 27  | -61 | 58 |
| 6807 | 18  | -61 | 58 |
| 6808 | 12  | -61 | 58 |
| 6809 | 6   | -61 | 58 |
| 6810 | 0   | -61 | 58 |
| 6811 | -6  | -61 | 58 |
| 6812 | -12 | -61 | 58 |
| 6813 | -21 | -61 | 58 |
| 6814 | -27 | -61 | 58 |
| 6815 | -33 | -58 | 58 |

|      |     |     |    |
|------|-----|-----|----|
| 6816 | 33  | -55 | 58 |
| 6817 | 27  | -55 | 58 |
| 6818 | 21  | -55 | 58 |
| 6819 | 12  | -55 | 58 |
| 6820 | 6   | -55 | 58 |
| 6821 | 0   | -55 | 58 |
| 6822 | -6  | -55 | 58 |
| 6823 | -12 | -55 | 58 |
| 6824 | -18 | -55 | 58 |
| 6825 | -27 | -55 | 58 |
| 6826 | 39  | -49 | 58 |
| 6827 | 33  | -49 | 58 |
| 6828 | 27  | -49 | 58 |
| 6829 | 15  | -49 | 58 |
| 6830 | 6   | -49 | 58 |
| 6831 | 0   | -49 | 58 |
| 6832 | -6  | -49 | 58 |
| 6833 | -12 | -49 | 58 |
| 6834 | -30 | -49 | 58 |
| 6835 | -36 | -49 | 58 |
| 6836 | 39  | -43 | 58 |
| 6837 | 33  | -43 | 58 |
| 6838 | 27  | -43 | 58 |
| 6839 | 12  | -43 | 58 |
| 6840 | 6   | -43 | 58 |
| 6841 | 0   | -43 | 58 |
| 6842 | -6  | -43 | 58 |
| 6843 | -12 | -43 | 58 |
| 6844 | -30 | -43 | 58 |
| 6845 | -36 | -43 | 58 |
| 6846 | -42 | -43 | 58 |
| 6847 | 42  | -37 | 58 |
| 6848 | 36  | -37 | 58 |
| 6849 | 27  | -37 | 58 |
| 6850 | 12  | -37 | 58 |
| 6851 | 6   | -37 | 58 |
| 6852 | 0   | -37 | 58 |
| 6853 | -6  | -37 | 58 |
| 6854 | -12 | -37 | 58 |
| 6855 | -27 | -37 | 58 |
| 6856 | -39 | -37 | 58 |
| 6857 | 42  | -31 | 58 |
| 6858 | 36  | -31 | 58 |
| 6859 | 30  | -31 | 58 |
| 6860 | 6   | -31 | 58 |
| 6861 | 0   | -31 | 58 |
| 6862 | -6  | -31 | 58 |

|      |     |     |    |
|------|-----|-----|----|
| 6863 | -24 | -31 | 58 |
| 6864 | -33 | -31 | 58 |
| 6865 | -39 | -31 | 58 |
| 6866 | -45 | -31 | 58 |
| 6867 | 42  | -25 | 58 |
| 6868 | 36  | -25 | 58 |
| 6869 | 30  | -25 | 58 |
| 6870 | 9   | -25 | 58 |
| 6871 | 0   | -25 | 58 |
| 6872 | -27 | -25 | 58 |
| 6873 | -33 | -25 | 58 |
| 6874 | -39 | -25 | 58 |
| 6875 | -45 | -25 | 58 |
| 6876 | 42  | -19 | 58 |
| 6877 | 3   | -19 | 58 |
| 6878 | -3  | -19 | 58 |
| 6879 | -39 | -19 | 58 |
| 6880 | -45 | -19 | 58 |
| 6881 | -27 | -16 | 58 |
| 6882 | 39  | -13 | 58 |
| 6883 | 33  | -13 | 58 |
| 6884 | 27  | -13 | 58 |
| 6885 | 6   | -13 | 58 |
| 6886 | -3  | -13 | 58 |
| 6887 | -9  | -13 | 58 |
| 6888 | -33 | -13 | 58 |
| 6889 | -27 | -10 | 58 |
| 6890 | -42 | -10 | 58 |
| 6891 | 39  | -7  | 58 |
| 6892 | 6   | -7  | 58 |
| 6893 | 0   | -7  | 58 |
| 6894 | -9  | -7  | 58 |
| 6895 | -33 | -7  | 58 |
| 6896 | 33  | -4  | 58 |
| 6897 | 27  | -4  | 58 |
| 6898 | -24 | -4  | 58 |
| 6899 | 39  | -1  | 58 |
| 6900 | 6   | -1  | 58 |
| 6901 | 0   | -1  | 58 |
| 6902 | -6  | -1  | 58 |
| 6903 | -18 | -1  | 58 |
| 6904 | 33  | 2   | 58 |
| 6905 | 27  | 2   | 58 |
| 6906 | -30 | 2   | 58 |
| 6907 | -36 | 2   | 58 |
| 6908 | 21  | 5   | 58 |
| 6909 | 12  | 5   | 58 |

|      |     |     |    |
|------|-----|-----|----|
| 6910 | 6   | 5   | 58 |
| 6911 | 0   | 5   | 58 |
| 6912 | -6  | 5   | 58 |
| 6913 | -21 | 5   | 58 |
| 6914 | -12 | 8   | 58 |
| 6915 | 36  | 11  | 58 |
| 6916 | 30  | 11  | 58 |
| 6917 | 24  | 11  | 58 |
| 6918 | 12  | 11  | 58 |
| 6919 | 6   | 11  | 58 |
| 6920 | 0   | 11  | 58 |
| 6921 | -6  | 11  | 58 |
| 6922 | -21 | 11  | 58 |
| 6923 | -27 | 11  | 58 |
| 6924 | -33 | 11  | 58 |
| 6925 | 30  | 17  | 58 |
| 6926 | 24  | 17  | 58 |
| 6927 | 18  | 17  | 58 |
| 6928 | 6   | 17  | 58 |
| 6929 | 0   | 17  | 58 |
| 6930 | -6  | 17  | 58 |
| 6931 | -15 | 17  | 58 |
| 6932 | -21 | 17  | 58 |
| 6933 | -27 | 17  | 58 |
| 6934 | 24  | 23  | 58 |
| 6935 | 15  | 23  | 58 |
| 6936 | 9   | 23  | 58 |
| 6937 | 0   | 23  | 58 |
| 6938 | -6  | 23  | 58 |
| 6939 | -15 | 23  | 58 |
| 6940 | -21 | 23  | 58 |
| 6941 | 15  | 29  | 58 |
| 6942 | 9   | 29  | 58 |
| 6943 | 0   | 29  | 58 |
| 6944 | -6  | 29  | 58 |
| 6945 | -12 | 29  | 58 |
| 6946 | 21  | -64 | 61 |
| 6947 | 15  | -64 | 61 |
| 6948 | 9   | -64 | 61 |
| 6949 | -9  | -64 | 61 |
| 6950 | -18 | -64 | 61 |
| 6951 | 30  | -58 | 61 |
| 6952 | 24  | -58 | 61 |
| 6953 | 15  | -58 | 61 |
| 6954 | 9   | -58 | 61 |
| 6955 | 3   | -58 | 61 |
| 6956 | -3  | -58 | 61 |

|      |     |     |    |
|------|-----|-----|----|
| 6957 | -9  | -58 | 61 |
| 6958 | -15 | -58 | 61 |
| 6959 | -24 | -58 | 61 |
| 6960 | 36  | -52 | 61 |
| 6961 | 30  | -52 | 61 |
| 6962 | 24  | -52 | 61 |
| 6963 | 18  | -52 | 61 |
| 6964 | 9   | -52 | 61 |
| 6965 | 3   | -52 | 61 |
| 6966 | -3  | -52 | 61 |
| 6967 | -9  | -52 | 61 |
| 6968 | -15 | -52 | 61 |
| 6969 | -21 | -52 | 61 |
| 6970 | -33 | -52 | 61 |
| 6971 | 36  | -46 | 61 |
| 6972 | 30  | -46 | 61 |
| 6973 | 24  | -46 | 61 |
| 6974 | 18  | -46 | 61 |
| 6975 | 9   | -46 | 61 |
| 6976 | 3   | -46 | 61 |
| 6977 | -3  | -46 | 61 |
| 6978 | -9  | -46 | 61 |
| 6979 | -15 | -46 | 61 |
| 6980 | -21 | -46 | 61 |
| 6981 | -27 | -46 | 61 |
| 6982 | -33 | -46 | 61 |
| 6983 | 30  | -40 | 61 |
| 6984 | 24  | -40 | 61 |
| 6985 | 15  | -40 | 61 |
| 6986 | 9   | -40 | 61 |
| 6987 | 3   | -40 | 61 |
| 6988 | -3  | -40 | 61 |
| 6989 | -9  | -40 | 61 |
| 6990 | -15 | -40 | 61 |
| 6991 | -21 | -40 | 61 |
| 6992 | -33 | -40 | 61 |
| 6993 | 39  | -34 | 61 |
| 6994 | 33  | -34 | 61 |
| 6995 | 24  | -34 | 61 |
| 6996 | 9   | -34 | 61 |
| 6997 | 3   | -34 | 61 |
| 6998 | -3  | -34 | 61 |
| 6999 | -9  | -34 | 61 |
| 7000 | -21 | -34 | 61 |
